# Supplementary material
Source: PubMed Central journal article supplement (PMC9585461)
Supplement: jamaoncol-e225049-s001.pdf [file jamaoncol-e225049-s001.pdf]

1 **N107C Title Page**

2  
3 Alliance for Clinical Trials in Oncology

4  
5 **N107C: Phase III Trial of Post-Surgical Stereotactic Radiosurgery (SRS) Compared with Whole**  
6 **Brain Radiotherapy (WBRT) for Resected Metastatic Brain Disease**

7  
8 *For any communications regarding this protocol,*  
9 *please call the protocol resource person on the following page.*

10  
11 **Study Chairs:** Paul D. Brown, M.D (NCCTG)\*  
12 M.D. Anderson Cancer Center  
13 1515 Holcombe Boulevard. Unit 97  
14 Houston, Texas 77030  
15 Telephone (713) 563-2415  
16 Telefax (713) 563-2302  
17 Email: [pdbrown@mdanderson.org](mailto:pdbrown@mdanderson.org)

18  
19 David Roberge, M.D. (NCIC)  
20 CHUM – Notre Dame  
21 Lachapelle, TS-3366  
22 1560, rue Sherbrooke Est.  
23 Montreal, Quebec H2L 4M1  
24 Telephone (514) 890-8254  
25 Telefax (514) 412-7537  
26 Email: [david.roberge.chum@sss.gouv.qc.ca](mailto:david.roberge.chum@sss.gouv.qc.ca)

27  
28 **\*Investigator having NCI responsibility for this protocol**

29

| <b>Document History</b> | <b>(Effective Date)</b> |
|-------------------------|-------------------------|
| Activation              | July 8, 2011            |
| Addendum 1              | August 5, 2011          |
| Addendum 2              | March 22, 2012          |
| Addendum 3              | December 21, 2012       |
| Update 4                | June 7, 2013            |
| Update 5                | June 7, 2013            |
| Update 6                | August 15, 2013         |
| Update 7                | October 30, 2013        |
| Update 8                | December 1, 2014        |

30  
31

| <b>Participating Organizations</b>                                                                                                                                                                                   | <b>Date Activated</b> |
|----------------------------------------------------------------------------------------------------------------------------------------------------------------------------------------------------------------------|-----------------------|
| <b>ALLIANCE/Alliance for Clinical Trials in Oncology (Lead), ECOG-ACRIN</b><br>Medical Research Foundation, Inc., <b>NRG/NRG</b> Oncology Foundation Inc.,<br><b>SWOG/SWOG, NCIC-CTG/ NCIC</b> Clinical Trials Group | July 8, 2011          |

39 **Study Staff**

40

41 **Statistician**

42 Karla Ballman, Ph.D. √  
 43 Mayo Clinic  
 44 200 First Street Southwest  
 45 Rochester, Minnesota 55905  
 46 Telephone (507) 284-8803  
 47 Email: ballman.karla@mayo.edu

48

49

50 **Study Co-Chairs**

51

52 **Radiation Oncology**

53 Nadia Laack, M.D. (NCCTG)  
 54 Mayo Clinic  
 55 200 First Street Southwest  
 56 Rochester, Minnesota 55905  
 57 Telephone (507) 284-4561  
 58 Telefax (507) 284-0079  
 59 Email: laack.nadia@mayo.edu

60

61

62 **Pathology**

63 Caterina Giannini, M.D. (NCCTG)  
 64 Mayo Clinic  
 65 200 First Street Southwest  
 66 Rochester, Minnesota 55905  
 67 Telephone (507) 284-1473  
 68 Email: giannini.caterina@mayo.edu

69

70

71 **Neuropsychology**

72 Elena Farace, Ph.D. √  
 73 Penn State Hershey Medical Center  
 74 500 University Drive, CH 69  
 75 Hershey, Pennsylvania 17033  
 76 Telephone: (717) 531-7390  
 77 Email: efarace@hmc.psu.edu

78

79

80

81

82

83

84

85

86

87

√Study contributor(s) not responsible for patient care

**Radiation Oncology**

Jonathan Ashman, M.D. (NCCTG)  
 Mayo Clinic  
 13400 East Shea Boulevard  
 Scottsdale, Arizona 85259  
 Telephone (480) 301-8000  
 Telefax (480) 301-7687  
 Email: ashman.jonathan@mayo.edu

**Correlative Research**

Deepak Khuntia, M.D. √  
 Western Radiation Oncology  
 125 South Drive  
 Mountain View, California 94040  
 Telephone: (650) 940-7280  
 Email: khuntia@humonc.wisc.edu

**Neuropsychology**

Jane Cerhan, Ph.D. (NCCTG) √  
 Mayo Clinic  
 200 First Street Southwest  
 Rochester, Minnesota 55905  
 Telephone (507) 284-2933  
 Email: cerhan.jane@mayo.edu

88 **Cooperative Groups Study Co-Chairs**

89  
90 **NCCTG** **ACOSOG**  
91 Ian Parney, MD Fred Barker, MD  
92 Mayo Clinic Massachusetts General Hospital  
93 200 First Street Southwest 55 Fruit Street Mail Stop Yawkey 9E  
94 Rochester, Minnesota 55905 Boston, Massachusetts 02114  
95 Telephone: (507) 284-8167 Telephone: (617) 724-8772  
96 Email: parney.ian@mayo.edu Email: barker@helix.mgh.harvard.edu  
97  
98

99 **CALGB** **RTOG**  
100 James Urbanic, MD Costas G. Hadjipanayis, M.D., Ph.D.  
101 Wake Forest University School of Medicine Emory University School of Medicine  
102 Medical Center Boulevard 1365B Clifton Road, Suite 6200  
103 Winston-Salem, North Carolina 27157 Atlanta, Georgia 30322  
104 Telephone: (336) 713-5642 Telephone: (404) 778-4472  
105 Telefax: (336) 713-6565 Telefax: (404) 778-4472  
106 Email: jurbanic@wakehealth.edu Email: chadjip@emory.edu  
107  
108

109 **SWOG**  
110 Laurie E. Gaspar, M.D.  
111 University of Colorado HSC  
112 Anschutz Cancer Pavilion  
113 Post Office Box 6510, MS F706  
114 Aurora, Colorado 80045  
115 Telephone: (720) 848-0154  
116 Telefax: (720) 848-0222  
117 Email: laurie.gaspar@ucdenver.edu

118  
119

**Cancer Trials Support Unit (CTSU) Address and Contact Information**

| <b>To submit site registration documents:</b>                                                                                                                                                                                                                                                                                                                                                                                                                                                                                                                                                                                                      | <b>For patient enrollments:</b>                                                                                                                                                                                                                                                                                                                                                                                                                                     | <b>Submit study data</b>                                                                                                                                                                                                                                                                                                                                                             |
|----------------------------------------------------------------------------------------------------------------------------------------------------------------------------------------------------------------------------------------------------------------------------------------------------------------------------------------------------------------------------------------------------------------------------------------------------------------------------------------------------------------------------------------------------------------------------------------------------------------------------------------------------|---------------------------------------------------------------------------------------------------------------------------------------------------------------------------------------------------------------------------------------------------------------------------------------------------------------------------------------------------------------------------------------------------------------------------------------------------------------------|--------------------------------------------------------------------------------------------------------------------------------------------------------------------------------------------------------------------------------------------------------------------------------------------------------------------------------------------------------------------------------------|
| <p>CTSU Regulatory Office<br/>1818 Market Street, Suite 1100<br/>Philadelphia, PA 19103<br/>Phone – 1-866-651-CTSU<br/>Fax – 215-569-0206<br/>Email:<br/>CTSURegulatory@ctsu.coccg.org (for submitting regulatory documents only)</p>                                                                                                                                                                                                                                                                                                                                                                                                              | <p>Please refer to the patient enrollment section of the protocol for instructions on using the Oncology Patient Enrollment Network (OPEN) which can be accessed at<br/><a href="https://www.ctsu.org/OPEN_SYS">https://www.ctsu.org/OPEN_SYS</a> TEM/ or <a href="https://OPEN.ctsu.org">https://OPEN.ctsu.org</a>.<br/><br/>Contact the CTSU Help Desk with any OPEN-related questions at <a href="mailto:ctsucontact@westat.com">ctsucontact@westat.com</a>.</p> | <p>NCCTG Operations Office<br/>Attn: QAS for Study N107C<br/>NW Clinic, 3-24 CC<br/>200 First Street Southwest<br/>Rochester Minnesota 55905<br/><br/>Tel: (507) 284-1370<br/>Telefax: (507) 266-7240<br/>Sites should submit forms via Fax or Mail.<br/><br/>Do <u>not</u> submit study data or forms to CTSU Data Operations. Do <u>not</u> copy the CTSU on data submissions.</p> |
| <p>The most current version of the <b>study protocol and all supporting documents</b> must be downloaded from the protocol-specific Web page of the CTSU Member Web site located at <a href="https://www.ctsu.org">https://www.ctsu.org</a>. Access to the CTSU members’ website is managed through the Cancer Therapy and Evaluation Program - Identity and Access Management (CTEP-IAM) registration system and requires user log on with CTEP-IAM username and password. Permission to view and download this protocol and its supporting documents is restricted and is based on person and site roster assignment housed in the CTSU RSS.</p> |                                                                                                                                                                                                                                                                                                                                                                                                                                                                     |                                                                                                                                                                                                                                                                                                                                                                                      |
| <p><b><u>For clinical questions (i.e. patient eligibility or treatment-related)</u></b> Contact the Alliance Research Base Quality Assurance Specialist (listed in Protocol Resources table on next page).</p>                                                                                                                                                                                                                                                                                                                                                                                                                                     |                                                                                                                                                                                                                                                                                                                                                                                                                                                                     |                                                                                                                                                                                                                                                                                                                                                                                      |
| <p><b><u>For non-clinical questions (i.e. unrelated to patient eligibility, treatment, or clinical data submission)</u></b> contact the CTSU Help Desk by phone or e-mail: CTSU General Information Line – 1-888-823-5923, or <a href="mailto:ctsucontact@westat.com">ctsucontact@westat.com</a>. All calls and correspondence will be triaged to the appropriate CTSU representative.</p>                                                                                                                                                                                                                                                         |                                                                                                                                                                                                                                                                                                                                                                                                                                                                     |                                                                                                                                                                                                                                                                                                                                                                                      |
| <p><b><u>For detailed information on the regulatory and monitoring procedures for CTSU sites</u></b> please review the CTSU Regulatory and Monitoring Procedures policy located on the CTSU members’ website <a href="https://www.ctsu.org">https://www.ctsu.org</a> &gt; education and resources tab &gt; CTSU Operations Information &gt; CTSU Regulatory and Monitoring Policy</p>                                                                                                                                                                                                                                                              |                                                                                                                                                                                                                                                                                                                                                                                                                                                                     |                                                                                                                                                                                                                                                                                                                                                                                      |
| <p><b>The CTSU Website is located at <a href="https://www.ctsu.org">https://www.ctsu.org</a>.</b></p>                                                                                                                                                                                                                                                                                                                                                                                                                                                                                                                                              |                                                                                                                                                                                                                                                                                                                                                                                                                                                                     |                                                                                                                                                                                                                                                                                                                                                                                      |

120

**Protocol Resources**

| <b>Questions:</b>                                                                                                                                        | <b>Contact Name:</b>                                                                                                                                                                                                                                                                                                                                  |
|----------------------------------------------------------------------------------------------------------------------------------------------------------|-------------------------------------------------------------------------------------------------------------------------------------------------------------------------------------------------------------------------------------------------------------------------------------------------------------------------------------------------------|
| Patient eligibility*, test schedule, treatment delays, interruptions or adjustments, dose modifications, adverse events, forms completion and submission | Carla Hilton<br>Alliance Research Base Quality Assurance Specialist<br>Telephone: (507) 284-1370<br>Telefax: (507) 266-7240<br>Email: hilton.carla@mayo.edu                                                                                                                                                                                           |
| Protocol document and consent form                                                                                                                       | Tamara Robles, MBA<br>Alliance Protocol Coordinator<br>Telephone: (773) 702-9902<br>Telefax: (312) 345-0117<br>email: roblest@uchicago.edu                                                                                                                                                                                                            |
| Forms completion and submission                                                                                                                          | Carlene Dillavou<br>Alliance Member Clinical Research Associate<br>Telephone: (515) 244-7586<br>Telefax : (515) 244-3037<br>Email: cdillavou@iora.org                                                                                                                                                                                                 |
| Drug administration, infusion pumps, nursing guidelines                                                                                                  | T.J. Scheffler Hanson, R.N.<br>Alliance Research Base Nurse<br>Telephone: (507)284-2459<br>Email: scheffler.tempurance@mayo.edu<br><br>Wanda DeKrey, R.N., OCN<br>Alliance Member Nurse<br>Telephone: (701) 780-6741<br>Email: wdekrey@altru.org                                                                                                      |
| Radiation quality control                                                                                                                                | Kathryn Scherger<br>Alliance Research Base Radiation Quality Control Coordinator<br>Telephone: (507) 266-0006<br>Telefax : (507) 266-7240<br>Email : scherger.kathryn@mayo.edu                                                                                                                                                                        |
| Non-paraffin Biospecimens                                                                                                                                | Roxann M. Neumann, RN, BSN, CCRP<br>Alliance Research Base Biospecimen Resource Manager<br>Telephone: (507) 538-0602<br>Telefax: (507) 266-0824<br>Email: neumann.roxann@mayo.edu<br><br>Ann M. Thorson<br>Alliance Research Base Biospecimen Resource Manager<br>Telephone: (507) 284-0163<br>Telefax: (507) 266-0824<br>Email: thorson.ann@mayo.edu |
| Paraffin-embedded Tissue Pathology                                                                                                                       | Helen Tollefson<br>Alliance Research Base Pathology Coordinator<br>Telephone: (507) 266-0724<br>Telefax: (507) 284-9628<br>Email: tollefson.helen@mayo.edu                                                                                                                                                                                            |
| Adverse Events (CTEP-AERS, MedWatch, Non-AER)                                                                                                            | Patricia G. McNamara<br>Alliance Research Base SAE Coordinator<br>Telephone : (507) 266-3028<br>Telefax : (507) 284-9628<br>Email : mcnamara.patricia@mayo.edu                                                                                                                                                                                        |

121

\*No waivers of eligibility per NCI

122

**Table of Contents**

123 **1.0 Background..... 9**

124 1.1 Treatment ..... 9

125 1.2 Quality of Life (QOL) and Neurocognitive Measures..... 12

126 1.3 Correlative Research ..... 14

127 **2.0 Goals..... 16**

128 2.1 Primary Goals ..... 16

129 2.2 Secondary Goals..... 16

130 2.3 Correlative..... 17

131 **3.0 Patient Eligibility ..... 18**

132 3.1 Pre-registration Inclusion Criteria..... 18

133 3.2 Pre-registration Exclusion Criteria ..... 19

134 3.3 Randomization Inclusion Criteria ..... 20

135 3.4 Randomization Exclusion Criteria ..... 20

136 3.5 Inclusion of Women and Minorities..... 20

137 **4.0 Test Schedule ..... 21**

138 4.1 Patient Quality of Life (QOL) Questionnaire Booklets..... 24

139 4.2 Functional Independence Form..... 24

140 4.3 Neurocognitive Testing ..... 25

141 4.4 SRS Credentialing ..... 28

142 **5.0 Stratification Factors ..... 29**

143 5.1 Age..... 29

144 5.2 Extra-Cranial Disease Controlled..... 29

145 5.3 Number of Pre-operative Brain Metastases..... 29

146 5.4 Histology..... 29

147 5.5 Resection cavity maximal diameter..... 29

148 **6.0 Registration/Randomization Procedures..... 29**

149 6.1 Pre-Registration (Step 1)..... 29

150 6.2 Registration/Randomization (Step 2)..... 32

151 **7.0 Protocol Treatment ..... 33**

152 7.1 Prior to Treatment ..... 33

153 7.2 Whole Brain Radiation Therapy (WBRT) Guidelines (For **ARM A Only**)..... 34

154 7.3 Stereotactic Radiosurgery (SRS) to Surgical Bed Guidelines (For **ARM B Only**) ..... 36

155 7.4 Guideline for *Unresected* Brain Metastases..... 38

156 **8.0 Dosage Modification Based on Adverse Events: None..... 40**

157 **9.0 Ancillary Treatment/Supportive Care..... 40**

158 9.1 Concomitant Medications..... 40

159 **10.0 Adverse Event (AE) Reporting and Monitoring ..... 41**

160 10.1 Adverse Event Characteristics..... 41

161 10.2 Expected vs. Unexpected ..... 41

162 10.3 Assessment of Attribution ..... 41

163 10.4 Expedited Reporting Requirements: Studies using Commercial Agent(s) ONLY ..... 44

164 10.5 Other Required Expedited Reporting ..... 45

165 **11.0 Treatment Evaluation ..... 47**

166 11.1 Response criteria ..... 47

167 11.2 Magnetic Resonance Imaging (MRI) Guidelines ..... 48

168 11.3 Patient Monitoring during Active Treatment ..... 48

169 11.4 Patient Monitoring during Observation ..... 48

170 11.5 Response Rate ..... 48

171 11.6 Time to CNS Failure ..... 49

|     |                                                                                                 |                                                                    |           |
|-----|-------------------------------------------------------------------------------------------------|--------------------------------------------------------------------|-----------|
| 172 | 11.7                                                                                            | Survival .....                                                     | 49        |
| 173 | 11.8                                                                                            | Response Review .....                                              | 49        |
| 174 | <b>12.0</b>                                                                                     | <b>Descriptive Factors .....</b>                                   | <b>49</b> |
| 175 | <b>13.0</b>                                                                                     | <b>Treatment/Follow-up Decision at Evaluation of Patient .....</b> | <b>50</b> |
| 176 | 13.1                                                                                            | Treatment of Recurrence .....                                      | 50        |
| 177 | 13.2                                                                                            | Retreatment Guidelines .....                                       | 50        |
| 178 | 13.3                                                                                            | Treatment / Follow up Decision .....                               | 50        |
| 179 | <b>14.0</b>                                                                                     | <b>Body Fluid Biospecimens .....</b>                               | <b>51</b> |
| 180 | 14.1                                                                                            | Body Fluid Biospecimen Submission .....                            | 51        |
| 181 | 14.2                                                                                            | Blood/Blood Products Handling.....                                 | 51        |
| 182 | 14.3                                                                                            | Urine Handling.....                                                | 54        |
| 183 | 14.4                                                                                            | Correlative Study Methodology and Storage Information.....         | 55        |
| 184 | 14.5                                                                                            | Specimen Registration and Tracking.....                            | 56        |
| 185 | 14.6                                                                                            | Return of Genetic Testing Research Results .....                   | 57        |
| 186 | <b>15.0</b>                                                                                     | <b>Radiation Therapy Risks and Nursing Guidelines .....</b>        | <b>57</b> |
| 187 | 15.1                                                                                            | Whole Brain Radiotherapy (WBRT).....                               | 57        |
| 188 | 15.2                                                                                            | Stereotactic Radiosurgery (SRS).....                               | 58        |
| 189 | <b>16.0</b>                                                                                     | <b>Statistical Considerations and Methodology .....</b>            | <b>59</b> |
| 190 | 16.1                                                                                            | Study Overview .....                                               | 59        |
| 191 | 16.2                                                                                            | Primary Goals .....                                                | 59        |
| 192 | 16.3                                                                                            | Primary Endpoints.....                                             | 59        |
| 193 | 16.4                                                                                            | Accrual Time and Study Duration.....                               | 60        |
| 194 | 16.5                                                                                            | Sample Size Derivation for the Primary Goal .....                  | 60        |
| 195 | 16.6                                                                                            | Analysis Plan for the Primary Goal.....                            | 61        |
| 196 | 16.7                                                                                            | Interim Analysis for the Primary Goal .....                        | 61        |
| 197 | 16.8                                                                                            | Secondary Endpoints and Analysis .....                             | 62        |
| 198 | 16.9 a                                                                                          | Correlative Endpoints and Analysis .....                           | 64        |
| 199 | 16.9b                                                                                           | Monitoring.....                                                    | 64        |
| 200 | 16.9c                                                                                           | Inclusion of Women and Minorities.....                             | 64        |
| 201 | <b>17.0</b>                                                                                     | <b>Pathology Considerations/Tissue Biospecimens .....</b>          | <b>66</b> |
| 202 | 17.1                                                                                            | Tissue Biospecimen Submission .....                                | 66        |
| 203 | 17.2                                                                                            | Paraffin Embedded Tissue Blocks/Slides .....                       | 66        |
| 204 | 17.3                                                                                            | Tissue Banking Procedures .....                                    | 67        |
| 205 | 17.4                                                                                            | Specimen Registration and Tracking.....                            | 68        |
| 206 | <b>18.0</b>                                                                                     | <b>Records and Data Collection Procedures .....</b>                | <b>69</b> |
| 207 | 18.1                                                                                            | Submission Timetable.....                                          | 69        |
| 208 | 18.2                                                                                            | Additional Submission Instructions .....                           | 73        |
| 209 | <b>19.0</b>                                                                                     | <b>Budget .....</b>                                                | <b>74</b> |
| 210 | 19.1                                                                                            | Costs Charged to Patient .....                                     | 74        |
| 211 | 19.2                                                                                            | Tests to be Research Funded.....                                   | 74        |
| 212 | 19.3                                                                                            | Paired Tissue Submission Payment.....                              | 74        |
| 213 | 19.4                                                                                            | Other Budget Concerns .....                                        | 74        |
| 214 | <b>20.0</b>                                                                                     | <b>References .....</b>                                            | <b>75</b> |
| 215 | <b>Appendix I: ECOG Performance Status Criteria .....</b>                                       |                                                                    | <b>79</b> |
| 216 | <b>Appendix II: Administration of Quality of Life (QOL) Patient Questionnaire Booklet .....</b> |                                                                    | <b>80</b> |
| 217 | <b>Appendix III: Patient Quality of Life (QOL) Questionnaire Booklet.....</b>                   |                                                                    | <b>81</b> |
| 218 | <b>Appendix IV: Administration Procedures for the Neurocognitive Tests .....</b>                |                                                                    | <b>82</b> |
| 219 | <b>Appendix V: Patient and Examiner Neurocognitive Testing Questionnaire Booklet.....</b>       |                                                                    | <b>90</b> |
| 220 | <b>Appendix VI: Neurocognitive Testing Submission Fax Form.....</b>                             |                                                                    | <b>91</b> |
| 221 | <b>Appendix VII: Radiation Therapy Quality Control Guidelines for SRS and WBRT .....</b>        |                                                                    | <b>92</b> |

222 **Schema**  
223

224  
225  
226  
227  
228  
229  
230  
231  
232

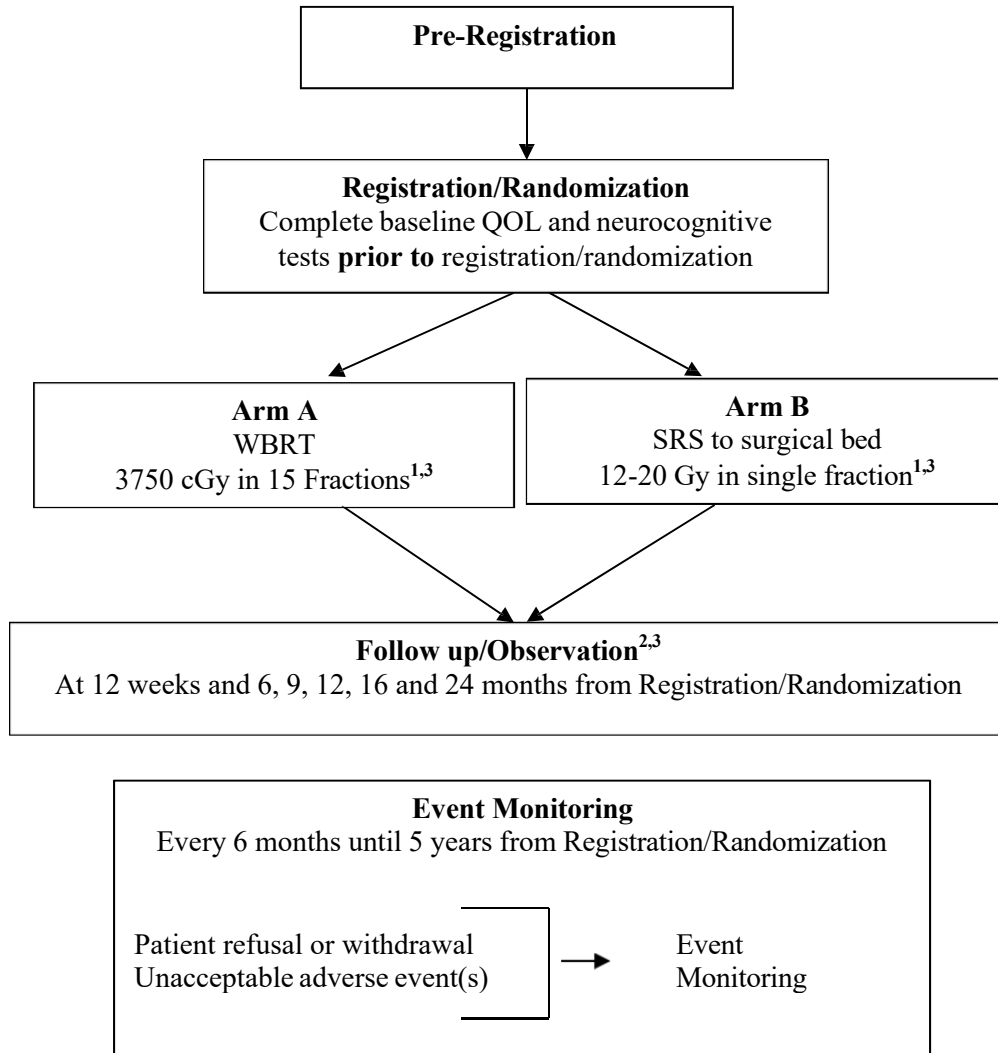

233

234  
235  
236  
237  
238  
239  
240  
241

1. The unresected metastases will be treated with SRS (18-24 Gy depending on treatment arm) as outlined in the treatment section (see [Section 7.0](#)) of the protocol. In addition, sites will make a pre-determined choice of either 3750 cGy in 15 fractions or 3000 cGy in 10 fractions (see [Section 7.0](#)) for **all** patients randomized at that site.
2. In the event of progressive brain metastases or systemic progression, the patient remains in observation for a total of two years and then proceeds to event monitoring for three years (see [Section 13.31](#)).
3. **Treatment:**  
 Cycle 1 = starts day 1 of treatment and ends at week 12 follow up.  
**Follow up/Observation:**  
 Cycle 2 = starts at 12 weeks and ends at 6 month follow up.  
 Cycle 3 = starts at 6 months and ends at 9 month follow up.  
 Cycle 4 = starts at 9 months and ends at 12 month follow up.  
 Cycle 5 = starts at 12 months and ends at 16 month follow up.  
 Cycle 6 = starts at 16 months and ends at 24 month follow up.

242  
243  
244  
245  
246  
247  
248  
249



250 **1.0 Background**

251

252 1.1 Treatment

253 1.11 Study Rationale

254 The development of brain metastases is an unfortunate and common  
 255 complication in oncology patients and can occur in 10 to 30 % of cancer patients  
 256 (Brown *et al.*, 2008). Although the standard treatment for most patients with  
 257 brain metastases remains whole brain radiotherapy (WBRT), surgical resection is  
 258 commonly utilized for select patients with good performance status and limited  
 259 disease, since Phase III randomized trials have shown a survival benefit for  
 260 surgical resection (Patchell *et al.*, 1990; Noordijk *et al.*, 1994). Due to the high  
 261 failure rate in the surgical bed (i.e., local failure), Phase III trials were conducted  
 262 to test the role of adjuvant WBRT after resection of brain metastases (Patchell *et al.*,  
 263 1998; Kocher *et al.*, 2009). Significant improvement in local control was  
 264 seen, but there was no improvement in overall survival. Because of the lack of a  
 265 survival benefit and concerns with neurotoxicity with adjuvant WBRT (Chang *et al.*,  
 266 2009), there have been a number of single institutional studies of stereotactic  
 267 radiosurgery to the surgical bed (SRS). While some studies have achieved local  
 268 control similar to WBRT (Quigley *et al.*, 2008; Hwang *et al.*, 2010; Jensen *et al.*,  
 269 2010), other studies have found significantly worse local control (Kinhult *et al.*,  
 270 2005; Narayana *et al.*, 2006; Soltys *et al.*, 2008). For example local control at  
 271 one year after SRS has ranged from as low as 35 % (Narayana *et al.*, 2006) to as  
 272 high as 100 % (Hwang *et al.*, 2010). In addition due to the lack of rigorous  
 273 scientific study there is uncertainty of the risk or benefits with SRS to surgical  
 274 bed in lieu of WBRT. Regardless of the lack of data, there has been acceptance  
 275 of SRS to the surgical bed as standard practice in many academic and community  
 276 cancer centers (Vogelbaum, 2009). A poll at the 2006 Congress of Neurological  
 277 Surgeons Meeting revealed a third of neurosurgeons resect metastasis and follow  
 278 this with SRS to the surgical bed; it can be safely assumed that this practice has  
 279 grown since 2006. This change in practice is significant from a societal and  
 280 medical resources standpoint since the costs of SRS are considerably higher than  
 281 WBRT (Brown *et al.*, 2009). An analysis of 2008 non-Medicare charges in  
 282 different geographic regions of the United States found WBRT charges ranged  
 283 from \$9,201 to \$17,003 while SRS charges ranged from \$40,715 to \$65,000;  
 284 essentially the charges for SRS were 4 to 6 fold more than WBRT. With  
 285 increased financial costs and the lack of clear risk/benefit data, yet growing  
 286 support in the community for post-operative SRS (instead of WBRT), it is  
 287 imperative SRS to the surgical bed be studied in a prospective multi-institutional  
 288 cooperative group trial.

289

290 We propose a NCCTG-led phase III trial comparing post-operative SRS with  
 291 WBRT in patients with resected brain metastases. Having NCCTG lead a multi-  
 292 institutional trial is a sound decision as NCCTG has shown a strong track record,  
 293 having nearly completed N0574, the largest brain SRS protocol that includes  
 294 extensive neurocognitive testing. NCCTG will plan to build on the same model  
 295 of success as N0574 working in conjunction with other cooperative groups  
 296 through CTSU.



324  
325  
326  
327  
328  
329  
330  
331  
332  
333  
334  
335  
336  
337  
338  
339  
340  
341  
342  
343  
344  
345  
346  
347  
348  
349  
350  
351  
352  
353  
354  
355  
356  
357  
358  
359  
360  
361  
362  
363  
364

1.132 Defining Tumor Bed Control

Tumor bed control is defined as the absence of new nodular contrast enhancement in the surgical bed (Soltys *et al.*, 2008).

1.133 Defining Tumor Bed Radiosurgery Target

Although there is no standardized approach to SRS to the surgical bed, most centers apply a 2 mm margin to the surgical bed (Soltys *et al.*, 2008; Do *et al.*, 2009; Roberge *et al.*, 2009; Ryu *et al.*, 2009). A review of SRS margins utilized in the treatment of 120 surgical bed cavities found significantly improved 6 month tumor bed control when a 2 mm margin was applied compared to no margin (100 % vs. 87 % respectively) with no increase in toxicity (Soltys *et al.*, 2010). Although the largest series in the literature did not define a margin around the tumor bed to which the dose was prescribed (Jensen *et al.*, 2010), the treating physician became more likely to prescribe plans with a higher conformality index as the above data emerged. Therefore the treatment volume will be defined as the surgical bed plus a 2 mm margin.

1.134 Impact of SRS on Neurocognitive Function

A review of the available prospective literature of SRS that includes detailed neuropsychologic testing before and after SRS finds little impact of SRS itself on neurocognitive function. A prospective trial of 95 patients with arteriovenous malformation (AVM) who underwent extensive neuropsychologic testing before and up to 3 years after SRS found no cognitive declines and instead found improvement in intelligence, attention, memory over time (Steinvorth *et al.*, 2002). Of note the treatment volume and dose of the SRS for the AVMs were similar in size and dose for SRS for typical brain metastases (mean volume 4.7 cm<sup>3</sup> and median dose 20 Gy. Another trial of 10 patients with AVMs who underwent neuropsychologic testing before and after SRS found no differences between pre- and post-radiosurgical (average 11 months after SRS) neuropsychological test scores on any measure (Blonder *et al.*, 1999). Although these articles support no negative impact on cognitive function after SRS, they do not address the population of brain metastases treated with SRS. The only prospective trial with detailed neuropsychologic testing before and after SRS for brain metastases was led by Chang *et al* (2009). This trial of patients with 1 to 3 brain metastases found the mean posterior probability of decline for total recall at 6 months to be essentially at baseline function for SRS alone.

365  
366  
367  
368

1.135 Rationale for Overall Survival Endpoint.  
Below is a table that outlines prospective trials of SRS with or without adjuvant WBRT.

| Study                                              | Number of patients | Overall survival (months) |
|----------------------------------------------------|--------------------|---------------------------|
| Kocher SRS                                         | 100                | 10.9                      |
| Kocher SRS + WBRT<br>(Kocher <i>et al.</i> , 2009) | 99                 | 10.9                      |
| Aoyama SRS                                         | 67                 | 8                         |
| Aoyama SRS + WBRT<br>(Aoyama <i>et al.</i> , 2006) | 65                 | 7.5                       |
| Chang SRS                                          | 30                 | 15.2                      |
| Chang SRS + WBRT<br>(Change <i>et al.</i> , 2009)  | 28                 | 5.7                       |

369  
370  
371  
372  
373  
374  
375

Reviewing these data and table in [Section 1.131](#), including the prior outlined study of resected brain metastasis treated with post-operative SRS or WBRT (Hwang *et al.*, 2010) (median overall survival 15 vs. 6.8 months respectively), there appears to be a potential survival advantage with SRS compared to adjuvant WBRT.

376  
377

1.2 Quality of Life (QOL) and Neurocognitive Measures

378  
379  
380  
381  
382  
383  
384

1.21 Quality of Life and Neurocognitive Tests

The current trial will build on the success of N0574 utilizing the same QOL and neurocognitive tests. There are a number of advantages of such an approach including familiarity and acceptance of these tests by clinical research staff, the well-established use of these tests in CNS research, and the possibility of future post-hoc analyses between studies.

385  
386  
387  
388  
389  
390  
391  
392  
393

1.22 Quality of Life Questionnaire

The FACT-BR is a validated QOL instrument, comprising a general component (FACT-G, with five subscales (number of questions in parentheses): physical (7), social (7), emotional (6), functional (7), and a disease-specific subscale (BR) of 23 questions (Weitzner *et al.*, 1995). As with N0574, the FACT-BR QOL instrument will be used at baseline (after pre-registration, but prior to randomization) and at the same time points as the follow-up brain MRI or CT scans.

394  
395  
396  
397  
398  
399  
400

1.23 Functional Independence

The assessment of ‘function’ typically refers to the assessment of disability, as measured by the ability of the patient to perform activities of daily living (ADLs). Given the changes in ADLs that occur in patients with malignant brain tumors (i.e., the inability to work and care for themselves), functional independence will be an important measure of outcome. The Barthel ADL Index is a well-validated, reliable tool measuring patient ability to perform ADLs and is

easily administered by a nurse or physician (Wade, 1992). It also is reliable when administered verbally, as in cases when patients were unable to complete it in writing (Brazil *et al.*, 1997). In addition the Eastern Cooperative Oncology Group (ECOG) performance status scale, as a secondary measure of ADL, will allow for comparison to other cancer trials. As with N0574, functional independence will be evaluated at baseline (after pre-registration, but prior to randomization) and at the same time points as the follow-up brain MRI or CT scans.

#### 1.24 Neurocognitive Testing

The prevention and palliation of neurologic problems due to progression are important goals of treatment. Improvement in survival is not ideal as the sole measure of the benefit of a local therapy for brain metastases, because overall survival is often determined by extra cranial disease (Patchell *et al.*, 1998; Aoyama *et al.*, 2006; Kocher *et al.*, 2009; Mehta *et al.*, 2009). Measurement of neurocognitive function with an established battery by a qualified examiner is an *objective* measure akin to other objective measures such as imaging or laboratory evaluation. The US Food and Drug Administration has indicated that "improvement in neurocognitive function or delay in neurocognitive progression are acceptable end points" (Meyers and Brown, 2006). Neurocognitive function as a primary endpoint has become an accepted practice and has been utilized in a number of on-going (N0577, N0574) and completed phase III trials (Chang *et al.*, 2009; Mehta *et al.*, 2009). Therefore as with N0574, neurocognitive progression will be a co-primary endpoint.

The neurocognitive tests to be used in this study, the same tests as N0574, were chosen on the basis of accepted standardization and psychometric principles, published normative data relative to routine demographics, relevance to general neurocognitive status, and brevity of the overall battery. The tests selected have either low associated practice effect or include multiple equivalent formats. In addition similar variations of this battery have been utilized in multiple multi-institutional trials including ACOSOG Z0300; ECOG E3F05; NCCTG N0574, N0577, N0874; RTOG 0212, 0424, 0525, 0534, 0614, 0825, and 08342 and the two phase III randomized motexafin gadolinium studies (Mehta *et al.*, 2009; Meyers *et al.*, 2004).

The neurocognitive tests include:

- **Memory:** Hopkins Verbal Learning Test (HVLT). (Brandt, 1991)
- **Verbal Fluency:** Controlled Oral Word Association Test from the Multilingual Aphasia Examination (COWAT). (Benton and Hamsher, 1978)
- **Visual Attention:** Trail Making Test A. (Reitan, 1958)
- **Executive Function:** Trail Making Test B. (Reitan, 1958)
- **Delayed Memory:** Recall and Recognition of Word List encoded from the HVLT.

As with N0574, neurocognitive evaluations will be conducted at baseline (after pre-registration, but prior to randomization) and at the same time points as the follow-up brain MRI or CT scans.

#### 1.25 Fatigue/Uniscale and LASA

In addition to the same QOL and neurocognitive measures used in N0574,

451 this current trial will utilize two additional QOL tools: the Fatigue/Uniscale  
 452 Assessment and the Linear Analog Self-Assessment (LASA). These assessments  
 453 will be collected at the same time points as the FACT-BR QOL instrument  
 454 described above (see [Section 1.22](#)).  
 455

456 1.26 Fatigue/Uniscale Assessment:

457 The Fatigue/Uniscale Assessment, a QOL tool routinely used in NCCTG  
 458 treatment studies, will be used to measure QOL. Evidence has arisen indicating  
 459 that baseline single-item assessments of fatigue and overall quality of life are  
 460 strong prognostic indicators for survival in cancer patients, independent of  
 461 performance status. This evidence was derived from two separate meta-analyses  
 462 presented at ASCO, the first involving 23 NCCTG and Mayo Clinic Cancer  
 463 Center oncology clinical trials, the second involving 43 clinical trials. Routine  
 464 inclusion of these measures should be considered similar to that of including  
 465 performance status, either as stratification or prognostic covariates (Tan *et al.*,  
 466 2008; Sloan *et al.*, 2009).  
 467

468 1.27 The Linear Analog Self-Assessment (LASA)

469 The LASA will be used to measure overall health-related QOL by assessing  
 470 overall quality-of-life, mental well-being, physical well-being, and fatigue.  
 471 LASA items have been validated as general measures of global QOL  
 472 dimensional constructs in numerous settings (Grunberg *et al.*, 1996; Gudex *et al.*,  
 473 1996; Hyland and Sodergren, 1996; Bretscher *et al.*, 1999). A series of LASA  
 474 items have been constructed and validated for use in multiple studies with similar  
 475 populations (Bretscher *et al.*, 1999). Dr. Sloan and colleagues have done  
 476 extensive research on the application of single-item LASA measures for  
 477 assessing a wide variety of patient reported outcomes including fatigue,  
 478 peripheral neuropathy, hot flash activity, and anxiety. These single-item  
 479 assessments have become the most-used assessment in all NCI-sponsored cancer  
 480 control studies (Buchanan *et al.*, 2005). Normative data have been obtained from  
 481 various clinical populations enrolled in NCCTG clinical trials and from healthy  
 482 participants attending an NCCTG annual meeting. Normative results indicate  
 483 that, for example, in assessing overall QOL on a 0-100 point scale, healthy  
 484 volunteers will average about 82, hospice patients will average 78, advanced  
 485 cancer patients will average somewhere between 60 and 75, newly diagnosed  
 486 patients will average between 50 and 60, and internal medicine residents will  
 487 average 44. A score below 50 is indicative of a need for immediate exploration  
 488 and intervention for the QOL deficit (Sloan *et al.*, submitted). Due to recent  
 489 research by NCCTG investigators, the NCCTG has decided to include LASA  
 490 measures for overall QOL and fatigue in all future phase II and phase III clinical  
 491 trials as an independent prognostic factor independent of performance status.  
 492

493 1.3 Correlative Research

494  
 495 1.31 Patients Undergoing Brain Irradiation

496 Little data exists on in vivo methods of measuring neurocognitive decline. Most  
 497 of the data on this topic is speculative in nature, and primarily are a result of our  
 498 rapidly growing knowledge of the mechanism of Alzheimer's dementia, which  
 499 largely resemble the mechanism of radiation induced dementia (Raber, 2010). A  
 500 variety of measures will be analyzed in this study to better define the mechanism  
 501 of neurocognitive decline, as well as which patients are most likely to develop

502 neurocognitive decline after brain irradiation. Pre-operative and post-operative  
 503 brain MRI or CT scans, as well as a planning MRI or CT scan (see [Section 4.0](#)  
 504 for timing of this MRI or CT scan) will be submitted. In addition, follow-up brain  
 505 MRI or CT scans after treatment will be performed at 12 weeks and at 6, 9, 12,  
 506 16 and 24 months for imaging studies described below. Serum, buffy coat/DNA,  
 507 and urine will be collected during this trial at baseline (after pre-registration, but  
 508 prior to treatment), at 12 weeks post randomization and at 6 and 12 months after  
 509 randomization. These body fluid biospecimens will be analyzed as described  
 510 below.

### 511 1.32 Imaging

512 It has been documented that after both external beam and stereotactic radiation to  
 513 the brain, radiographic changes are noted on brain MRI (Curnes *et al.*, 1986;  
 514 Tomura *et al.*, 2006) Further, brain MRI may reveal radiation changes in the  
 515 limbic system that may correlate with neurotoxicity (Foster, 2006).  
 516

### 517 1.33 Genetic Markers

518 Apolipoprotein E (ApoE) is an important factor in remodeling and repairing  
 519 neurons in response to injury or stress through its lipid transport function. In fact,  
 520 recent data suggests that patients having the Apo E4 isoform realize Alzheimer's  
 521 dementia far earlier than those without it (Caselli *et al.*, 2009). This allele is  
 522 present in 16% of the general population and 50% of patients with late onset  
 523 Alzheimer's dementia (Teunissen *et al.*, 2002). Given the similar mechanisms of  
 524 dementia between Alzheimer's dementia and radiation induced dementia (e.g.  
 525 vascular or metabolic), Apo E4 genotyping may prove to be a predictor of  
 526 radiation induced neuronal damage. The Apo E4 protein binds rapidly and tightly  
 527 to beta amyloid. Normally beta amyloid exists in a soluble form. However, when  
 528 bound by Apo E4 protein, beta amyloid becomes insoluble and is more likely to  
 529 be deposited in plaques which may lead to changes in microvasculature,  
 530 ultimately leading to neurocognitive decline. Further, patients with just one copy  
 531 of the Apo E4 allele have demonstrated accelerated hippocampal volume loss  
 532 which can also compromise neurocognitive function (Helbecque and Amouyel  
 533 2004). Recent preclinical mouse data from Crawford and Villasana have shown  
 534 neurogenesis in the hippocampus and hippocampal dysfunction depending on  
 535 Apo E status (Crawford *et al.*, 2009; Villasana *et al.*, 2008). Patients with Apo E2  
 536 and Apo E3 alleles, on the contrary, tend to have ¼ the risk of developing  
 537 Alzheimer's disease. It is felt that the E2 and E3 alleles are able to facilitate  
 538 repair and protection from neuronal damage. Apo E genotyping will be  
 539 performed to assess whether a subgroup of patients exists that is genetically  
 540 predisposed to developing neurocognitive decline (or neuroprotection).  
 541

### 542 1.34 Inflammatory Markers

543 Markers of inflammation are elevated with aging and their increase has been  
 544 associated with cognitive decline (Yaffe *et al.*, 2003; Krabbe *et al.*, 2004).  
 545 Epidemiological and retrospective data reveals an improvement in  
 546 neurocognitive function with the use of NSAID's in patients with Alzheimer's  
 547 dementia, hence, supporting an inflammatory process involved in neurocognitive  
 548 decline (Teunissen *et al.*, 2002). Chronic inflammation as a result of mass effect  
 549 from tumor or treatment related inflammation may be associated with  
 550 neurocognitive deficits and can be measured in plasma. Interleukin 1 (IL-1),  
 551 Interleukin 6 (IL-6), and Tumor Necrosis Factor alpha (TNF- $\alpha$ ) are pro-  
 552

553 inflammatory cytokines that are a measure of inflammation and have been shown  
 554 to be elevated in patients with Alzheimer’s dementia (Cacabelos *et al.*, 1994;  
 555 Blum-Degen *et al.*, 1995; Tarkowski *et al.*, 1999; Martinez *et al.*, 2000). In this  
 556 study, inflammatory biomarkers will be measured at baseline (after pre-  
 557 registration, but prior to treatment) and at the various time points indicated above  
 558 to assess whether inflammation changed as a result of type of therapy and what  
 559 impact this has on cognition.

561 1.35 Oxidative Stress

562 Considerable circumstantial evidence suggests surrogates for oxidative damage  
 563 may be ideal biomarkers for radiation-induced neurotoxicity (Beal 1995; Akama  
 564 *et al.*, 1998). Decreased cerebral perfusion results in decreased oxygen and  
 565 glucose delivery that eventually leads to energy deprivation which is the cause of  
 566 oxidative stress in the brain (Teunissen *et al.*, 2002). Oxidative stress from either  
 567 tumor or radiation may be a predictor and excellent measure of neurocognitive  
 568 decline. Isoprostanes are one of the best described indicators of oxidative stress  
 569 and can be measured *in vivo* (Morrow *et al.*, 1992). Our approach to measuring  
 570 oxidative stress will consist of quantifying protein carbonyl content  
 571 spectrophotometrically, measuring lipid hydroperoxides, and finally, quantitating  
 572 isoprostane levels in patient serum.  
 573

574 1.36 Hormone and Growth Factors:

575 Aging and memory decline is associated with the disruption of hormone  
 576 regulation, including glucocorticoids, gonadal steroids, and growth hormone  
 577 (Foster 2006). Cortisol, human chorionic gonadotropin (hCG), insulin-like  
 578 growth factor-1 (IGF-1), and neuronal growth factor (NGF), have all recently  
 579 been associated with cognitive decline in Alzheimer’s disease (Tuszynski *et al.*,  
 580 2005; Ding *et al.*, 2006). ELISA testing of serum specimens for each hormone  
 581 and growth factor will be performed at baseline (after pre-registration, but prior  
 582 to treatment) and at each follow-up visit when neurocognitive testing is  
 583 performed.

584 **2.0 Goals**

595 2.1 Primary Goals

596 2.11 Overall Survival

597 To determine in patients with one to four brain metastases whether there is  
 598 improved overall survival in patients who receive SRS to the surgical bed  
 600 compared to patients who receive WBRT.  
 601

602 2.12 Neurocognitive Progression

603 To determine in patients with one to four brain metastases whether there is less  
 604 neurocognitive progression post-randomization in patients who receive SRS to  
 605 the surgical bed compared to patients who receive WBRT.  
 606

607 2.2 Secondary Goals

608 2.21 Quality of Life (QOL)

609 To determine in patients with resected brain metastases whether there is  
 610 improved QOL in patients who receive SRS to the surgical bed compared to  
 611 patients who receive WBRT.  
 612  
 613



- 614 2.22 Central Nervous System Failure  
 615 To determine in patients with one to four brain metastases whether there is equal  
 616 or longer time to central nervous system (CNS) failure (brain) in patients who  
 617 receive SRS to the surgical bed compared to patients who receive WBRT.  
 618
- 619 2.23 Functional Independence  
 620 To determine in patients with one to four brain metastases whether there is longer  
 621 duration of functional independence in patients who receive SRS to the surgical  
 622 bed compared to patients who receive WBRT.  
 623
- 624 2.24 Long-Term Neurocognitive Status  
 625 To determine in patients with one to four brain metastases whether there is better  
 626 long-term neurocognitive status in patients who receive SRS to the surgical bed  
 627 compared to patients who receive WBRT.  
 628
- 629 2.25 Adverse Events  
 630 To tabulate and descriptively compare the post-treatment adverse events  
 631 associated with the interventions.  
 632
- 633 2.26 Local Tumor Bed Recurrence  
 634 To evaluate local tumor bed recurrence at 6 months with post-surgical SRS to the  
 635 surgical bed in comparison to WBRT.  
 636
- 637 2.27 Local Recurrence  
 638 To evaluate time to local recurrence with post-surgical SRS to the surgical bed in  
 639 comparison to WBRT.  
 640
- 641 2.28 CNS Failure Patterns  
 642 To evaluate if there is any difference in CNS failure patterns (local, distant,  
 643 leptomeningeal) in patients who receive SRS to the surgical bed compared to  
 644 patients who receive WBRT.  
 645
- 646 2.3 Correlative  
 647
- 648 2.31 Changes in the Limbic System  
 649 To evaluate radiation changes in the limbic system that may correlate with  
 650 neurotoxicity using brain MRI or CT scans.  
 651
- 652 2.32 ApoE Subtype  
 653 To determine if Apo E (i.e., Apo E2, Apo E3 and Apo E4) genotyping  
 654 may prove to be a predictor of radiation induced neurocognitive decline (or  
 655 neuroprotection).  
 656
- 657 2.33 Inflammatory Markers  
 658 To determine if inflammatory markers (i.e., IL-1, IL-6 and TNF- $\alpha$ ) may prove to  
 659 be predictors of radiation induced neurocognitive decline.  
 660
- 661 2.34 Oxidative Stress Biomarkers  
 662 To determine if oxidative stress biomarkers (i.e., protein carbonyl content, lipid  
 663 hydroperoxides and isoprostane levels) may prove to be predictors of radiation  
 664 induced neurocognitive decline.

665 2.35 Hormone and Growth Factors  
 666 To determine if hormone and growth factors [i.e., glucocorticoids (i.e. cortisol),  
 667 gonadal steroids (i.e., estradiol, testosterone, progesterone), growth hormone,  
 668 human chorionic gonadotropin (hCG), insulin-like growth factor-1 (IGF-1) and  
 669 neuronal growth factor (NGF)] may prove to be a predictor of radiation induced  
 670 neurocognitive decline.  
 671

### 672 3.0 Patient Eligibility

#### 673 3.1 Pre-registration Inclusion Criteria

##### 674 3.11 Number of Brain Metastases

675 Four or fewer brain metastases (as defined on the pre-operative MRI or CT brain  
 676 scan) and status post resection of one of the lesions.  
 677

##### 678 3.12 Non-CNS Primary Site

679 Pathology from the resected brain metastasis must be consistent with a non-  
 680 central nervous system primary site.  
 681

682 **Note:** Patients with or without active disease outside the nervous system are  
 683 eligible (including patients with unknown primaries), as long as the pathology  
 684 from the brain is consistent with a non-central nervous system primary site.  
 685

##### 686 3.13 Size of Metastases

687 Any unresected lesions must measure < 3.0 cm in maximal extent on the  
 688 contrasted MRI or CT brain scan obtained  $\leq$  35 days prior to pre-registration (see  
 689 Magnetic Resonance Imaging Guidelines, [Section 11.2](#)). The unresected lesions  
 690 will be treated with SRS as outlined in the treatment section ([Section 7.4](#)) of the  
 691 protocol.  
 692

693 **Note:** The metastases size restriction does *not* apply to the *resected* brain  
 694 metastasis; with *resected* brain metastases only surgical cavity size determines  
 695 eligibility.  
 696

##### 697 3.14 Size of Resection Cavity

698 Resection cavity must measure <5.0 cm in maximal extent on the post-operative  
 699 MRI or CT brain scan obtained  $\leq$ 35 days prior to pre-registration.  
 700

701 **Note:** It is permissible for the resection of a dominant brain metastasis to include  
 702 a smaller “satellite” metastasis as long as the single resection cavity is less than  
 703 the maximum size requirements.  
 704

##### 705 3.15 Tumor Staging Procedures

706 All standard tumor-staging procedures necessary to define baseline extra cranial  
 707 disease status completed  $\leq$ 42 days prior to pre-registration.  
 708

##### 709 3.16 Treatment with Gamma Knife or Radiosurgery

710 Able to be treated with either a gamma knife or a linear accelerator-based  
 711 radiosurgery system.  
 712

##### 713 3.17 Age

714 Age  $\geq$  18 years  
 715

- 716 3.18 Neurocognitive Testing  
 717 Willing and able to complete neurocognitive testing **without assistance from**  
 718 **family and companions. Note:** Because neurocognitive testing is one of the  
 719 primary goals of this study, patients must be able to utilize English language  
 720 booklets (and/or French booklets if enrolled in Canada).  
 721
- 722 3.19a Quality of Life (QOL) Questionnaires  
 723 Willing and able to complete QOL by themselves or with assistance (see [Section](#)  
 724 [4.0](#))  
 725
- 726 3.19b ECOG Performance Status  
 727 ECOG Performance Status (PS) 0, 1, or 2. See [Appendix I](#).  
 728
- 729 3.19c SRS Credentialed by IROC Houston Quality Assurance  
 730 The site's SRS facility is IROC Houston Quality Assurance approved.  
 731 See [Section 4.4](#) of the protocol for information on how to obtain this  
 732 credentialing.  
 733
- 734 3.19d Neurocognitive Testing Credentialing  
 735 The site study team member performing neurocognitive testing of patients must  
 736 have credentialing confirming completion of the neurocognitive testing training  
 737 See [Section 4.31](#) of the protocol for information on how to obtain this  
 738 credentialing.  
 739
- 740 3.19e Written Informed Consent  
 741 Provide written informed consent  
 742
- 743 3.19f Mandatory Samples for Correlative Tests  
 744 Willing to provide mandatory blood and urine samples for correlative research  
 745 purposes (see [Sections 6.154](#) and [14.0](#)).  
 746
- 747 3.2 Pre-registration Exclusion Criteria  
 748
- 749 3.21 Pregnancy, Nursing and Contraception  
 750 Any of the following:  
 751
  - Pregnant women
  - Nursing women
  - Men or women of childbearing potential who are unwilling to employ  
 754 adequate contraception throughout the study and for men for up to 3  
 755 months after completing treatment.  
 756
- 757 3.22 Prior Cranial Radiation Therapy  
 758
- 759 3.23 MRI or CT Scans  
 760 Inability to complete a MRI or CT scan with contrast of the head.  
 761
- 762 3.24 Gadolinium Allergy  
 763 Known allergy to gadolinium.  
 764
- 765 3.25 Cytotoxic Chemotherapy  
 766 Planned cytotoxic chemotherapy during the SRS or WBRT.

- 3.26 Other Tumor Types  
Primary germ cell tumor, small cell carcinoma, or lymphoma.
- 3.27 Leptomeningeal Metastasis  
Widespread definitive leptomeningeal metastasis.
- 3.28 Location of Brain Metastasis  
A brain metastasis that is located  $\leq 5$  mm of the optic chiasm or within the brainstem.
- 3.3 Randomization Inclusion Criteria
  - 3.31 Number of Unresected Lesions  
Post-operative MRI or CT scan confirmed zero, one, two or three unresected lesions. Each unresected lesion must measure  $\leq 3.0$  cm in maximal extent on the contrasted post-operative MRI or CT brain scan.  
  
**Note: The pre-registration, post-operative, brain scan may be used for the randomization scan if obtained  $\leq 28$  days prior to randomization.**  
  
**Note: If there are no unresected brain metastases (i.e., all brain metastases have been resected), a post-operative CT brain scan may be used if obtained  $\leq 28$  days prior to randomization.**
  - 3.32 Size of Resection Cavity  
Post-operative MRI or CT scan confirms resection cavity measures  $< 5.0$  cm in maximal extent.  
  
**Note: The pre-registration, post-operative brain scan may be used for the randomization scan if obtained  $\leq 28$  days prior to randomization.**  
  
**Note: If there are no unresected brain metastases (i.e., all brain metastases have been resected), a post-operative CT brain scan may be used if obtained  $\leq 28$  days prior to randomization.**
  - 3.33 Urine or Serum Pregnancy Test  
Negative urine or serum pregnancy test done  $\leq 7$  days prior to randomization, for women of child bearing potential only.
- 3.4 Randomization Exclusion Criteria  
None
- 3.5 Inclusion of Women and Minorities  
Both men and women of all races and ethnic groups are eligible for this study.

4.0 Test Schedule

| Tests and procedures                                                                                            | ≤14 days prior to pre-registration | After pre-registration, but prior to randomization | After randomization | T<br>R<br>E<br>A<br>T<br>M<br>E<br>N<br>T <sup>11</sup> | Follow up/Observation <sup>1, 11</sup> |   |       |    |    |                |
|-----------------------------------------------------------------------------------------------------------------|------------------------------------|----------------------------------------------------|---------------------|---------------------------------------------------------|----------------------------------------|---|-------|----|----|----------------|
|                                                                                                                 |                                    |                                                    |                     |                                                         | Weeks                                  |   | Month |    |    |                |
|                                                                                                                 |                                    |                                                    |                     |                                                         | 12                                     | 6 | 9     | 12 | 16 | 24             |
| History and Physical Exam, including Weight, Recording of Medications and ECOG Performance Status               | X <sup>2</sup>                     |                                                    |                     |                                                         | X                                      | X | X     | X  | X  | X              |
| Height                                                                                                          | X                                  |                                                    |                     |                                                         |                                        |   |       |    |    |                |
| Radiation Oncology Consultation (See <a href="#">Section 6.158</a> )                                            | X                                  |                                                    |                     |                                                         |                                        |   |       |    |    |                |
| Neuro History and Exam                                                                                          | X                                  |                                                    |                     |                                                         | X                                      | X | X     | X  | X  | X              |
| MRI or CT Scan                                                                                                  | X <sup>3</sup>                     | X <sup>4</sup>                                     |                     |                                                         | X                                      | X | X     | X  | X  | X              |
| Adverse Event Assessment <sup>5</sup>                                                                           | X                                  |                                                    |                     |                                                         | X                                      | X | X     | X  | X  | X              |
| Urine or Serum Pregnancy Test <sup>6</sup>                                                                      |                                    | X                                                  |                     |                                                         |                                        |   |       |    |    |                |
| Mandatory blood samples <sup>7, R</sup> (see <a href="#">Section 14.0</a> )                                     |                                    | X                                                  |                     |                                                         | X                                      | X |       | X  |    |                |
| Mandatory urine samples <sup>7, R</sup> (see <a href="#">Section 14.0</a> )                                     |                                    | X                                                  |                     |                                                         | X                                      | X |       | X  |    |                |
| Optional tissue samples <sup>8</sup> (See <a href="#">Section 17.0</a> )                                        |                                    |                                                    |                     | X                                                       |                                        |   |       |    |    |                |
| Mandatory Patient QOL Questionnaire booklet <sup>9</sup> (see <a href="#">Section 4.1</a> )                     |                                    |                                                    |                     |                                                         | X                                      | X | X     | X  | X  | X <sup>8</sup> |
| Functional Independence (see <a href="#">Section 4.2</a> )                                                      |                                    |                                                    |                     |                                                         | X                                      | X | X     | X  | X  | X              |
| Mandatory Patient Neurocognitive Testing Questionnaire booklet <sup>9</sup> (see <a href="#">Section 4.32</a> ) |                                    |                                                    |                     |                                                         | X                                      | X | X     | X  | X  | X <sup>8</sup> |

Footnotes for Table 4.0 appear on the following page

6  
7  
8  
9  
10  
11  
12  
13  
14

16 **Footnotes for Table 4.0**

- 17 1. Patients will continue to be followed per test schedule [even in the event of progressive disease (PD)]  
 18 until withdrawal, refusal, death or 24 months from randomization. In the event of PD in the brain or  
 19 progression of systemic disease, an Evaluation/Observation Form should be completed but patient  
 20 continues to be followed per the test schedule (i.e., complete neurocognitive testing, MRI or CT  
 21 scans, etc.). Follow-up visits are required +/- 14 days for week 12, +/- 1 month for months 6, 9, 12,  
 22 +/- 2 months for month 16, and +/- 4 months for month 24. After 24 months from randomization, an  
 23 Event Monitoring Form should be completed and thereafter every 6 months until 5 years from  
 24 randomization.
- 25 2. All standard tumor-staging procedures necessary to define baseline **extra cranial** disease status (as  
 26 deemed appropriate by the treating oncology physician) completed  $\leq 42$  days prior to pre-registration.
- 27 3. Both pre-operative and post-operative brain scans are required. Pre-operative contrasted MRI or CT  
 28 brain scans must be obtained  $\leq 49$  days prior to pre-registration. Post-operative MRI or CT brain scan  
 29 must be obtained  $\leq 35$  days prior to pre-registration. In the post-operative, pre-randomization setting,  
 30 a CT brain scan is allowed although a post-operative MRI is preferred.
- 31 4. A MRI or CT contrasted brain scan must be obtained  $\leq 28$  days before randomization. Sometimes this  
 32 scan will be used for SRS planning purposes. A pre-randomization MRI scan is not required in two  
 33 circumstances:  
 34 a) The post-operative MRI or CT scan may be used for the randomization scan if obtained  $\leq 28$   
 35 days prior to randomization.  
 36 b) There are no unresected brain metastases (i.e., all brain metastases have been resected). A  
 37 post-operative CT brain scan is sufficient in those circumstances if obtained  $\leq 28$  days prior  
 38 to randomization.
- 39 5. Report **all** adverse events that have occurred since the prior visit including late effects of radiation.
- 40 6. Patient, if female of childbearing potential, must have a negative urine or serum pregnancy test result  
 41  $\leq 7$  days prior to randomization.
- 42 7. Mandatory blood draws and mandatory urine samples will be collected at baseline (after pre-  
 43 registration, but any time prior to treatment), at 12 weeks post randomization, and at 6 and 12  
 44 months following randomization. Kits are required for this collection. (Mayo Clinic Rochester  
 45 will use Special Studies Refer Cards.)
- 46 8. Optional tissue should be submitted  $\leq 30$  days after randomization.
- 47 9. Patient Quality of Life and Neurocognitive Testing questionnaire booklets **must** be used; copies are  
 48 not acceptable for this submission. Please obtain a supply of all necessary booklets before registering  
 49 patients. Booklets should be ordered from CTSU by completing the CTSU Supply Request Form on  
 50 the CTSU website. Questionnaire booklets are to be completed during the scheduled clinic visits  
 51 indicated in the table above and returned to study staff.
- 52 10. If the patient Quality of Life questionnaires and/or the neurocognitive testing questionnaires were  
 53 completed  $\leq 14$  days prior to randomization for clinical reasons, and comply with the standards of the  
 54 testing outlined in the protocol, these results will be allowed (as per protocol, proper documentation is  
 55 required and booklets need to be forwarded) and do not need to be repeated after pre-registration,  
 56 prior to randomization.

- 57 11. **Treatment:**  
58       Cycle 1 = starts day 1 of treatment and ends at week 12 follow up.  
59       **Follow up/Observation:**  
60       Cycle 2 = starts at 12 weeks and ends at 6 month follow up.  
61       Cycle 3 = starts at 6 months and ends at 9 month follow up.  
62       Cycle 4 = starts at 9 months and ends at 12 month follow up.  
63       Cycle 5 = starts at 12 months and ends at 16 month follow up.  
64       Cycle 6 = starts at 16 months and ends at 24 month follow up.  
65
- 66 R Research funded (see [Section 19.0](#)).

67 4.1 Patient Quality of Life (QOL) Questionnaire Booklets  
 68 The Patient Quality of Life (QOL) Questionnaire Booklet contains the FACT-Br,  
 69 Fatigue/Uniscale and the LASA questionnaires ([Appendix III](#)).  
 70

71 **Please obtain a supply of all necessary booklets before registering patients.**

72 Booklets should be ordered from CTSU by completing the CTSU Supply Request Form  
 73 on the CTSU website.

74  
 75 Questionnaire booklets are to be completed during the scheduled clinic visits and  
 76 returned to study staff. Patient and Examiner Questionnaire Booklets **must** be used;  
 77 copies are not acceptable for this submission. Instructions for the administration of the  
 78 QOL patient questionnaire booklets are provided in [Appendix II](#). Briefly, the patient is to  
 79 complete the Patient QOL Questionnaire Booklet, this will require about 10 to 15 minutes  
 80 to complete. Since the patient may experience cognitive deterioration during treatment,  
 81 significant other' (e.g., a spouse) may help the patient complete the questionnaire, if  
 82 necessary. The responder, identified in consultation with the patient and his/her  
 83 physician, will be recorded on the forms. As further measures of possible cognitive  
 84 decline during treatment, physician-assessed ratings will be made of neurological signs  
 85 and symptoms and treatment adverse events  
 86

87 The QOL booklet will be administered at baseline (after pre-registration and prior to  
 88 randomization) and at the beginning of each scheduled study visit after treatment (i.e., at  
 89 12 weeks and at 6, 9, 12, 16 and 24 months post randomization).  
 90

91 Be sure to include the patient's initials and study ID number on the booklet. Retain a  
 92 **copy** of the completed booklet at the treating institution and mail the **original** completed  
 93 booklet to NCCTG Operations Office, Attention: QAS for N107C, Northwest Clinic 3-24  
 94 CC, 200 First Street SW, Rochester, MN 55905  
 95

96 4.2 Functional Independence Form

97 The Functional Independence form contains the Barthel ADL Index and is located in the  
 98 Forms Packet. At baseline (after pre-registration and prior to randomization) and at the  
 99 beginning of each scheduled study visit after treatment (i.e., at 12 weeks and at 6, 9, 12,  
 100 16 and 24 months post randomization), the treating physician or his/her authorized  
 101 designee will rate the patient's functional independence (in consultation with the patient  
 102 and/or caregiver) on the ordinal scale; this will require approximately five minutes.  
 103

104 Be sure to include the patient's initials and study ID number on the form. Retain a **copy**  
 105 of the form at the treating institution and mail the **original** completed form to NCCTG  
 106 Operations Office, Attention: QAS for N107C, Northwest Clinic 3-24 CC, 200 First  
 107 Street SW, Rochester, MN 55905.



- 108 4.3 Neurocognitive Testing  
 109  
 110 4.31 Neurocognitive Testing Certification  
 111 **Note:** Patients **may not** be pre-registered to this study until at least one member  
 112 from the site study team has received certification to perform neurocognitive  
 113 testing.  
 114  
 115 This study requires that the member of the study staff (i.e., physician, nurse,  
 116 CRA, etc.) who will administer the neurocognitive testing to patients be  
 117 credentialed by Dr. Jane Cerhan, Mayo Clinic Rochester or Dr. Elena Farace,  
 118 Penn State Hershey Medical Center . ***Each individual member of the study staff***  
 119 **who will be administering the neurocognitive testing must be credentialed.**  
 120  
 121 4.311 ***Previously Credentialed:***  
 122 Members of site study teams previously credentialed to perform  
 123 neurocognitive testing for any one of the following studies:  
 124  
 125 ACOSOG Z0300;  
 126 ECOG E3F05;  
 127 NCCTG N0574, N0577 or N0874;  
 128 RTOG BR-0018, 0212, 0424, 0525, 0534, 0614, 0834, 0825, 1125  
 129 or the two phase III randomized motexafin gadolinium studies  
 130 (i.e., the SMART trial for lung cancer)  
 131  
 132 do not need to be re-certified for this study but ***are required*** to email  
 133 documentation of the prior certification to the Alliance Regulatory  
 134 Affairs Manager at thaynes2@uchicago.edu.. In this email be sure to  
 135 include the name and number of the prior study, the approximate date of  
 136 the certification and the CTEP site codes of all the institutions the  
 137 credentialing should be registered at. The CTEP site code will consist of  
 138 5 characters; the first two are the state where the institution is located and  
 139 the last three are digits (i.e., Mayo Clinic in Rochester, Minnesota is  
 140 MN026). The Alliance Regulatory Manager will email notice of the  
 141 certification to the CTSU Regulatory Office. The CTSU will list the  
 142 certification on the CTSU Regulatory Support System (RSS). Study  
 143 teams may check the status of their certification by logging into the  
 144 CTSU website, clicking the blue ‘Regulatory’ tab then clicking the beige  
 145 ‘Site Registration’ tab then entering the CTEP site code and protocol  
 146 number N107C in the search boxes and clicking ‘Go’.  
 147  
 148 Even for previously certified individuals, reviewing [Appendix IV](#)  
 149 Administration Procedures for Neurocognitive Testing in the protocol  
 150 and reviewing the N107C neurocognitive testing training video posted on  
 151 the CTSU website is highly recommended. If several months pass  
 152 between neuropsychological administrations, additional practice with  
 153 volunteers is recommended.

154  
155  
156  
157  
158  
159  
160  
161  
162  
163  
164  
165  
166  
167  
168  
169  
170  
171  
172  
173  
174  
175  
176  
177  
178  
179  
180  
181  
182  
183  
184  
185  
186  
187  
188  
189  
190  
191  
192  
193  
194  
195  
196  
197  
198  
199  
200  
201  
202  
203  
204

4.312 ***Not Previously Credentialed:***

Any individual member of a site study team who wishes to perform neurocognitive testing ***is required to*** be credentialed. Credentialing is specific to one individual person; it does not certify an entire study site or study team. If not previously credentialed, the study team member must follow this process:

Review [Appendix IV](#) Administration Procedures for Neurocognitive Testing in the protocol. Please have access to this document while you view the N107C neurocognitive testing training video posted on the CTSU website. Please allow enough time for the video to download. If you have difficulties downloading the video, please check with your institution’s computer support/help desk ***first*** before contacting the CTSU Help Desk..

Complete the “Neurocognitive Booklet for Certification Use Only.” The booklet includes a brief quiz and a practice test. Complete the practice test with a colleague (***not*** a patient).

Scan and email a copy of the ***entire booklet*** to Dr. Cerhan. as she will review the certification booklet. If there are concerns, she will email or call the member of the site study team to review. If there are no concerns, she will confirm the site study team member’s certification by email and copy the Alliance Regulatory Affairs Manager at [thaynes2@uchicago.edu](mailto:thaynes2@uchicago.edu).. The Alliance Regulatory Affairs Manager will email notice of the certification to the CTSU Regulatory Office. The CTSU will list the certification on the CTSU Regulatory Support System (RSS). Study teams may check the status of their certification by logging into the CTSU website, clicking the blue ‘Regulatory’ tab then clicking the beige ‘Site Registration’ tab then entering the CTEP site code and protocol number N107C in the search boxes and clicking ‘Go’.

If there are questions about testing procedures, please contact Dr. Cerhan at the telephone number or email address listed on the Protocol Resource page.

Credentialing does not expire. However, if a number of months go by between testing patients, please ensure readiness to test by reviewing [Appendix IV](#) Administration Procedures for Neurocognitive Testing in the protocol and/or viewing the training video posted on the CTSU website and/or performing practice testing with a colleague.

4.32 Ordering of Neurocognitive Certification and Patient Neurocognitive Testing Booklets

The study site should obtain all necessary neurocognitive certification and neurocognitive patient testing questionnaire booklets ***before pre-registering patients***. Booklets should be ordered from CTSU by completing the CTSU Supply Request Form on the CTSU website. Note: CTSU will not send questionnaire booklets until the site has submitted a copy of their IRB approval excerpt to the CTSU Regulatory Office. Neurocognitive certification and

205 neurocognitive patient testing questionnaire booklets must be used; copies are not  
 206 acceptable for submission. Neurocognitive patient testing questionnaire booklets  
 207 are to be completed and returned to site study staff during the scheduled clinic  
 208 visits.

209  
 210 4.33 Timing of Neurocognitive Testing  
 211 Baseline neurocognitive testing will be performed following the surgical  
 212 procedure but before beginning treatment and thereafter as outlined in Table 4.0.

213  
 214 4.34 Neurocognitive Tests Format  
 215 The credentialed site study team member will administer the neurocognitive tests  
 216 to the patient using the patient questionnaire titled “Neurocognitive Examiners  
 217 Booklet”. There are six different versions of the questionnaires labeled form 1,  
 218 form 2, form 3, form 4, form 5 and form 6. Each questionnaire has a unique  
 219 version of the Hopkins Verbal Learning Test (HVLT) to prevent patient recall  
 220 from a prior test. The questionnaire booklet requires approximately 20 to 30  
 221 minutes to complete and includes the following tests:

222  
 223 *Memory:* Hopkins Verbal Learning Test (HVLT) (Brandt 1991).

224 *Fluency:* Controlled Oral Word Association Test from the Multilingual  
 225 Aphasia Examination (COWAT) (Benton and Hamsher 1978).

226 *General Mental Ability:* Trail Making Test A and B (Reitan 1958).

227 *Delayed Memory:* Recall and Recognition of Word List encoded from the  
 228 HVLT (Brandt 1991).

229  
 230 If the credentialed site study team member administering the neurocognitive tests  
 231 has questions or is unsure about a patient's ability to complete the Trail Making  
 232 Test A and B, please contact Dr. Cerhan as adjustments may be made depending  
 233 on the patient's situation.

234  
 235 4.35 Submission of the Completed Neurocognitive Test Questionnaires  
 236 Completed test forms must be signed by the credentialed site study team member  
 237 administering the neurocognitive tests. Be sure to include the patient’s initials  
 238 and study ID number on the Neurocognitive Booklet. Retain *a copy* of the  
 239 completed neurocognitive booklet at the treating institution and *mail the original*  
 240 of the completed booklet to NCCTG Operations Office, Attention: QAS for  
 241 N107C, NW Clinic 3-24 CC, 200 First Street SW, Rochester, MN 55905

242  
 243 Please be sure to fax the Neurocognitive Evaluations Submission Fax Form  
 244 ([Appendix VI](#)) to the QAS for N107C at (507) 266-7240.  
 245

246 4.36 Quality Control for Patient Neurocognitive Testing Booklets  
 247 Throughout the study, Dr. Cerhan will review all patient questionnaire booklets  
 248 for quality control purposes. Procedural deviations will be identified and the site  
 249 study team member performing the neurocognitive testing will be notified of the  
 250 results of the review as needed. If significant procedural variations are noted, re-  
 251 training of the test administrator will be required. Completed patient  
 252 questionnaire booklets should be mailed to NCCTG as soon as possible to ensure  
 253 that the quality control review can be done in a timely manner.

254 4.4 SRS Credentialing  
 255 In order to utilize Stereotactic Radiosurgery (SRS) with a Gamma Knife or Linear  
 256 Accelerator on this study, the institution must have met specific technology requirements  
 257 and have provided baseline physics information. Instructions for completing these  
 258 requirements are available on the IROC Houston’s website at  
 259 <http://irochouston.mdanderson.org> click ‘Credentialing’ then ‘NCCTG.’ To determine if  
 260 these requirements have already been met by your institution, select “Credentialing Status  
 261 Inquiry.”

262  
 263 4.41 SRS Questionnaire

264 An SRS questionnaire must be completed and submitted, or if the  
 265 questionnaire has been previously submitted, must be updated by the  
 266 institution and submitted to the IROC Houston Quality Assurance Center  
 267 electronically from the IROC Houston’s website for review. The  
 268 questionnaire is available on the IROC Houston’s website,  
 269 <http://irochouston.mdanderson.org> , under ‘Credentialing.’

270  
 271 4.42 SRS Phantom Study

272 An SRS phantom study with the IROC Houston Quality Assurance must  
 273 be successfully completed. If an institution has previously been  
 274 credentialed to enter patients onto earlier NCCTG SRS protocols and  
 275 their treatment equipment has not changed since the initial  
 276 credentialing, the institution is not required to perform the phantom  
 277 irradiation study. However, if the institution’s treatment equipment has  
 278 changed, then they will be required to re-credential by performing the  
 279 phantom irradiation study. Institutions that previously had only  
 280 completed the SRS questionnaire to be credentialed for NCCTG SRS  
 281 protocols are strongly encouraged to perform a phantom irradiation study  
 282 during their participation in this protocol. Instructions for requesting and  
 283 irradiating the phantom are available on the IROC Houston’s website at  
 284 <http://irochouston.mdanderson.org> ; select ‘Credentialing’ then  
 285 ‘NCCTG’. Upon review and successful completion of the phantom  
 286 irradiation, the IROC Houston Quality Assurance Center will notify the  
 287 Alliance Regulatory Affairs Manager at [thaynes2@uchicago.edu](mailto:thaynes2@uchicago.edu) of the  
 288 site’s SRS credentialing. The Alliance Regulatory Affairs Manager will  
 289 record and then forward this information to the CTSU Regulatory Office.  
 290 Study teams may check the status of their certification by logging into  
 291 the CTSU website, clicking the blue ‘Regulatory’ tab then clicking the  
 292 beige ‘Site Registration’ tab then entering the CTEP site code and  
 293 protocol number N107C in the search boxes and clicking ‘Go’.

294  
 295 **Note:** The above credentialing requirements are a change in the “Site  
 296 Registration Requirements” as compared to previous NCCTG  
 297 requirements. If a center’s radiosurgery unit was credentialed for  
 298 N0574 or an RTOG brain SRS protocol by successfully  
 299 irradiating and passing the SRS phantom study and their  
 300 treatment equipment has not changed, the site **does not** need to  
 301 be re-credentialed for this study. If you are unsure of your status  
 302 go to the IROC Houston’s website at  
 303 <http://irochouston.mdanderson.org>; select “Credentialing” and  
 304 then “NCCTG.” To determine if these requirements have already

305 309 been met by your institution, select “Credentialing Status  
 306 310 Inquiry.”

307 **5.0 Stratification Factors**

- 311 5.1 Age
- 312 < 60 years vs. ≥ 60 years
- 313
- 314
- 315 5.2 Extra-Cranial Disease Controlled
- 316 ≤ 3 months vs. > 3 months.
- 317
- 318 5.3 Number of Pre-operative Brain Metastases
- 319 1 vs. 2 to 4
- 320
- 321 5.4 Histology
- 322 Lung vs. Radioresistant vs. other
- 323 **Note:** Radioresistant is defined as brain metastases from a sarcoma, melanoma, or renal
- 324 cell carcinoma histology.
- 325
- 326 5.5 Resection cavity maximal diameter
- 327 ≤ 3cm vs. > 3cm
- 328

329 **6.0 Registration/Randomization Procedures**

330 This study is supported by the NCI Cancer Trials Support Unit (CTSU).

- 331 6.1 Pre-Registration (Step 1)
- 332
- 333 6.11 Investigator Registration
- 334 Prior to the recruitment of a patient for this study, investigators must be
- 335 registered members of the CTSU. Each investigator must have an NCI
- 336 investigator number and must maintain an “active” investigator registration status
- 337 through the annual submission of a complete investigator registration packet
- 338 (FDA Form 1572 with original signature, current CV, Supplemental Investigator
- 339 Data Form with signature, and Financial Disclosure Form with original
- 340 signature) to the Pharmaceutical Management Branch (PMB), CTEP, DCTD,
- 341 NCI. These forms are available on the members section of the CTSU website or
- 342 by calling the PMB at (240) 276-6575 Monday through Friday between 8:30 a.m.
- 343 and 4:30 p.m. Eastern time.
- 344
- 345
- 346 6.12 Site Registration Requirements – IRB Approval
- 347
- 348 6.121 Site IRB Approval
- 349 Each investigator or group of investigators at a clinical site must obtain
- 350 IRB approval for this protocol and submit IRB approval and supporting
- 351 documentation to the CTSU Regulatory Office before they can enroll
- 352 patients. Study teams may check the status of their site by logging into
- 353 the CTSU website, clicking the blue ‘Regulatory’ tab then clicking the
- 354 beige ‘Site Registration’ tab then entering the CTEP site code and
- 355 protocol number N107C in the search boxes and clicking ‘Go’.
- 356
- 357 6.122 Continuing IRB Review
- 358 In addition to submitting initial IRB approval documents, ongoing IRB

359 approval documentation must be on file (no less than annually). If the  
 360 necessary documentation is not submitted in advance of attempting  
 361 patient pre-registration, the pre-registration will not be accepted and the  
 362 patient may not be enrolled in the protocol until the situation is resolved.  
 363

364 6.123 End of Continuing IRB Review  
 365 When the study has been permanently closed to patient enrollment,  
 366 submission of annual IRB approvals to the CTSU is no longer necessary.  
 367

368 6.13 Site Registration Requirements – RTFI Form Submission to CTSU  
 369 As per NCI policy, all radiation therapy facilities participating in NCI sponsored  
 370 protocols must be active in the IROC Houston Quality Assurance monitoring  
 371 program. For institutions enrolling through the CTSU, a Radiation Therapy  
 372 Facilities Inventory (RTFI) form must be on file with the CTSU. CTSU requires  
 373 a one-time submission of the RTFI form for each study for each facility used by a  
 374 site. If the RTFI has been previously submitted to the CTSU, it does not need to  
 375 be resubmitted unless updates have occurred at the facility. A copy of the RTFI  
 376 may be downloaded from the CTSU website and submitted to the CTSU  
 377 Regulatory Office.  
 378

379 6.14 Access Requirements for Oncology Patient Enrollment Network (OPEN)  
 380

381 6.141 Site staff will need to be registered with CTEP and have a valid and  
 382 active CTEP-IAM account. This is the same account (user id and  
 383 password) used for the CTSU members’ web site.  
 384

385 6.142 To perform pre-registrations, the site user must have been assigned the  
 386 ‘Registrar’ role on the relevant Group or CTSU roster.  
 387

388 6.143 To perform pre-registrations on protocols for which you are a member of  
 389 the Lead Group (i.e.,Alliance), you must have an equivalent ‘Registrar’  
 390 role on the Lead Group (i.e., Alliance) roster. Role assignments are  
 391 handled through the Groups in which you are a member.  
 392

393 6.144 To perform pre-registrations to trials accessed via the CTSU mechanism  
 394 (i.e., non-Lead Group pre-registrations) you must have the role of  
 395 Registrar on the CTSU roster. Site and/or Data Administrators can  
 396 manage CTSU roster roles via the new Site Roles maintenance feature  
 397 under RSS on the CTSU members' web site. This will allow them to  
 398 assign staff the "Registrar" role.  
 399

400 **NOTE:** *The OPEN system will provide the site with a printable confirmation of*  
 401 *pre-registration and treatment information. Please print this*  
 402 *confirmation for your records.*  
 403

404 Further instructional information is provided on the OPEN tab of the CTSU  
 405 members’ side of the CTSU website at <https://www.ctsus.org> or at  
 406 <https://open.ctsus.org>. For any additional questions, contact the CTSU Help Desk  
 407 at 1-888-823-5923 or [ctsuscontact@westat.com](mailto:ctsuscontact@westat.com).  
 408

6.15 Patient Pre-Registration (Step 1)

- 409 6.151 Patient pre-registration can occur only after pre-treatment evaluation is  
 410 complete, eligibility criteria have been met, and the study site is listed as  
 411 ‘approved’ in the CTSU RSS. Patients must have signed and dated all  
 412 applicable consents and authorization forms.  
 413
- 414 6.152 All site staff will use OPEN to enroll patients to this study. Each site  
 415 will need to credit their existing affiliated Cooperative Group for the  
 416 enrollment. OPEN can be accessed at <https://open.ctsu.org> or from the  
 417 OPEN tab on the CTSU members’ side of the website at  
 418 <https://www.ctsu.org>.  
 419
- 420 6.153 Prior to accessing OPEN, site staff must verify the following:  
 421
- 422 • All eligibility criteria must have been met within the protocol  
 423 stated timeframes. Site staff should use the pre-registration forms  
 424 provided on the Alliance or CTSU web site as a tool to verify  
 425 eligibility.  
 426
  - 427 • All patients must have signed an appropriate consent form and  
 428 HIPAA authorization form (if applicable).  
 429
- 430 6.154 Correlative Research  
 431 Mandatory Urine and Blood Samples  
 432 A mandatory correlative research component for blood and urine is part  
 433 of this study, the patient will be automatically registered onto this  
 434 component (see [Sections 3.19f](#) and [14.0](#)).  
 435
- 436 6.155 Patient Permission for Biospecimen Use  
 437 At the time of randomization, the following will be recorded:  
 438
- 439 • Patient has/has not given permission to store and use his/her  
 440 **blood sample(s)** for use in future research to learn about,  
 441 prevent, or treat cancer.  
 442
  - 443 • Patient has/has not given permission to store and use his/her  
 444 **blood sample(s)** for use in future research to learn about,  
 445 prevent, or treat other health problems (for example: diabetes,  
 446 Alzheimer’s disease, or heart disease).  
 447
  - 448 • Patient has/has not given permission for Alliance to give his/her  
 449 stored **blood sample(s)** for use in future research to outside  
 450 researchers.  
 451
  - 452 • Patient has/has not given permission to store and use his/her  
 453 **urine sample(s)** for use in future research to learn about,  
 454 prevent, or treat cancer.  
 455
  - 456 • Patient has/has not given permission to store and use his/her  
 457 urine sample(s) for use in future research to learn about, prevent,  
 458 or treat other health problems (for example: diabetes,  
 459 Alzheimer’s disease, or heart disease).

- 460 • Patient has/has not given permission for Alliance to give his/her
- 461 stored urine sample(s) for use in future research to outside
- 462 researchers.
- 463
- 464 • Patient has/has not given permission to store and use his/her
- 465 tissue sample(s) for use in future research to learn about, prevent,
- 466 or treat cancer.
- 467
- 468 • Patient has/has not given permission to store his/her tissue
- 469 sample(s) for use in future research to learn about, prevent, or
- 470 treat other health problems (for example: diabetes, Alzheimer’s
- 471 disease, or heart disease).
- 472
- 473 • Patient has/has not given permission for Alliance to give his/her
- 474 stored tissue sample(s) for use in future research to outside
- 475 researchers.
- 476
- 477 6.156 Completion of Pre-treatment Tests/Procedures
- 478 Pretreatment tests/procedures must be completed prior to pre-registration
- 479 within the guidelines specified on the test schedule (see [Section 4.0](#)).
- 480
- 481
- 482 6.157 Grading of Baseline Symptoms
- 483 All required baseline symptoms (see [Section 10.51](#)) must be documented
- 484 and graded.
- 485
- 486
- 487 6.158 Confirmation of Eligibility
- 488 A radiation oncologist has seen the patient and confirms the patient is a
- 489 suitable candidate for this study.
- 490
- 491 6.159a Blood and Urine Kits
- 492 Blood and urine kits available on site.
- 493
- 494 6.159b Patient Questionnaire Booklets
- 495 Quality of Life (QOL) questionnaire booklets and Patient
- 496 Neurocognitive Testing questionnaire booklet – Neurocognitive
- 497 Evaluations are available on site; copies are not acceptable for this
- 498 submission.
- 499 6.2 Registration/Randomization (Step 2)
- 500
- 501 6.21 Randomization Using OPEN
- 502 If the randomization scan has been obtained, sites should access OPEN
- 503 to randomize (Step 2) the patient. OPEN can be accessed at
- 504 <https://open.ctsu.org> or from the OPEN tab on the CTSU members’ side
- 505 of the website at <https://www.ctsu.org>.
- 506
- 507 6.22 Verification of Registration Requirements
- 508 Prior to accepting the registration/randomization, the
- 509 registration/randomization application will verify the following:



- 510                                   • IRB approval at the registering institution
- 511                                   • Patient eligibility
- 512                                   • Existence of a signed consent form
- 513                                   • Existence of a signed authorization for use and disclosure of
- 514                                   protected health information (*USA institutions only*)
- 515
- 516                           6.23   Stratification Factors
- 517                                   The factors defined in [Section 5.0](#), together with the registering
- 518                                   membership, will be used as stratification factors.
- 519
- 520                           6.24   Randomization Groups
- 521                                   The patient will be assigned to one of the following treatment groups
- 522                                   using the Pocock and Simon dynamic allocation procedure which
- 523                                   balances the marginal distributions of the stratification factors between
- 524                                   the treatment groups (Pocock and Simon 1975).
- 525                                   Arm A:   WBRT
- 526                                   Arm B:   SRS to surgical bed
- 527
- 528                           6.25   Start of Treatment
- 529                                   Treatment cannot begin prior to randomization and must begin  $\leq 21$  days
- 530                                   after randomization.
- 531
- 532                           6.26   Treating Physician and Site
- 533                                   Treatment on this protocol must commence at the accruing membership
- 534                                   under the supervision of an Alliance or CTSU member physician.
- 535
- 536   **7.0    Protocol Treatment**
- 537
- 538           7.1    Prior to Treatment
- 539
- 540                   7.11   Baseline QOL, Functional Independence and Neurocognitive Tests
- 541                           After informed consent is obtained from the patient and prior to randomization,
- 542                           baseline QOL, functional independence, and neurocognitive tests must be
- 543                           completed.
- 544
- 545                   7.12   Performance of SRS at a Site Other than the Registering Site
- 546                           The radiosurgery can be delivered at a different site than the site registering the
- 547                           patient as long as treatment guidelines are followed and the site delivering the
- 548                           SRS has been credentialed for SRS by the IROC Houston Quality Assurance
- 549                           Center.
- 550                           Note: Please inform IROC Houston Quality Assurance Center and Alliance that
- 551                           your site will register the patient and perform SRS at another site; please include
- 552                           the sites' names and CTEP site codes. Without this information, CTSU may
- 553                           delay the registration of the patient as it would have no SRS credentialing on file
- 554                           for the registering site.
- 555
- 556                   7.13   SRS Dose
- 557                           The SRS dose has been selected in order to provide a high rate of local control
- 558                           with minimum risk of radionecrosis. The SRS dose is decreased modestly for
- 559                           larger lesions in order to account for the volume effect on complication rates.

- 560 7.14 Cytotoxic Chemotherapy Prohibited During SRS and WBRT  
 561 Cytotoxic chemotherapy is not allowed during the SRS or during the WBRT.  
 562 Chemotherapy may start immediately following SRS and/or WBRT.  
 563
- 564 7.15 Timing of SRS and WBRT  
 565 Patients must initiate radiotherapy/radiosurgery treatment  $\leq 21$  days after  
 566 registration.  
 567
- 568 7.2 Whole Brain Radiation Therapy (WBRT) Guidelines (For **ARM A Only**)  
 569  
 570 ***Radiation therapy for patients on this protocol can only be delivered at facilities which***  
 571 ***are approved by your cooperative group.***  
 572  
 573 For unresected brain metastases see [Section 7.4](#).  
 574
- 575 7.21 Equipment  
 576
- 577 7.211 Modality  
 578 X-ray beams with a nominal energy between 4 and 6 MV.  
 579
- 580 7.212 Calibration  
 581 The calibration of therapy machines to deliver WBRT used in this study  
 582 shall be verified by the IROC Houston Quality Assurance Center.  
 583
- 584 7.22 Target Volume  
 585
- 586 7.221 Definition  
 587 The target volume consists of the entire brain and meninges, including  
 588 the frontal lobe as well as the posterior halves of the globes of the eyes,  
 589 with the optic disk and nerve, superior to the vertex, and posterior to the  
 590 occiput. The caudal border shall be below the skull base at the top of the  
 591 C2 vertebral level.  
 592
- 593 7.222 Localization  
 594 The planning target volume shall be defined by means of a simulator.  
 595
- 596 7.23 Target Dose  
 597
- 598 7.231 Prescription Point  
 599 The prescription point in the cranial volume is at or near the center. For  
 600 multi-convergent beams, the prescription point is usually at the  
 601 intersection of the beam axes.  
 602 **Note:** Regardless of the location of the central axis, the dose should be  
 603 prescribed at the center on the cranial volume (midway between  
 604 the maximum separation).  
 605
- 606 7.232 Dose Definition  
 607 The absorbed dose is specified below in Gy to muscle (or water).  
 608
- 609 7.233 Tissue Heterogeneity  
 610 Corrections for tissue heterogeneity are allowed.

- 611 7.234 Prescribed dose and fractionation  
 612 Sites performing radiation therapy must predetermine one of the two  
 613 fractionation schedules that will be utilized for N107C for **all** patient  
 614 randomized at the site. A site may choose a total dose to the prescription  
 615 point is 3750 cGy. This dose is delivered in 15 fractions of 2.5 Gy. The  
 616 alternative choice for a site is a total dose to the prescription point of  
 617 3000 cGy delivered in ten fractions of 3 Gy each. All radiation fields  
 618 shall be treated once each day. If possible, the treatment shall be given 5  
 619 days a week.  
 620  
 621 7.235 Dose Uniformity  
 622 The dose variations in the target volume shall be within +7% (-5% of the  
 623 prescription-point dose).  
 624  
 625 7.236 Treatment Interruptions  
 626 No corrections shall be made for treatment interruptions less than or  
 627 equal to seven days. For interruptions greater than seven days, please  
 628 contact Dr. Paul Brown (See title page).  
 629  
 630 7.24 Treatment Technique  
 631  
 632 7.241 Patient Position  
 633 It is recommended that the patient be treated supine.  
 634  
 635 7.242 Beam Configuration  
 636 The cranial volume is typically treated with two lateral, equally weighted  
 637 photon beams. The fields shall extend at least 1 cm beyond the periphery  
 638 of the scalp. “Compensating beams” that block hot spots (these hot spots  
 639 are typically present along the midline due to less tissue present in these  
 640 regions compared to mid-brain) are allowed to achieve better dose  
 641 homogeneity. In addition, forward planned field in field radiotherapy is  
 642 allowed to decrease hot spots. However intensity modulated radiotherapy  
 643 which by definition involves inverse planning is not allowed.  
 644  
 645 7.243 Field Shaping  
 646 Field Shaping shall be done with blocks that are at least 5 half-value  
 647 layers (HVL) thick. Multi-leaf collimation is allowed.  
 648  
 649 7.25 Treatment Timing  
 650  
 651 7.251 No Unresected Brain Metastases  
 652 Patients must initiate radiotherapy  $\leq$  21 days after randomization.  
 653  
 654 7.252 Unresected Brain Metastases Present  
 655 Patients must initiate radiosurgery or radiotherapy  $\leq$  21 days after  
 656 randomization. The preferred approach is radiosurgery to unresected  
 657 brain metastases followed by WBRT. Regardless completion of one  
 658 treatment dictates initiation of the other treatment within 14 days. For  
 659 example after SRS to unresected brain metastases, WBRT must start  
 660 within 14 days of completion of SRS.

- 661 7.253 Quality Control and Definitions of Deviations  
 662 Quality control and deviations will be done according to the guidelines in  
 663 [Appendix VII](#). All plans and associated materials as per NCCTG  
 664 standards will be reviewed by 2 radiation oncologists and the IROC  
 665 Houston Quality Assurance Center.  
 666
- 667 7.3 Stereotactic Radiosurgery (SRS) to Surgical Bed Guidelines (For **ARM B Only**)  
 668 *Radiosurgery for patients on this protocol can only be performed at IROC Houston*  
 669 *Quality Assurance Center credentialed facilities. See protocol [Section 4.4](#) for details.*  
 670
- 671 For unresected brain metastases see [Section 7.4](#).  
 672
- 673 If all lesions cannot be treated on the same day, all lesions MUST be treated  $\leq 7$  days of  
 674 treatment of the first lesion. The radiosurgery can be delivered at a different site than the  
 675 site registering the patient (see [Section 7.12](#)).  
 676
- 677 7.31 Medications  
 678 Patients may be given an intravenous bolus dose of 8 to 16 mg of dexamethasone  
 679 or 40 to 80 mg of SoluMedrol at the time of SRS, at the discretion of the treating  
 680 physician.  
 681
- 682 7.32 Equipment  
 683
- 684 7.321 Modality  
 685 Gamma knife or X-rays with nominal energy of 4 megavoltage (MV) or  
 686 greater for accelerator-based treatments, including isocentric conical  
 687 collimators, mini-multi-leaf (5 mm or less) technology or linear  
 688 accelerators mounted on robotic arms.  
 689
- 690 7.322 Calibration  
 691 The calibration of linear accelerators used in this study shall be verified  
 692 by the IROC Houston Quality Assurance Center.  
 693
- 694 7.33 Target Volume Definitions  
 695 The volumes shall be defined by a planning MRI or CT brain scan. ICRU-50 and  
 696 supplement (ICRU-62) nomenclature target volumes are defined as follows:  
 697
- 698 7.331 Clinical Tumor Volume (CTV2)  
 699 This is defined as the surgical cavity (CTV1) with a 2 mm margin as  
 700 seen on planning MRI or CT scan. However this 2 mm margin does not  
 701 need to expand into structures that typically are not at risk of tumor  
 702 infiltration from brain metastases such as bone. The surgical access track  
 703 for deep lesions will not be specifically targeted. The maximal cross-  
 704 sectional diameter of the surgical cavity must be  $< 5.0$  cm.  
 705
- 706 7.34 Target Dose  
 707
- 708 7.341 Prescription Specification  
 709 The dose should be prescribed to the highest isodose line encompassing  
 710 the CTV2 (surgical cavity plus 2 mm – see [Section 7.331](#)), which can  
 711 range from 50% to 90% of the maximum dose.

712  
713  
714  
715  
716  
717  
718  
719

7.342 Dose Definition  
Dose is specified in Gray (Gy) to muscle.

7.343 Prescription Dose  
The total prescribed dose is determined by surgical cavity volume (CTV1). The volume determines dose due to the often irregular shape of surgical cavities:

| <b>Arm B (SRS):</b>                      |
|------------------------------------------|
| Lesions < 4.2 cc receive 20 Gy           |
| Lesions ≥ 4.2 to < 8.0 cc receive 18Gy   |
| Lesions ≥ 8.0 to < 14.4 cc receive 17 Gy |
| Lesions ≥ 14.4 to < 20 cc receive 15 Gy  |
| Lesions ≥ 20 to < 30 cc receive 14 Gy    |
| Lesions ≥ 30 cc to < 5cm max 12 Gy       |

720  
721  
722  
723  
724  
725  
726  
727

7.344 Dose Conformity  
The ratio of the prescription isodose volume to the target volume (CTV2) should be between 1.0 and 2.0. It is understood that this ratio may be difficult to achieve with some very small lesions. For lesions less than 5 mm in size, a ratio up to 3.0 is acceptable. See Radiation Therapy Quality Control Guidelines ([Appendix VII](#)).

728  
729  
730  
731

7.35 Treatment Technique  
An immobilization/patient localization system is mandatory for this study. Multiple isocenter and non-isocentric techniques are permitted.

732  
733  
734  
735  
736  
737

7.36 Normal Tissue and Critical Structures  
The treatment parameters should be modified to optimize the fit of the prescription volume to the target volume while minimizing dose to critical structures. The maximum point dose to the optic chiasm should be less than 9 Gy. No more than 1cc of the brain stem should exceed 12 Gy.

738  
739

7.37 Dose Calculation and Reporting

740  
741  
742  
743

7.371 Treatment Time  
The monitor units or time required to deliver the prescribed dose shall be calculated and submitted.

744  
745  
746  
747

7.372 Dose Uniformity  
The maximum and minimum doses in the CTV shall be calculated and reported. These may be extracted from isodose distributions, calculated separately or derived from Dose Volume Histograms (DVHs).

748  
749  
750  
751  
752  
753

7.373 Conformity Index  
The PITV, defined as the ratio of the prescription isodose volume to the target volume (CTV2), shall be calculated and reported. If the prescription isodose volume is calculated from a DVH, that DVH shall be submitted (see [Section 18.0](#) Records and Data Collection Procedures) and Radiation Therapy Quality Control Guidelines ([Appendix VII](#)).

- 754 7.374 Prescription Isodose Line  
 755 The total dose delivered to the prescription isodose line shall be  
 756 calculated and reported.  
 757
- 758 7.375 Normal Tissue and Critical Organ Dose Points  
 759 Documentation of the highest point dose to the optic chiasm or a DVH of  
 760 the optic chiasm shall be submitted (see [Section 18.0](#) Records and Data  
 761 Collection Procedures ) and Radiation Therapy Quality Control  
 762 Guidelines ([Appendix VII](#)).  
 763
- 764 7.376 Isodose Distribution  
 765 A hard copy of the isodose distribution for each target must be  
 766 submitted. Isodose distributions should be displayed on three orthogonal  
 767 planes or, if not possible, on multiple transverse slices through each  
 768 target.  
 769
- 770 7.4 Guideline for *Unresected* Brain Metastases  
 771 **For BOTH ARMS A and B;** however SRS doses to **unresected** brain metastases will be  
 772 different between treatment arms.  
 773  
 774 *Radiosurgery for patients on this protocol can only be performed at IROC Houston*  
 775 *Quality Assurance Center credentialed facilities. See protocol [Section 4.4](#) for details.*  
 776
- 777 If all lesions cannot be treated on the same day, all lesions MUST be treated  $\leq 7$  days of  
 778 treatment of the first lesion. The radiosurgery can be delivered at a different site than the  
 779 site registering the patient (see [Section 7.12](#)).  
 780
- 781 7.41 Medications  
 782 Patients may be given an intravenous bolus dose of 8 to 16 mg of dexamethasone  
 783 or 40 to 80 mg of SoluMedrol at the time of SRS, at the discretion of the treating  
 784 physician.  
 785
- 786 7.42 Equipment  
 787  
 788 7.421 Modality  
 789 Gamma knife or X-rays with nominal energy of 4 megavoltage (MV) or  
 790 greater for accelerator-based treatments, including isocentric conical  
 791 collimators, mini-multi-leaf (5 mm or less) technology or linear  
 792 accelerators mounted on robotic arms.  
 793
- 794 7.422 Calibration  
 795 The calibration of linear accelerators used in this study shall be verified  
 796 by the IROC Houston Quality Assurance Center.  
 797
- 798 7.43 Target Volume Definitions  
 799  
 800 7.431 The volumes shall be defined by a planning MRI or CT brain scan.  
 801 ICRU-50 and supplement (ICRU-62) nomenclature target volumes are  
 802 defined as follows:

803 7.432 Gross Clinical Tumor Volume (CGTV)  
 804 This is defined as the contrast enhanced tumor seen on planning MRI or  
 805 CT scan. The maximal cross-sectional diameter must be < 3.0 cm.  
 806

807 7.433 Clinical Target Volume (CTV)  
 808 This is defined as the GTV for this study. Typically there will be no  
 809 expansion of GTV to create CTV, but an optional 1mm expansion of  
 810 GTV is allowed when defining the CTV.  
 811

812 7.44 Target Dose

813 Prescription Specification

814 The dose should be prescribed to the highest isodose line encompassing  
 815 the CTV, which can range from 50% to 90% of the maximum dose.  
 816

817 Dose Definition

818 Dose is specified in Gray (Gy) to muscle.  
 819

820 Prescription Dose

821 The total prescribed dose is determined by treatment arm and tumor size  
 822 (maximal diameter).  
 823  
 824

|                                                                                                                       |
|-----------------------------------------------------------------------------------------------------------------------|
| <b>Arm A (WBRT):</b>                                                                                                  |
| SRS for unresected brain metastases:                                                                                  |
| Lesions <1.0 cm receive 22 Gy                                                                                         |
| Lesions ≥1 – <2.0 cm receive 20 Gy                                                                                    |
| Lesions ≥2 – <3.0 cm receive 18 Gy                                                                                    |
| WBRT:<br>Refer to prescribed dose and fractionation in<br>Whole Brain Radiation Therapy (WBRT)<br>Guidelines section. |

825

|                                      |
|--------------------------------------|
| <b>Arm B (SRS only):</b>             |
| SRS for unresected brain metastases: |
| Lesions <1.0 cm receive 24 Gy        |
| Lesions ≥1 – <2.0 cm receive 22 Gy   |
| Lesions ≥2 – <3.0 cm receive 20 Gy   |

826

827 Dose Conformity

828 The ratio of the prescription isodose volume to the target volume (CTV)  
 829 should be between 1.0 and 2.0. It is understood that this ratio may be  
 830 difficult to achieve with some very small lesions. For lesions less than 5  
 831 mm in size, a ratio up to 3.0 is acceptable. See Radiation Therapy  
 832 Quality Control Guidelines ([Appendix VII](#)).  
 833

834 Planning MRI or CT scan

835 If at the time of planning MRI or CT scan for SRS more than 3  
 836 unresected brain metastases are noted, the patient should remain on  
 837 study. If SRS is performed, the dosing guidelines 7.443 should be  
 838 followed. Also see [Section 13](#) and contact Study Chairs for guidance as  
 needed.

- 839 7.45 Treatment Technique  
 840 An immobilization/patient localization system is mandatory for this study.  
 841 Multiple isocenter and non-isocentric techniques are permitted.  
 842
- 843 7.46 Normal Tissue/Critical Structures  
 844 The treatment parameters should be modified to optimize the fit of the  
 845 prescription volume to the target volume while minimizing dose to critical  
 846 structures. The maximum point dose to the optic chiasm should be less than 9  
 847 Gy. No more than 1cc of the brain stem should exceed 12 Gy.  
 848
- 849 7.47 Dose Calculation and Reporting  
 850
- 851 Treatment Time  
 852 The monitor units or time required to deliver the prescribed dose shall be  
 853 calculated and submitted.  
 854
- 855 Dose Uniformity  
 856 The maximum and minimum doses in the CTV shall be calculated and  
 857 reported. These may be extracted from isodose distributions, calculated  
 858 separately or derived from Dose Volume Histograms (DVHs).  
 859
- 860 Conformity Index  
 861 The PITV, defined as the ratio of the prescription isodose volume to the  
 862 target volume, shall be calculated and reported. If the prescription  
 863 isodose volume is calculated from a DVH, that DVH shall be submitted  
 864 (see [Section 18.0](#) Records and Data Collection Procedures) and  
 865 Radiation Therapy Quality Control Guidelines ([Appendix VII](#)).  
 866
- 867 Prescription Isodose Line  
 868 The total dose delivered to the prescription isodose line shall be  
 869 calculated and reported.  
 870
- 871 Normal Tissue and Critical Organ Dose Points  
 872 Documentation of the highest point dose to the optic chiasm or a DVH  
 873 of the optic chiasm shall be submitted (see [Section 18.0](#) Records and  
 874 Data Collection Procedures )and Radiation Therapy Quality Control  
 875 Guidelines ([Appendix VII](#)).  
 876
- 877 Isodose Distribution  
 878 A hard copy of the isodose distribution for each target must be  
 879 submitted. Isodose distributions should be displayed on three orthogonal  
 880 planes or, if not possible, on multiple transverse slices through each  
 881 target.
- 882 **8.0 Dosage Modification Based on Adverse Events: None**  
 883
- 884 **9.0 Ancillary Treatment/Supportive Care**  
 885
- 886 9.1 Concomitant Medications  
 887 Patients may be currently receiving hormonal agents, steroids, and/or anticonvulsants.



888 **10.0 Adverse Event (AE) Reporting and Monitoring**

889

890

10.1 Adverse Event Characteristics

891 CTCAE term (AE description) and grade: The descriptions and grading scales found in  
 892 the revised NCI Common Terminology Criteria for Adverse Events (CTCAE) version  
 893 4.0 will be utilized for AE reporting. All appropriate treatment areas should have access  
 894 to a copy of the CTCAE version 4.0. A copy of the CTCAE version 4.0 can be  
 895 downloaded from the CTEP website

896 ([http://ctep.cancer.gov/protocolDevelopment/electronic\\_applications/ctc.htm](http://ctep.cancer.gov/protocolDevelopment/electronic_applications/ctc.htm))

897

898

899

10.11 Adverse Event Monitoring

900 Adverse event monitoring and reporting is a routine part of every clinical trial.  
 901 First, identify and grade the severity of the event using the CTCAE v 4.0. Next,  
 902 determine whether the event is expected or unexpected (see [Section 10.2](#)) and if  
 903 the adverse event is related to the medical treatment or procedure (see [Section](#)  
 904 [10.3](#)). With this information, determine whether an adverse event should be  
 905 reported as an expedited report (see [Section 10.4](#)). Important: Expedited adverse  
 906 event reporting requires submission of a CTEP Adverse Event Reporting System  
 907 (CTEP-AERS) report(s). Expedited reports are to be completed within the  
 908 timeframes and via the mechanisms specified in [Section 10.4](#) and [10.5](#). All AEs  
 909 reported via expedited mechanisms must also be reported via the routine data  
 910 reporting mechanisms defined by the protocol (see [Sections 10.4](#) and [18.0](#)).  
 911

912

10.12 CTCAE and Grade

913 Each CTCAE term in the current version is a unique representation of a specific  
 914 event used for medical documentation and scientific analysis and is a single  
 915 MedDRA Lowest Level Term (LLT). Grade is an essential element of the  
 916 Guidelines and, in general, relates to severity for the purposes of regulatory  
 917 reporting to NCI.

918 **Note:** A severe AE, as defined by the above grading scale, is NOT the same as  
 919 serious AE which is defined in the table in [Section 10.4](#).  
 920

921

10.2 Expected vs. Unexpected

922

- 923 • The determination of whether an AE is expected is based the information  
 924 provided in [Section 15.0](#) of this protocol.
- 925 • Unexpected AEs are those not listed in the information provided in [Section 15.0](#)  
 926 of this protocol.

927

928

929

**Note:** “Unexpected adverse experiences” means any adverse experience that is  
 930 neither identified in nature, severity, or frequency of risk in the information  
 931 provided for IRB review nor mentioned in the consent form.

932

10.3 Assessment of Attribution

933

934 When assessing whether an adverse event is related to a medical treatment or procedure,  
 935 the following attribution categories are utilized:

936

937

Definite - The adverse event *is clearly related* to the agent(s).

938

Probable - The adverse event *is likely related* to the agent(s).

- 939 Possible - The adverse event *may be related* to the agent(s).
- 940 Unlikely - The adverse event *is doubtfully related* to the agent(s).
- 941 Unrelated - The adverse event *is clearly NOT related* to the agent(s).

942  
943 **Events determined to be possibly, probably or definitely attributed to a**  
944 **medical treatment suggest there is evidence to indicate a causal relationship**  
945 **between the drug and the adverse event.**

946  
947 10.31 Special Situations for Expedited Reporting

948  
949 10.311 An expedited report is not required for a specific protocol where an AE  
950 is listed as expected. These events must still be reported via routine  
951 reporting as specified in [Section 10.5](#). The protocol-specific guidelines  
952 supersede the NCI Adverse Event Reporting Guidelines (See [Section](#)  
953 [10.4](#)) for AE reporting.

954  
955 10.312 Persistent or Significant Disabilities/Incapacities  
956 Any AE that results in persistent or significant incapacity or substantial  
957 disruption of the ability to conduct normal life functions (formerly  
958 referred to as disabilities), congenital anomalies or birth defects, must  
959 be reported immediately if they occur at any time following treatment  
960 with an agent under an IND/IDE since they are considered to be a  
961 serious AE and must be reported to the sponsor as specified in 21 CFR  
962 312.64(b).

963  
964 10.313 Death  
965 Any death occurring within 30 days of the last dose, regardless of  
966 attribution to an agent/intervention under an IND/IDE requires  
967 expedited reporting within 24 hours.

968  
969 Any death occurring greater than 30 days with an attribution of  
970 possible, probable, or definite to an agent/intervention under an  
971 IND/IDE requires expedited reporting within 24-hours.

972  
973 **Reportable Categories of Death**

- 974 • Death attributable to a CTCAE term.
- 975
- 976 • Death Neonatal: A disorder characterized by cessation of life  
977 during the first 28 days of life.
- 978
- 979 • Death NOS: A cessation of life that cannot be attributed to a  
980 CTCAE term associated with Grade 5
- 981
- 982 • Sudden death NOS: An unexpected cessation of life that cannot  
983 be attributed to a CTCAE term associated with Grade 5.
- 984
- 985 • Death due to progressive disease should be reported as  
986 Grade 5 “Neoplasms benign, malignant and unspecified  
987 (including cysts and polyps) – Other (Progressive Disease)”  
988

989 under the system organ class (SOC) of the same name.  
 990 Evidence that the death was a manifestation of underlying  
 991 disease (i.e., radiological changes suggesting tumor growth  
 992 or progression: clinical deterioration associated with a  
 993 disease process) should be submitted.  
 994

995 10.314 Secondary Malignancy  
 996

- 997 • A **secondary malignancy** is a cancer caused by treatment for a  
 998 previous malignancy (i.e., treatment with investigational  
 999 agent/intervention, radiation or chemotherapy). A secondary  
 1000 malignancy is not considered a metastasis of the initial  
 1001 neoplasm.  
 1002
- 1003 • CTEP requires all secondary malignancies that occur following  
 1004 treatment with an agent under an IND/IDE be reported via  
 1005 CTEP-AERS. Three options are available to describe the  
 1006 event:  
 1007
  - 1008 ○ Leukemia secondary to oncology chemotherapy (i.e.,  
 1009 Acute Myelocytic Leukemia [AML])
  - 1010 ○ Myelodysplastic syndrome (MDS)
  - 1011 ○ Treatment-related secondary malignancy
- 1012 • Any malignancy possibly related to cancer treatment (including  
 1013 AML/MDS) should also be reported via the routine reporting  
 1014 mechanisms outlined in each protocol.  
 1015

1016 10.315 Second Malignancy  
 1017

1018 A second malignancy is one unrelated to the treatment of a  
 1019 prior malignancy (and is NOT a metastasis from the initial  
 1020 malignancy). Second malignancies require ONLY routine  
 1021 reporting via CDUS  
 1022  
 1023

1024  
1025  
1026  
1027  
1028

10.4 Expedited Reporting Requirements: Studies using Commercial Agent(s) ONLY:  
**Late Phase 2 and Phase 3 Studies: Expedited Reporting Requirements for Adverse Events that Occur on Studies under an IND/IDE within 30 Days of the Last Administration of the Investigational Agent/Intervention<sup>1, 2</sup>**

| <p><b>FDA REPORTING REQUIREMENTS FOR SERIOUS ADVERSE EVENTS (21 CFR Part 312)</b><br/> <b>Note:</b> Investigators <b>MUST</b> immediately report to the sponsor (NCI) <b>ANY</b> Serious Adverse Events, whether or not they are considered related to the investigational agent(s)/intervention (21 CFR 312.64). An adverse event is considered serious if it results in <b>ANY</b> of the following outcomes:</p> <ol style="list-style-type: none"> <li>1) Death</li> <li>2) A life-threatening adverse event</li> <li>3) An adverse event that results in inpatient hospitalization or prolongation of existing hospitalization for <math>\geq 24</math> hours</li> <li>4) A persistent or significant incapacity or substantial disruption of the ability to conduct normal life functions</li> <li>5) A congenital anomaly/birth defect.</li> <li>6) Important Medical Events (IME) that may not result in death, be life threatening, or require hospitalization may be considered serious when, based upon medical judgment, they may jeopardize the patient or subject and may require medical or surgical intervention to prevent one of the outcomes listed in this definition. (FDA, 21 CFR 312.32; ICH E2A and ICH E6).</li> </ol> |                    |                    |                    |                         |
|-------------------------------------------------------------------------------------------------------------------------------------------------------------------------------------------------------------------------------------------------------------------------------------------------------------------------------------------------------------------------------------------------------------------------------------------------------------------------------------------------------------------------------------------------------------------------------------------------------------------------------------------------------------------------------------------------------------------------------------------------------------------------------------------------------------------------------------------------------------------------------------------------------------------------------------------------------------------------------------------------------------------------------------------------------------------------------------------------------------------------------------------------------------------------------------------------------------------------------------------------|--------------------|--------------------|--------------------|-------------------------|
| <p><b>ALL SERIOUS</b> adverse events that meet the above criteria <b>MUST</b> be immediately reported to the NCI via CTEP-AERS within the timeframes detailed in the table below.</p>                                                                                                                                                                                                                                                                                                                                                                                                                                                                                                                                                                                                                                                                                                                                                                                                                                                                                                                                                                                                                                                           |                    |                    |                    |                         |
| Hospitalization                                                                                                                                                                                                                                                                                                                                                                                                                                                                                                                                                                                                                                                                                                                                                                                                                                                                                                                                                                                                                                                                                                                                                                                                                                 | Grade 1 Timeframes | Grade 2 Timeframes | Grade 3 Timeframes | Grade 4 & 5 Timeframes  |
| Resulting in Hospitalization $\geq 24$ hrs                                                                                                                                                                                                                                                                                                                                                                                                                                                                                                                                                                                                                                                                                                                                                                                                                                                                                                                                                                                                                                                                                                                                                                                                      | 10 Calendar Days   |                    |                    | 24-Hour 5 Calendar Days |
| Not resulting in Hospitalization $\geq 24$ hrs                                                                                                                                                                                                                                                                                                                                                                                                                                                                                                                                                                                                                                                                                                                                                                                                                                                                                                                                                                                                                                                                                                                                                                                                  | Not required       | 10 Calendar Days   |                    |                         |
| <p><b>Expedited AE reporting timelines are defined as:</b></p> <ul style="list-style-type: none"> <li>○ “24-Hour; 5 Calendar Days” - The AE must initially be reported via CTEP-AERS within 24 hours of learning of the AE, followed by a complete expedited report within 5 calendar days of the initial 24-hour report.</li> <li>○ “10 Calendar Days” - A complete expedited report on the AE must be submitted within 10 calendar days of learning of the AE.</li> </ul>                                                                                                                                                                                                                                                                                                                                                                                                                                                                                                                                                                                                                                                                                                                                                                     |                    |                    |                    |                         |
| <p><sup>1</sup>Serious adverse events that occur more than 30 days after the last administration of investigational agent/intervention and have an attribution of possible, probable, or definite require reporting as follows:<br/> <b>Expedited 24-hour notification followed by complete report within 5 calendar days for All Grade 4, and Grade 5 AEs</b><br/> <b>Expedited 10 calendar day reports for Grade 2 adverse events resulting in hospitalization or prolongation of hospitalization, Grade 3 adverse events</b></p> <p><sup>2</sup> For studies using PET or SPECT IND agents, the AE reporting period is limited to 10 radioactive half-lives, rounded UP to the nearest whole day, after the agent/intervention was last administered. Footnote “1” above applies after this reporting period.<br/>                 Effective Date: May 5, 2011</p>                                                                                                                                                                                                                                                                                                                                                                           |                    |                    |                    |                         |

1029  
1030

**Refer to 10.41 for NCI Contact Information or Technical Help regarding CTEP-AERS reporting.**

1031  
1032  
1033  
1034  
1035

**In the rare event when internet connectivity is disrupted, a 24 hour notification must be made to NCI by telephone. An electronic report must be submitted immediately upon establishment of internet re-connection.**

10.41 Contact Information for NCI Safety Reporting

|                                                                           |                                                                                                                                                                                           |
|---------------------------------------------------------------------------|-------------------------------------------------------------------------------------------------------------------------------------------------------------------------------------------|
| Website for submitting expedited reports                                  | <a href="https://eapps-ctep.nci.nih.gov/ctepaers/">https://eapps-ctep.nci.nih.gov/ctepaers/</a>                                                                                           |
| AEMD Help Phone (for CTEP)*                                               | 301-897-7497 Monday through Friday, 7:00 AM to 7:00 PM (US Eastern Time)                                                                                                                  |
| CIP Help Phone for SAE reporting*                                         | 301-897-1704 Monday through Friday, 7:00 AM to 7:00 PM (US Eastern Time)                                                                                                                  |
| Fax for expedited report supporting Medical Documentation for CTEP trials | 301-230-0159 (back-up FAX: 301-897-7404)                                                                                                                                                  |
| Fax for expedited report supporting Medical Documentation for CIP trials  | 301-897-7402                                                                                                                                                                              |
| AEMD Help Email:                                                          | <a href="mailto:aemd@tech-res.com">aemd@tech-res.com</a>                                                                                                                                  |
| CIP SAE Reporting Email                                                   | <a href="mailto:CIPSAEReporting@tech-res.com">CIPSAEReporting@tech-res.com</a>                                                                                                            |
| Technical (e.g., IT or computer issues ONLY) Help Phone*                  | 1-888-283-7457                                                                                                                                                                            |
| CTEP-AERS Technical Help Email                                            | <a href="mailto:ncictephhelp@ctep.nci.nih.gov">ncictephhelp@ctep.nci.nih.gov</a> .                                                                                                        |
| CTCAE v4 Help/Questions Email                                             | <a href="mailto:ncictcaehelp@mail.nih.gov">ncictcaehelp@mail.nih.gov</a>                                                                                                                  |
| CTEP-AERS FAQs link                                                       | <a href="https://eapps-ctep.nci.nih.gov/ctepaers/help/webhelp/CTEP-AERS%20FAQ.htm">https://eapps-ctep.nci.nih.gov/ctepaers/help/webhelp/CTEP-AERS%20FAQ.htm</a>                           |
| CTEP-AERS Computer Based Training link                                    | <a href="http://ctep.cancer.gov/protocolDevelopment/electronic_applications/adverse_events.htm">http://ctep.cancer.gov/protocolDevelopment/electronic_applications/adverse_events.htm</a> |

1036  
1037  
1038  
1039  
1040  
1041  
1042

\*Office phone and fax are accessible 24 hrs per day 7 days a week (The AEMD phone line is staffed from Monday through Friday, 7:00 AM to 7:00 PM ET. Any phone call after these hours will go to voicemail. Please leave contact information and the phone call will be returned the following business day.

10.5 Other Required Expedited Reporting

| EVENT TYPE                                                                                                          | REPORTING PROCEDURE                                                                                                                                                                                                                                                                                                                                                                         |
|---------------------------------------------------------------------------------------------------------------------|---------------------------------------------------------------------------------------------------------------------------------------------------------------------------------------------------------------------------------------------------------------------------------------------------------------------------------------------------------------------------------------------|
| Other Grade 4 or 5 Events and/or Any Hospitalizations During Treatment Not Otherwise Warranting an Expedited Report | <b>NCCTG Institutions Only:</b> Complete a Notification Form: Grade 4 or 5 Non-AER Reportable Events/Hospitalization Form electronically via the NCCTG Remote Data Entry System within 5 working days of the date the clinical research associate (CRA) is aware of the event(s) necessitating the form. If a CTEP-AERS report has been submitted, this form does not need to be submitted. |

1043  
1044  
1045  
1046  
1047

10.51 Adverse Events and Symptoms/Conditions to be Graded at Baseline  
Adverse Events to be graded at each evaluation and pretreatment symptoms/conditions to be evaluated at baseline per CTCAE v4.0 grading unless otherwise stated in the table below:

1048

| System Organ Class (SOC)                       | Adverse event                   | Baseline | Each evaluation |
|------------------------------------------------|---------------------------------|----------|-----------------|
| Ear and labyrinth disorders                    | Hearing impaired                | X        | X               |
|                                                | External ear inflammation       | X        | X               |
| Eye disorders                                  | Retinopathy                     | X        | X               |
| Gastrointestinal disorders                     | Nausea                          | X        | X               |
|                                                | Vomiting                        | X        | X               |
| Injury, poisoning and procedural complications | Dermatitis radiation            | X        | X               |
|                                                | Wound dehiscence                | X        | X               |
| Nervous system disorders                       | Cognitive disturbance           | X        | X               |
|                                                | Peripheral motor neuropathy     | X        | X               |
|                                                | Central nervous system necrosis | X        | X               |
| Skin and subcutaneous tissue disorders         | Alopecia                        | X        | X               |

1049

1050

1051

1052

1053

1054

10.52 Adverse Event Submission Using Case report Forms (CRFs)  
Submit via appropriate North Central Cancer Treatment Group (NCCTG) Case Report Forms (i.e., paper or electronic, as applicable) the following AEs experienced by a patient and not specified in [Section 10.4](#):

1055

10.521 Grade 2 AEs deemed *possibly, probably, or definitely* related to the study treatment or procedure.

1056

1057

1058

10.522 Grade 3 and 4 AEs regardless of attribution to the study treatment or procedure.

1059

1060

1061

10.523 Grade 5 AEs (Deaths)

1062

1063

1064

1065

1066

1067

1068

1069

1070

1071

1072

1073

1074

1075

1076

10.53 Submission of Late Occurring Adverse Events  
Refer to the instructions in the Forms Packet (or electronic data entry screens, as applicable) regarding the submission of late occurring AEs following completion of the Active Monitoring Phase (i.e., compliance with Test Schedule in [Section 4.0](#)).

1077 **11.0 Treatment Evaluation**

1078  
1079  
1080  
1081  
1082  
1083  
1084  
1085  
1086  
1087  
1088  
1089  
1090  
1091  
1092  
1093  
1094  
1095  
1096  
1097  
1098  
1099  
1100  
1101  
1102  
1103  
1104  
1105  
1106  
1107  
1108  
1109  
1110  
1111  
1112  
1113  
1114  
1115  
1116  
1117  
1118  
1119  
1120  
1121  
1122  
1123  
1124  
1125  
1126

## 11.1 Response criteria

The neurologic examination and the MRI and/or CT at each evaluation will be scored as follows:

## 11.11 Unresected Brain Metastases

The response score will be rated as one of the following (follow-up MRI or CT brain scans will be compared to the prior MRI or CT brain scan):

**Complete response:** Radiographic disappearance of brain metastasis (es)

**Partial response:** Greater than 50% reduction in the size of each lesion radiographically, using perpendicular diameters

**Stable disease:** 0 to 50% reduction in the size of each lesion radiographically, using perpendicular diameters

**Disease progression:** Increase of > 25% in the size of any lesion or a new, non-contiguous lesion developed outside the radiosurgical bed (in the brain or meninges).

**Note:** Tumor progression of the treated SRS lesions will be evaluated independently of the development of new lesions. Radionecrosis will not be considered tumor progression.

## 11.12 Resected Brain Metastasis (i.e. surgical cavity)

**Note:** Tumor bed control is defined as the absence of new nodular contrast enhancement in the surgical bed. By definition a post-operative MRI or CT brain scan is required as a baseline study. If there is *questionable* development of nodular enhancement in the surgical bed than this should be graded as stable disease recognizing follow-up studies will make this determination more certain (e.g. questionable area of nodular enhancement continues to grow and should therefore be coded as disease progression).

The response score will be rated as one of the following (follow-up MRI or CT brain scans will be compared to the prior MRI or CT brain scan):

**Stable disease:** Absence of new nodular contrast enhancement in the surgical bed.

**Disease progression:** Development of new nodular contrast enhancement in the surgical bed.

**Note:** Tumor progression of the treated cavity bed will be evaluated independently of the development of new lesions. Radionecrosis will not be considered tumor progression.

- 1127 11.2 Magnetic Resonance Imaging (MRI) Guidelines  
 1128 The diagnostic MRI brain scan will fall into one of four categories (see [Section 4.0](#)): pre-  
 1129 registration (pre-operative and post-operative), randomization (prior to randomization),  
 1130 planning if SRS is performed (typically after randomization, prior to treatment) and  
 1131 follow-up (observation). The pre-registration MRI brain scans will be used to determine  
 1132 preliminary patient eligibility. The pre-registration and pre-randomization MRI brain  
 1133 scans are without parameters since they are performed prior to study entry. The pre-  
 1134 randomization MRI brain scan will be used to determine final eligibility. If SRS is  
 1135 performed there will typically be a planning scan  
 1136  
 1137 The minimum parameters for the planning MRI brain scan and the follow-up MRI brain  
 1138 scans are:  
 1139
  - Axial post-contrast images
  - 5mm or less slice thickness
  - Scanner should be at least a 1.0 Tesla magnet  
 1140  
 1141 **Note:** It is recommended the same technique be used for each of the diagnostic MRI  
 1142 brain scans at follow-up.  
 1143  
 1144 **Note:** The (pre-registration) post-operative MRI scan may be used for the  
 1145 randomization (prior to randomization) scan if the scan was obtained  $\leq 28$  days  
 1146 prior to randomization.  
 1147  
 1148  
 1149  
 1150 11.3 Patient Monitoring during Active Treatment  
 1151 Patients will be monitored for clinical evidence of progression of neurological symptoms  
 1152 and treatment failure. Patients will be assessed with a physical and neurological  
 1153 examination and contrasted MRI or CT brain scan at baseline (after pre-registration, but  
 1154 prior to randomization) and post-treatment at week 12 post randomization and at months  
 1155 6, 9, 12, 16 and 24. Follow-up visits are required +/- 14 days for week 12, +/- 1 month for  
 1156 months 6, 9, 12, +/- 2 months for month 16 and +/- 4 month for month 24. At each  
 1157 scheduled study visit, a QOL booklet (FACT-BR, Fatigue Uniscale, and LASA),  
 1158 functional independence (Barthel ADL Index and ECOG performance status), and  
 1159 neurocognitive evaluations will be completed.  
 1160  
 1161 11.4 Patient Monitoring during Observation  
 1162 Patients will be in observation phase and assessed for local recurrence, progression in the  
 1163 surgical bed, distant brain recurrence and progression until death or 24 months from  
 1164 study entry. Patients will continue to be monitored after progression and should continue  
 1165 to be followed using the test schedule for observation ([Section 4.0](#)).  
 1166  
 1167 11.5 Response Rate  
 1168  
 1169 11.51 MRI or CT scans  
 1170 The follow-up MRI or CT brain scans will be compared to the prior MRI or CT  
 1171 brain scan and will be used to score a response rate for each lesion/surgical bed  
 1172 and to detect distant brain recurrence. Every effort will be made to distinguish  
 1173 between disease progression and radionecrosis including, as indicated, MRI (e.g.  
 1174 DCE, MRS), CT, SPECT (single photon emission computed tomography), PET  
 1175 (positron emission tomography), or surgical resection.



1176 Central Review: In addition to the review and response evaluation of the MRI or  
 1177 CT scans by the local investigators there will also be a parallel central review of  
 1178 all MRI and CT scans by Drs. Brown and Parney. This central review will be  
 1179 *only* for the surgical cavity and will not be for distant brain failure or other  
 1180 aspects of the scans. Drs. Brown and Parney will perform readings at different  
 1181 sessions to ensure that the interpretations will remain independent. If readings are  
 1182 discordant, a third PI (Dr. Laack) will adjudicate and determine the surgical bed  
 1183 control for the dataset. The readers will be blinded to the treatment arm and will  
 1184 interpret the data from all time points available. These reviews will be ongoing  
 1185 and performed either at the semi-annual group meetings or at Headquarters.  
 1186

1187 11.511 As part of the central review there will also be a determination of gross  
 1188 total resection by central review. This will follow the same procedures as  
 1189 outlined above in 11.51. The pre-operative and post-operative, pre-  
 1190 randomization brain scans will be utilized to make these determinations.  
 1191

1192 11.6 Time to CNS Failure

1193 Time to CNS failure will be measured from the date the patient is randomized on this  
 1194 study to the date of diagnosis of disease progression.  
 1195

1196 11.7 Survival

1197 Survival time will be measured from the date the patient is randomized on this study to  
 1198 death, due to any cause. Death will be scored either as due to neurological cause (any  
 1199 CNS event such as an intracranial mass, hemorrhage, or hydrocephalus) or non-  
 1200 neurological cause. Autopsy reports should be obtained, whenever possible, and sent by  
 1201 fax to the NCCTG Operations Office at (507) 266-7240.  
 1202

1203 11.8 Response Review

1204 Radiologic Images: All radiologic images must be free of marks that might obscure the  
 1205 lesions or bias the evaluation of the reviewer(s). **All MRI or CT brain scans are to be**  
 1206 **submitted ≤ 1 week of completion (Note: this applies to ALL participating sites).** This  
 1207 includes pre-registration (both pre- and post-operative), randomization, planning scans,  
 1208 and follow-up. These scans will be essential for central review of brain control.  
 1209

1210 Images on CDs are preferred to film but must be DICOM compatible. Send all images to  
 1211 NCCTG Operations Office, Attn: QAS for N107C, NW Clinic 3-24 CC, 200 First Street  
 1212 SW, Rochester, MN 55905  
 1213

1214 **Note:** Reimbursement will not be given for any cost incurred for submitting these  
 1215 materials.  
 1216

1217 **12.0 Descriptive Factors**

1218 None

- 1219 **13.0 Treatment/Follow-up Decision at Evaluation of Patient**  
 1220  
 1221 13.1 Treatment of Recurrence  
 1222 Directions for the treatment of recurrence are important in order to assure the  
 1223 comparability of patient outcomes between treatment arms. Clinical judgment in the  
 1224 management of palliative patients is paramount. At the discretion of the treating  
 1225 physician, the study chair should be contacted for guidance.  
 1226  
 1227 13.2 Retreatment Guidelines  
 1228  
 1229 13.21 One to Five New Lesions  
 1230 Patients who develop recurrence to the brain following study treatment should be  
 1231 retreated with SRS alone **if one to five NEW lesions are present in the absence**  
 1232 **of rapidly progressive systemic disease** (please note it is ***NOT*** recommended  
 1233 that a brain metastases previously treated with SRS be retreated with SRS).  
 1234 WBRT should be withheld unless more than three lesions recur in a rapid fashion  
 1235 or the patient refuses SRS.  
 1236  
 1237 13.22 More than Five Metastases  
 1238 WBRT alone should be given, reserving SRS for salvage. WBRT should be  
 1239 considered (especially in those patients not previously treated with WBRT) in  
 1240 patients with progressive metastases that have received SRS to these (specific)  
 1241 lesions. If more than five new metastases, repeat WBRT should be considered, as  
 1242 outlined below, if there has been an extended period of time since the first course  
 1243 of WBRT, generally 6 months or more.  
 1244  
 1245 The salvage WBRT dose guidelines are as follows:  
 1246 Arm A: Repeat WBRT 25 Gy in 10 fractions.  
 1247 Arm B: Initial WBRT of 30 Gy in 10 fractions.  
 1248  
 1249 If needed repeat WBRT of 25 Gy in 10 fractions.  
 1250  
 1251 13.23 Treatment other than SRS and WBRT  
 1252 An abbreviated course of treatment for the patient may be more appropriate,  
 1253 depending on systemic disease progression. Palliative surgery is recommended  
 1254 for patients with a symptomatic lesion not responsive to high-dose steroids when  
 1255 there is no evidence of rapidly progressive systemic disease. Chemotherapy is  
 1256 administered at the discretion of the treating physician.  
 1257  
 1258 13.24 Patient and Physician Discussion of Additional Treatment  
 1259 All patients should be instructed to communicate with their study doctor (i.e.  
 1260 treating physician) prior to accepting any additional therapy.  
 1261  
 1262 13.3 Treatment / Follow up Decision  
 1263  
 1264 13.31 Treatment after Progression  
 1265 Patients who have progressed will continue with evaluation as outlined under  
 1266 observation in [Section 4.0](#). An Evaluation/Observation Form must be completed  
 1267 to report progression in the brain or progression of systemic disease (see [Section](#)  
 1268 [18.0](#)). However, it is recommended to treat patients per [Section 13.2](#).

- 1269 13.32 Treatment Not Completed
- 1270 If a patient does not complete treatment, they will go to observation.
- 1271
- 1272 13.33 Patient Withdrawal
- 1273 Patients who refuse continued observation (i.e., withdraw from the study) will go
- 1274 to event-monitoring.
- 1275
- 1276 13.34 Patient Refusal of Treatment
- 1277 If a patient refuses a treatment assignment (and is classified as a cancel), it is
- 1278 necessary to provide follow-up information. On-study material and the End of
- 1279 Active Treatment/Cancel Notification Form, including the Radiation Therapy
- 1280 Reporting Form (site must write the reason the radiation was not given on the
- 1281 blank space of the form prior to submitting) must be submitted. The patient will
- 1282 go to Event Monitoring.
- 1283
- 1284 13.35 Definition of Cancel
- 1285 A patient is deemed a cancel if he/she is removed from the study for any reason
- 1286 before any study treatment is given. On-study material and the End of Active
- 1287 Treatment/Cancel Notification Form, including the Radiation Therapy Reporting
- 1288 Form (site must write the reason the radiation was not given on the blank space of
- 1289 the form prior to submitting) must be submitted.
- 1290

1291 **14.0 Body Fluid Biospecimens**

1292 14.1 Body Fluid Biospecimen Submission

1293 Table 14.11 Summary of Body Fluid Biospecimens for This Protocol

| Biospecimen to submit                                     | Mandatory or optional | When to submit                                                        | Reason for submission (methodology section)          | Protocol section with specific details for specimen submission |
|-----------------------------------------------------------|-----------------------|-----------------------------------------------------------------------|------------------------------------------------------|----------------------------------------------------------------|
| Blood/blood products (EDTA whole blood)                   | Mandatory             | Multiple draws (see <a href="#">Section 14.24</a> for schedule)       | Correlative studies ( <a href="#">Section 14.4</a> ) | <a href="#">Section 14.2</a>                                   |
| Blood/blood products (serum from no additive whole blood) | Mandatory             | Multiple draws (see <a href="#">Section 14.24</a> for schedule)       | Correlative studies ( <a href="#">Section 14.4</a> ) | <a href="#">Section 14.2</a>                                   |
| Urine                                                     | Mandatory             | Multiple collections (see <a href="#">Section 14.34</a> for schedule) | Correlative studies ( <a href="#">Section 14.4</a> ) | <a href="#">Section 14.3</a>                                   |

1296 14.2 Blood/Blood Products Handling

1297 14.21 Blood Collection, Processing and Shipping Kits

1298 **Kits are required for this study.**

1299

1300

- 14.211 The kit contains supplies and instructions for collecting, processing, and shipping serum, whole blood, and urine (see [Section 14.3](#)) specimens.
  - 14.212 Participating institutions may obtain kits by completing and faxing the Supply Order Form (found in the Forms Packet) to the number listed on the form. Fill out the site address to where the kits will be shipped on the Fax Supply form. Because we are now being charged for all outgoing kits, a small, but sufficient, supply of the specimen collection kits should be ordered prior to patient entry. Do not send the unused kits back to Biospecimen Accessioning and Processing (BAP) Receiving or the BAP Shared Resource.
  - 14.213 Kits will be sent via FedEx® Ground at no additional cost to the participating institutions. Allow up to two weeks to receive the kits. Kits may arrive inside the shipping boxes or as second shipment box.
  - 14.214 Kits will not be sent via rush delivery service unless the participating institution provides their own FedEx® account number or alternate billing number for express service. NCCTG will not cover the cost for rush delivery of kits.
- 14.22 **Sample Collections During Weekdays Only**  
All samples must be collected Monday-Thursday ONLY.
- 14.23 **Labeling of Tubes**  
Label specimen tube(s) with protocol number, patient study ID number, and time and date blood is drawn.
- 14.24 **Collection and Processing**  
Collect and process all blood/blood products according to specific kit instructions and table below.

1  
2  
3  
4

Table 14.241 Summary of Research Blood/Blood Products to Be Collected for This Protocol

| Mandatory or optional | Collection tube and additive (Color of tube top) | Volume to collect per tube (Number of tubes collected) | Blood product | Baseline <sup>1</sup> | 12 weeks <sup>2</sup> | 6 months <sup>2</sup> | 12 months <sup>2</sup> | Process at site? | Storage/shipping conditions <sup>3</sup> |
|-----------------------|--------------------------------------------------|--------------------------------------------------------|---------------|-----------------------|-----------------------|-----------------------|------------------------|------------------|------------------------------------------|
| Mandatory             | None (red)                                       | 10 mL (2)                                              | Serum         | X                     | X                     | X                     | X                      | Yes              | Freeze/dry ice                           |
| Mandatory             | EDTA (purple)                                    | 10 mL (1)                                              | Whole Blood   | X                     | X                     | X                     | X                      | No               | Refrigerate or cold pack DO NOT FREEZE   |

5  
6  
7  
8  
9

- 1 After randomization, but prior to treatment;
- 2 After randomization;
- 3 After all samples have been processed according to kit instructions, ship all specimens according to shipping instructions (See [Section 14.25](#) for detailed shipping instructions).

10  
11  
12  
13  
14  
15  
16  
17  
18  
19  
20  
21  
22  
23  
24  
25  
26

14.25 Shipping

- 14.251 Verify ALL sections of the Research Blood Submission Form (see Forms Packet), BAP Requisition Form (provided in kit), and specimen collection labels are completed and filled in correctly. Enter information from the Research Blood Submission Form into the remote data entry system ≤ 7 days after specimen collection (see Forms Packet).
- 14.252 Specimens must be shipped the same day they are drawn.
- 14.253 Specimens will be shipped in a dual-temperature shipping container. Place the refrigerated EDTA tubes with a properly prepared cold pack in one compartment. See kit instructions for specific details for cold pack preparation (i.e., frozen or refrigerated) and proper packing of blood and cold pack to avoid freezing of specimen. Place the frozen serum samples with dry ice in the other compartment of the dual-temperature shipping container.
- 14.254 Ship specimens via Priority Overnight service, Monday – Thursday ONLY, to BAP Receiving according to kit instructions. Do not send samples on weekends or just prior to federal holidays.

- 27 14.255 The BAP kits will include a smart shipper label (3 x 5 white barcoded
- 28 label) affixed to the shipping boxes. The smart shipper label is a pre-
- 29 addressed return label, which replaces the need for an airbill. Shipping
- 30 costs will be covered by NCCTG if the shipping box provided with the
- 31 BAP kit is used for shipping specimens to BAP Receiving
- 32
- 33 14.256 BAP Freezer will receive the samples and immediately forward
- 34 specimens to the NCCTG Research Base BAP Shared Resource,
- 35 Hilton SL-21, Attn: BAP Supervisor.
- 36 14.3 Urine Handling
- 37
- 38 14.31 Kits
- 39 Kits are required for this study. The supplies and instructions for collecting,
- 40 processing, and shipping urine specimens are combined with the blood collection
- 41 kit
- 42
- 43 14.32 Sample Collections During Weekdays Only
- 44 All samples must be collected Monday-Thursday ONLY.
- 45
- 46 14.33 Labeling of Tubes
- 47 Label specimen tube(s) with protocol number, patient ID number, and time and
- 48 date specimen is collected.
- 49
- 50 14.34 Collection and Processing
- 51 Collect and process urine according to specific kit instructions and table below.
- 52
- 53

Table 14.341 Summary of Research Urine to Be Collected for This Protocol

| Mandatory or optional | Collection container description | Volume to collect (Number of containers collected) | Baseline <sup>1</sup> | 12 weeks <sup>2</sup> | 6 months <sup>2</sup> | 12 months <sup>2</sup> | Process at site? | Storage/shipping conditions <sup>3</sup>  |
|-----------------------|----------------------------------|----------------------------------------------------|-----------------------|-----------------------|-----------------------|------------------------|------------------|-------------------------------------------|
| Mandatory             | Urine (no additive)              | 50 mL (1)                                          | X                     | X                     | X                     | X                      | No               | Refrigerate or cold pack<br>DO NOT FREEZE |

Version Date: 11/03/14  
 1 After randomization, but prior to treatment;  
 2 After randomization;  
 3 After all samples have been processed according to kit instructions, ship all specimens according to shipping instructions (see [Section 14.35](#) for detailed shipping instructions).

- 54
- 55
- 56
- 57
- 58
- 59 14.35 Shipping
- 60
- 61 14.351 Verify ALL sections of the Research Urine Submission Form (see
- 62 Forms Packet), BAP Requisition Forms (provided in the blood/urine
- 63 kits), and specimen labels are completed and filled in correctly. Enter
- 64 information from the Research Urine Submission Form into the remote
- 65 data entry system ≤ 7 days after specimen collection (see Forms
- 66 Packet).

- 67 14.352 Urine Shipping
- 68 14.3521 Urine specimens must be shipped the same day they are drawn.
- 69 14.3522 Urine specimens will be shipped in the same dual-temperature
- 70 shipping container as the whole blood and serum. Place the
- 71 urine container with a properly prepared cold pack in the same
- 72 compartment as the EDTA whole blood. See kit instructions
- 73 for specific details for cold pack preparation (i.e., frozen or
- 74 refrigerated) and proper packing of blood and cold pack to
- 75 avoid freezing of specimen.
- 76
- 77 14.353 Ship specimens via Priority Overnight service, **Monday – Thursday**
- 78 **ONLY**, to BAP Receiving according to kit instructions. **Do not send**
- 79 **samples on weekends or just prior to federal holidays.**
- 80
- 81 14.354 The BAP kits will include a smart shipper label (3 x 5 white barcoded
- 82 label) affixed to the shipping boxes. The smart shipper label is a pre-
- 83 addressed return label, which replaces the need for an airbill. Shipping
- 84 costs will be covered by NCCTG if the shipping box provided with the
- 85 BAP kit is used for shipping specimens to BAP Receiving.
- 86
- 87 14.355 BAP Receiving will receive the samples and immediately forward
- 88 specimens to the NCCTG Research Base BAP Shared Resource,
- 89 Stable 13-10A, Attention: BAP Supervisor.
- 90

91 14.4 Correlative Study Methodology and Storage Information

92 A variety of measures will be analyzed in this study (see [Section 1.3](#) for additional  
 93 details) to better define the mechanism of neurocognitive decline as well as which  
 94 patients are most likely to develop neurocognitive decline after brain irradiation. Serum  
 95 (collected in a no additive red top tube) and DNA or buffy coat and plasma (collected in  
 96 an EDTA purple top tube) will be collected during this trial at baseline (after pre-  
 97 registration, but prior to treatment), after treatment at week 12 and at 6 and 12 months  
 98 post randomization. These body fluid biospecimens will be analyzed as described below.  
 99 The assays described below will be performed at the NCCTG Research Base (Mayo  
 100 Clinic campus in Rochester), Dr. Deepak Khuntia will serve as the correlative research  
 101 chair and will be available for any communications.

102  
 103 *Version Date: 11/03/14*

Genetic markers 53  
 DNA will be extracted from baseline blood in the BAP Shared Resource at the  
 NCCTG Research Base. Apo E (i.e., Apo E2, Apo E3, and Apo E4) genes will be  
 analyzed for single nucleotide polymorphisms (SNPs) either by Taqman or direct  
 sequencing in the Genotyping Shared Resource at the NCCTG Research Base.

108 14.42 Inflammatory Markers

Serum specimens collected at baseline and at each follow-up visit (see [Section 14.4](#)) will be analyzed using commercially-available ELISAs from R&D Systems, Inc. for the following inflammatory biomarkers: interleukin 1 (IL-1), interleukin 6 (IL-6), and tumor necrosis factor alpha (TNF-α). These markers will be assayed at the NCCTG Research Base.

- 115 14.43 Oxidative Stress  
 116 Our approach to measuring oxidative stress will consist of quantifying protein  
 117 carbonyl content spectrophotometrically (Protein Carbonyl Assay Kit, Cayman  
 118 Chemical Company), measuring lipid hydroperoxides (Lipid Hydroperoxide  
 119 Assay Kit, Cayman Chemical Company), and finally, quantitating isoprostane  
 120 levels (8-Isoprostane EIA Kit, Cayman Chemical Company) in patient serum  
 121 collected at baseline (after pre-registration, but prior to treatment), after treatment  
 122 at week 12 and at 6 and 12 months post randomization. These assays will be  
 123 performed at the NCCTG Research Base.  
 124
- 125 14.44 Hormone and Growth Factors  
 126 Serum specimens collected at baseline and at each follow-up visit will be  
 127 analyzed using commercially available ELISAs for the following hormone and  
 128 growth factors: glucocorticoids (e.g., cortisol), gonadal steroids (e.g., estradiol,  
 129 testosterone, progesterone), growth hormone, human chorionic gonadotropin  
 130 (hCG), insulin-like growth factor-1 (IGF-1), and neuronal growth factor (NGF).  
 131 These assays will be performed at the NCCTG Research Base.  
 132
- 133 14.45 Metabolic Studies  
 134 Urine specimens will be collected at the same time points that the blood  
 135 specimens are collected (i.e., at baseline and at each follow-up visit). Urine will  
 136 be stored at  $-70^{\circ}$  C at the BAP facility at Mayo Clinic Rochester for future  
 137 metabolic studies. Specific metabolic studies will be identified at the conclusion  
 138 of the main study, depending on the state of the science at that time. These  
 139 studies will be performed at the NCCTG Research Base.  
 140
- 141 14.46 Future Studies  
 142 A portion of the serum and DNA will initially be analyzed as described above.  
 143 According to patient consent information (see [Sections 6.154-6.155](#)), remaining  
 144 body fluid biospecimens will be stored frozen at  $-70^{\circ}$  C at the BAP facility at  
 145 Mayo Clinic Rochester until specific analyses are identified. As protocols are  
 146 developed, they will be presented for Alliance and IRB review and approval.  
 147 (This collection is part of a general strategy of investigation for the majority of  
 148 NCCTG studies.)  
 149
- 150 14.5 Specimen Registration and Tracking

151  
 152 *Version Date: 11/03/14* USE OF THE ALLIANCE BIOSPECIMEN MANAGEMENT SYSTEM (BioMS) IS  
 153 MANDATORY AND ALL SPECIMENS MUST BE LOGGED AND SHIPPED VIA  
 154 THIS SYSTEM.

155 BioMS is a web-based system for logging and tracking all biospecimens collected on  
 156 Alliance trials. Authorized individuals may access BioMS at the following URL:  
 157 <http://bioms.allianceforclinicaltrialsinoncology.org> using most standard web browsers  
 158 (Safari, Firefox, Internet Explorer). For information on using the BioMS system, please  
 159 refer to the 'Help' links on the BioMS web page to access the on-line user manual, FAQs,  
 160 and training videos. To report technical problems, such as login issues or application  
 161 errors, please contact: 1-855-55-BIOMS or [Bioms@alliancencn.org](mailto:Bioms@alliancencn.org). For assistance in  
 162 using the application or questions or problems related to specific specimen logging, please  
 163 contact: 1-855-55-BIOMS or [Bioms@alliancencn.org](mailto:Bioms@alliancencn.org).



164 After logging collected specimens in BioMS, the system will create a shipping manifest.  
 165 This shipping manifest must be printed and placed in the shipment container with the  
 166 specimens.

167 All submitted specimens must be labeled with the protocol number (N107C), patient ID,  
 168 patient’s initials and date and type of specimen collected (e.g., serum, whole blood).

169 A copy of the Shipment Packing Slip produced by BioMS must be printed and placed in  
 170 the shipment with the specimens.

171 Please be sure to use a method of shipping that is secure and traceable. Extreme heat  
 172 precautions should be taken when necessary.

173  
 174 14.6 Return of Genetic Testing Research Results  
 175 Because the results generated by the genetic testing included in this section are not  
 176 currently anticipated to have clinical relevance to the patient or their family members, the  
 177 genetic results will not be disclosed to the patients or their physicians.

178  
 179 If at any time, genetic results are obtained that may have clinical relevance, IRB review  
 180 and approval will be sought regarding the most appropriate manner of disclosure and  
 181 whether or not validation in a CLIA-certified setting will be required. Sharing of research  
 182 data with individual patients should only occur when data have been validated by  
 183 multiple studies and testing has been done in CLIA-approved laboratories.  
 184

185 **15.0 Radiation Therapy Risks and Nursing Guidelines**

186  
 187 15.1 Whole Brain Radiotherapy (WBRT)

188  
 189 15.11 Risks and Side Effects  
 190 Risks and side effects related to the Whole Brain Radiation Therapy (WBRT)  
 191 include the following:

192  
 193 **Likely**

- 194 • Alopecia, which may be permanent
- 195 • Temporary scalp erythema and drying
- 196 • Fatigue

197  
 198 **Less Likely**

- 199 • Nausea
- 200 • Memory loss, which can occur in the first few months after whole brain  
 201 radiotherapy and may be permanent
- 202 • Cataract formation
- 203 • Xerostomia
- 204 • Taste changes
- 205 • Temporary ear and ear canal redness, plugging or drainage
- 206 • Headaches
- 207 • Increased sleepiness (occurring four to ten weeks after radiation therapy is  
 208 complete and lasting for several days up to two weeks)

209  
 210 **Rare but serious**

- 211 • Decreased brain function such as motor function (coordination/movement)
- 212 • Brain necrosis, which may require surgery to remove

Version Date: 11/03/14

213  
214  
215  
216  
217  
218  
219  
220  
221  
222  
223  
224  
225  
226  
227  
228  
229  
230  
231  
232  
233  
234  
235  
236  
237  
238  
239  
240  
241  
242  
243  
244  
245  
246  
247  
248  
249  
250  
251  
252  
253  
254  
255  
256  
257  
258  
259  
260  
261  
262

- Stroke
- Secondary malignancy, in the brain or nearby organs
- Eye damage with the possibility of permanent blindness

15.12 Nursing Guidelines

- 15.121 Advise patient of probable hair loss, redness and dryness of the scalp.
- 15.122 Instruct patient in corticosteroid use per MD order.  
**Note:** corticosteroid use not required per protocol.
- 15.123 Observe for signs and symptoms of neurology changes. Report any changes to physician immediately.
- 15.124 Advise patient of probable taste changes. Suggest hard candy to minimize dry mouth and taste changes.
- 15.125 Observe patient for possible skin reaction to external ear, inner canal inflammation. Report changes to the physician.
- 15.126 Assess for increased fatigue; instruct patient in energy-saving life-style.
- 15.127 Remind all patients of the need to use adequate contraception throughout the study and for male patients for 3 months beyond study treatment.

15.2 Stereotactic Radiosurgery (SRS)

15.21 Risks and Side Effects

Risks and side effects related to the Stereotactic Radiosurgery (SRS) include the following:

**Likely**

- Temporary pain associated with the head frame placement (if a head frame is used)

**Less Likely**

- Headache
- Localized alopecia which may be permanent
- Nausea
- Vomiting
- Allergic reaction to the local anesthesia (rash, itching, nausea, or difficulty breathing)
- Bleeding and/or infection around the head frame (if a head frame is used)

**Rare but serious**

- Decreased brain function such as motor function (coordination/movement)
- Swelling of the brain in the treated area which may require steroids
- Brain necrosis, which may require surgery to remove
- Stroke

Version Date: 11/03/14

- 263 • A secondary malignancy in the brain or nearby organs
- 264 • Damage to vision tracts with the possibility of permanent blindness

## 265 15.22 Nursing Guidelines

- 267 15.221 Instruct patient regarding possible localized hair loss.
- 268 15.222 Corticosteroid use not required per protocol.
- 269 15.223 Report any neurologic changes to physician.
- 270 15.224 Remind all patients of the need to use adequate contraception
- 271 throughout the study and for male patients for 3 months beyond study
- 272 treatment.
- 273
- 274
- 275
- 276
- 277

## 278 16.0 Statistical Considerations and Methodology

### 279 16.1 Study Overview

280 This study will be a randomized phase III trial for patients with one to four brain  
 281 metastases. Upon registration, patients will be randomly assigned to one of the two arms:  
 282 Arm A – whole brain radiotherapy (WBRT) arm and Arm B – stereotactic radiosurgery  
 283 (SRS) arm. A dynamic allocation procedure will be used to allocate an equal number of  
 284 patients to each arm. This procedure will balance the marginal distributions of the  
 285 stratification factors between arms, and the stratification factors that will be used are:  
 286 extra cranial disease controlled ( $\leq 3$  vs.  $> 3$  months), age ( $< 60$  vs.  $\geq 60$  years), number of  
 287 brain metastases (1 vs.  $\geq 2$ ), resection cavity maximal diameter ( $\leq 3$  vs.  $> 3$  cm) and  
 288 histology (lung vs. radioresistant vs. others, where radioresistant is defined as brain  
 289 metastases from a sarcoma, melanoma, or renal cell carcinoma histology).  
 290

### 291 16.2 Primary Goals

292 The primary goals of the study are to detect whether there is less neurocognitive  
 293 progression post-randomization in patients who receive SRS compared to patients who  
 294 receive WBRT and whether the overall survival with post-surgical SRS is marginally  
 295 superior to WBRT.  
 296

### 297 16.3 Primary Endpoints

#### 300 16.31 Neurocognitive Progression

301 *Version Date: 11/03/14* Neurocognitive progression is defined as a drop ~~of~~ at least one standard deviation  
 302 from baseline in one of the six neurocognitive tests (all tests are standardized  
 303 based on published norms) at post-randomization evaluation. If patient dies prior  
 304 to a post-randomization neurocognitive evaluation, they will be considered as a  
 305 neurocognitive progression at that time point. In addition, if a patient does not  
 306 complete all the neurocognitive tests, they will be considered a progression at the  
 307 time of the first missed neurocognitive evaluation they missed. Details of  
 308 neurocognitive tests are listed in [Section 4.3](#).  
 309

#### 310 16.32 Overall Survival

311 Overall survival defined as the time from randomization to death from any cause.

312 16.4 Accrual Time and Study Duration  
 313 The total number of eligible patients to be accrued is 174 (87 per arm). Based on the  
 314 accrual of the ongoing NCCTG trial N0574, we anticipate the accrual rate for this trial  
 315 will be approximately 48-72 eligible patients per year (4-6 per month). The estimated  
 316 accrual period will be a maximum of 4 years and the total study duration will be a  
 317 maximum of 5 years. A total of 192 patients, including an extra 18 to accommodate  
 318 losses due to cancellations, ineligibility, or major protocol violations, will be entered into  
 319 this trial unless undue toxicity is encountered.

320  
 321 16.5 Sample Size Derivation for the Primary Goal  
 322

323 16.51 The Null Hypothesis I

324 The null hypothesis I in this study is that SRS is equivalent to WBRT in terms of  
 325 the neurocognitive progression free rate at 6 month post-randomization versus  
 326 the alternative that SRS is superior to WBRT. Based on the literature, we assume  
 327 that the proportion of patients with neurocognitive progression at the 6 month  
 328 post-registration evaluation is 0.65 for patients undergoing WBRT (Li, Bentzen et  
 329 al. 2007). In other words, we assume the 6-month neurocognitive progression  
 330 free rate is 35% in the WBRT group. Under a 1:1 randomization, a sample size  
 331 of 174 will give us at least 85% power to detect a 20% difference of 6-month  
 332 neurocognitive progression free rate between the two treatment groups, assuming  
 333 a one-sided type I error rate of 0.05 (EAST5, calculation method for “difference  
 334 of proportions with multiple looks”). Our primary analysis will be based on an  
 335 intention to treat principle where by all randomized patients to the trial will be  
 336 considered evaluable and we will do a time-to event analysis using Kaplan-Meier  
 337 curves and a log-rank test. Patients who die before 6-months or are alive and do  
 338 not complete all the neurocognitive tests will be considered as having a neuro-  
 339 cognitive progression at the time of death or at the time they missed their first  
 340 neuro-cognitive evaluation (and there were no subsequent neuro-cognitive  
 341 evaluations). The time-to-event analysis will have more power than determined  
 342 using the proportion of patients who are neurocognitive progression-free at 6  
 343 months. As a secondary sensitivity analysis, we will analyze the 6-month  
 344 neurocognitive progression free rate endpoint rather than using a time-to-event  
 345 analysis as will be done for the primary analysis. We will also do a time to event  
 346 analysis where patients are censored for neuro-cognitive progression at the time  
 347 of death (if they have not progressed prior to death) and are censored at the time  
 348 of their last neuro-cognitive evaluation (if they had not progressed prior to that).

349  
 350 *Version Date: 11/03/12* The Null Hypothesis II

53

351 The null hypothesis II in this study is that SRS is inferior to WBRT in terms of  
 352 overall survival versus the alternative hypothesis that SRS is marginally superior  
 353 to WBRT. The estimated median OS in patients with adjuvant WBRT is 9  
 354 months and the median OS for patients with post-surgical SRS is approximately  
 355 11 months (Patchell *et al.*, 1998; Aoyama *et al.*, 2006; Kocher *et al.*, 2009).  
 356 Thus, there is some preliminary evidence that SRS would result in a marginal  
 357 improvement in OS, with approximately a 20% reduction in hazard over WBRT.  
 358 Using the design proposed by Freidlin *et al* (2007) and using EAST version 5.0  
 359 for the calculations, a sample size of 174 patients will give us at least 90% power  
 360 at a 0.05 one-sided significance level for targeting a hazard ratio of 1.3 (in favor  
 361 of WBRT) versus 0.8 (in favor of SRS), assuming a 2.8 years accrual and a  
 362 minimum of 10 months follow-up. In other words, the trial will have 0.95

probability of rejecting the alternative hypothesis of marginal superiority of SRS with respect to OS if the true hazard ratio is 1.3 (in favor of WBRT), and 0.90 probability of concluding the marginal superiority of SRS if the true hazard ratio is 0.8 (in favor of SRS). This is equivalent of concluding that SRS is inferior to WBRT if the median OS in SRS is 7 months compared to 9 months in WBRT, and marginal superiority of SRS over WBRT if the median OS is 11.25 months versus 9 months. The total expected event of death is 134.

#### 16.6 Analysis Plan for the Primary Goal

Efficacy analysis will be based on the intention-to-treat principle with all eligible patients belonging to the treatment arm to which they were randomized. The Cox proportional hazards model will be used to assess whether the distributions of overall survival times differ with respect to treatment regimen having adjusted for all stratification factors. The corresponding p-value associated with the treatment covariate will be compared to the nominal p-value to make the conclusion regarding the primary goal.

The distribution of overall survival for Arm A and B will be estimated using the Kaplan-Meier method. The hazard ratios and median survivals will be estimated with their 95% confidence intervals. The final analysis will take place once 134 total events (deaths from any cause) have been observed in the trial, and the last patient has been followed for at least 6 months post-radiation, whichever comes later. Hypotheses I and II will be considered jointly in making the conclusion for this study:

For Null Hypothesis I, the distribution of neurocognitive progress-free survival for Arm A and B will be estimated using the Kaplan-Meier method. The curves will be compared with a log rank test. The hazard ratios and median survivals will be estimated with their 95% confidence intervals. If the Null Hypothesis I is rejected indicating superiority of SRS in the neurocognitive progression free and the Null Hypothesis II is rejected indicating marginal superiority of SRS in OS, this study would establish post-operative SRS as the standard of care.

If the Null Hypothesis I is rejected indicating superiority of SRS in the neurocognitive progression free survival and the Null Hypothesis II is not rejected indicating SRS is inferior to WBRT in terms of OS, then SRS may still have clinical use due to its clear advantage in neurocognitive progression free survival. This study will provide level I evidence to assist in making therapeutic decisions.

If the Null Hypothesis I is not rejected indicating no identified difference between SRS and WBRT in the neurocognitive progression free survival and the Null Hypothesis II is not rejected indicating SRS is inferior to WBRT in terms of OS, then this study would re-establish adjuvant WBRT as the standard of care.

*Version Date: 11/03/14*

#### 16.7 Interim Analysis for the Primary Goal

Interim analyses for hypothesis I will be performed at the time when 50% of the evaluable patients have been followed for 6 months, and 50% events have been observed for hypothesis II. Since we are testing two hypotheses simultaneously, each of the two co-primary endpoints will be tested independently at the interim analysis, and for each co-primary endpoint, early rejection of the null hypothesis will be considered.

- 412 16.71 Neurocognitive Progression Free Survival  
 413 We use the conservative Lan-DeMets spending function (corresponding to the  
 414 O'Brien-Fleming boundary) (O'Brien and Fleming 1979) for early termination to  
 415 reject the null hypothesis in favor of the alternative. The interim analysis will use  
 416 6-month neurocognitive free survival rate (NFP6). The efficacy boundary for  
 417 NPF6 is 0.0056 at the interim analysis.  
 418
- 419 16.72 Overall Survival  
 420 We use the Lan-Demets spending function (corresponding to the O'Brien-  
 421 Fleming boundary) (O'Brien and Fleming 1979) for early termination to reject  
 422 the null hypothesis in favor of the alternative. Specifically, the boundary for  
 423 declaring marginal superiority of SRS for OS is 0.0056 at the interim analysis  
 424 and the marginal superiority boundary for SRS is 0.0482 at the final analysis.  
 425
- 426 16.73 Interim Analysis  
 427 If the observed p-value for NPF6 is smaller than 0.0056 indicating superiority of  
 428 SRS in NPF6 and the observed p-value for OS is smaller than 0.0056 indicating  
 429 marginal superiority of SRS in OS, we may close the study and recommend the  
 430 SRS as the standard of care. For all other scenarios of the interim analysis, we  
 431 would recommend continue the accrual and wait till the final analysis to draw the  
 432 conclusion.  
 433
- 434 16.8 Secondary Endpoints and Analysis  
 435 Secondary endpoints include local control of the surgical bed, time to CNS failure and  
 436 various quality of life.  
 437
- 438 16.81 Local Control of Surgical Bed  
 439 Local control of surgical bed is defined as the absence of the development of  
 440 recurrent tumor in the surgical bed. There will be an evaluation of local control  
 441 of the surgical bed both locally by the local investigators and centrally; however  
 442 the central review will have precedence in the analyses. There will also be an  
 443 analysis of the impact of gross total resection or less than gross total resection as  
 444 defined by central review on local control of the surgical bed.  
 445
- 446 16.82 Time to CNS Failure  
 447 Time to CNS failure is defined as the date the patient is randomized on this study  
 448 to the date of diagnosis of disease progression. Notice the development of new  
 449 lesions in the brain outside the surgical bed will be counted as a disease  
 450 progression thus an event of CNS failure. Time to recurrent tumor in the surgical  
 451 bed and time to CNS failure will be estimated using Kaplan-Meier methods for  
 452 each arm and be compared between arms using Cox proportional hazard models  
 453 with all stratification factors adjusted. Hazard ratios and median of the  
 454 distributions will be estimated with their 95% confidence intervals.  
 455
- 456 16.83 Quality of Life  
 457 The primary QOL objective is to ascertain at 6 months (24 weeks) post-  
 458 randomization whether patients assigned to SRS have better QOL than patients  
 459 on WBRT. One-sided null hypotheses for improvement on SRS will be used.  
 460 The 6 month time point is proposed as being late enough to capture mor  
 461 treatment effects, but early enough to avoid a substantial difference between-arm  
 462 morbidity and mortality.

Version Date: 11/03/14

463 The QOL booklet will be administered at baseline, (after pre-registration, but prior to any  
 464 treatment) and at the beginning of each scheduled study visit after treatment (i.e., at 12  
 465 weeks and at 6, 9, 12, 16 and 24 months post randomization). The three specific QOL  
 466 endpoints of primary interest proposed are: brain subscale (using the BR subscale total  
 467 score) and physical and emotional functioning (using the respective subscale totals of the  
 468 FACT-BR). The primary analysis will be based on the corresponding change scores from  
 469 baseline to month 6, using two-sample t-tests and associated confidence intervals. To  
 470 explore any long-term difference between the two arms, score changes from baseline to  
 471 each time point after month 6 will also be compared graphically and using two sample t-  
 472 tests. The Bonferroni adjustment will be used to adjust the  $\alpha$  level (Type I error). In  
 473 addition, a mixed effect model may also be applied to data collected at all time points to  
 474 explore any trend difference between arms.  
 475

476 The relationship of the existence of missing data at specific time points to both baseline  
 477 assessment data and data from the immediate prior assessment, both using disease status  
 478 and scores, will provide a basis of assessing the degree to which missing data may be  
 479 informative (non- random). The existence of a significant amount of non-random  
 480 missing data will trigger attempts to impute missing data. In addition, the instances of  
 481 surrogate responders will be treated as both missing and non-missing data in order to  
 482 assess the degree to which the analyses are robust to assumptions about the nature of  
 483 missing or surrogate responder data.  
 484

485 Exploratory Generalized Estimating Equations (GEE) analysis (Horton and Lipsitz  
 486 1999) will be used to investigate the effect of treatment over time, incorporating  
 487 baseline and follow-up visits to 12 months, as well as the correlations within a  
 488 patient's data over time.

489 Various methods of handling missing data will be used, and the  
 490 robustness of the analyses to various assumptions about missing data will  
 491 be investigated. Also, the data will be analyzed according to whether the  
 492 patient completed the instruments, both with respect to assessing the  
 493 consistency of scoring and detecting differences between arms.  
 494

#### 495 The Quality-Adjusted Survival (QAS) Analysis

496 The QAS analysis will adjust each patient's time on study, by weighting  
 497 neurological signs and symptoms (a variety of weighting schemes will be  
 498 explored); the resultant weighted sum is defined as the patient's QTIME.  
 499 Subtracting the impact of AEs and re-treatment gives the QAS for each  
 500 patient (Murray *et al.*, 1995). The QAS values will be compared between  
 501 treatment arms by the two-sample t-test<sup>53</sup>

501 *Version Date: 11/03/14*

#### 503 Functional Independence

504 The duration of functional independence, where Barthel ADL Index  
 505 score is maintained at or above baseline level, will be compared between  
 506 treatment arms by the logrank test. A patient who's Barthel ADL Index  
 507 score has not decreased from baseline will be censored at the last valid  
 508 Barthel ADL Index assessment time. Kaplan-Meier plots of functional

509 independence will be presented, by treatment and estimates of the  
 510 corresponding median durations will be obtained. Similar, exploratory  
 511 analyses will be performed based on a decrease of  $\geq 4$  Barthel points, and  
 512 for decrease to 3 or 4 in ECOG/Zubrod scores.  
 513

514 16.9 a Correlative Endpoints and Analysis

515 Correlative endpoints include radiation changes in the limbic system and all kinds of  
 516 biomarkers specified in [Section 2.3](#). To explore the correlation between radiation changes  
 517 in the limbic system and neurotoxicity, descriptive and graphical methods will be used.  
 518 To explore the predictive effect of different biomarkers on neurocognitive decline,  
 519 continuous biomarkers will be evaluated between the NPF6 success vs. failure groups  
 520 using two-sample t-tests (or Wilcoxon rank sum tests as needed) as well as side-by-side  
 521 boxplots. Categorical biomarkers will be evaluated between the NPF6 success vs. failure  
 522 groups using Fisher exact tests (or Chi-squared tests as appropriate) as well as bar graphs.  
 523

524 16.9b Monitoring:

525  
 526 16.9b1 This study will be monitored by the Clinical Data Update System (CDUS)  
 527 version 4.0. An abbreviated report containing cumulative CDUS data will be  
 528 submitted quarterly to CTEP by electronic means. Reports are due January 31,  
 529 April 30, July 31, and October 31.  
 530

531 16.9b2 This study will be monitored by the NCCTG External Data Monitoring  
 532 Committee (DMC), an NCI-approved functioning body. Reports containing  
 533 efficacy, adverse event, and administrative information will be provided to the  
 534 DMC every six months as per NCI guidelines.  
 535

536 16.9c Inclusion of Women and Minorities

537 This study will be available to all eligible patients regardless of race, gender, or ethnic  
 538 group.  
 539

540 There is no information currently available regarding differential agent effects of this  
 541 regimen in subsets defined by race, gender, or ethnicity, and there is no reason to expect  
 542 such differences to exist. Therefore, although the planned analyses will, as always, look  
 543 for differences in treatment effect based on racial and gender groupings, the sample size is  
 544 not increased in order to provide additional power for such subset analyses. A total of 192  
 545 patients may be enrolled. Based on prior studies involving similar disease sites, we expect  
 546 about 7% of patients will be classified as minorities by race and about 40% of patients to  
 547 be women. Expected sizes of racial by gender subsets are shown in the following table:  
 548

Version Date: 11/03/14

|                           |                                                                                                                                                                                                                                                                          |
|---------------------------|--------------------------------------------------------------------------------------------------------------------------------------------------------------------------------------------------------------------------------------------------------------------------|
| <b>Ethnic Categories:</b> | <b>Hispanic or Latino</b> – a person of Cuban, Mexican, Puerto Rico, South or Central American, or other Spanish culture or origin, regardless of race. The term “Spanish origin” can also be used in addition to “Hispanic or Latino.”<br><b>Not Hispanic or Latino</b> |
|---------------------------|--------------------------------------------------------------------------------------------------------------------------------------------------------------------------------------------------------------------------------------------------------------------------|



549

|                           |                                                                                                                                                                                                                                                                                                                                                                                                                                                                                                                                                                                                                                                                                                                                                                                                                                                                                                                                                                                                                                                                                                                               |
|---------------------------|-------------------------------------------------------------------------------------------------------------------------------------------------------------------------------------------------------------------------------------------------------------------------------------------------------------------------------------------------------------------------------------------------------------------------------------------------------------------------------------------------------------------------------------------------------------------------------------------------------------------------------------------------------------------------------------------------------------------------------------------------------------------------------------------------------------------------------------------------------------------------------------------------------------------------------------------------------------------------------------------------------------------------------------------------------------------------------------------------------------------------------|
| <b>Racial Categories:</b> | <p><b>American Indian or Alaskan Native</b> – a person having origins in any of the original peoples of North, Central, or South America, and who maintains tribal affiliations or community attachment.</p> <p><b>Asian</b> – a person having origins in any of the original peoples of the Far East, Southeast Asia, or the Indian subcontinent including, for example, Cambodia, China, India, Japan, Korea, Malaysia, Pakistan, the Philippine Islands, Thailand, and Vietnam. (Note: Individuals from the Philippine Islands have been recorded as Pacific Islanders in previous data collection strategies.)</p> <p><b>Black or African American</b> – a person having origins in any of the black racial groups of Africa. Terms such as “Haitian” or “Negro” can be used in addition to “Black or African American.”</p> <p><b>Native Hawaiian or other Pacific Islander</b> – a person having origins in any of the original peoples of Hawaii, Guam, Samoa, or other Pacific Islands.</p> <p><b>White</b> – a person having origins in any of the original peoples of Europe, the Middle East, or North Africa.</p> |
|---------------------------|-------------------------------------------------------------------------------------------------------------------------------------------------------------------------------------------------------------------------------------------------------------------------------------------------------------------------------------------------------------------------------------------------------------------------------------------------------------------------------------------------------------------------------------------------------------------------------------------------------------------------------------------------------------------------------------------------------------------------------------------------------------------------------------------------------------------------------------------------------------------------------------------------------------------------------------------------------------------------------------------------------------------------------------------------------------------------------------------------------------------------------|

550

| Ethnic Category                               | Sex/Gender |   |       |       |
|-----------------------------------------------|------------|---|-------|-------|
|                                               | Females    |   | Males | Total |
| Hispanic or Latino                            | 5          | + | 8     | = 13  |
| Not Hispanic or Latino                        | 72         | + | 107   | = 179 |
| <b>Ethnic Category: Total of all Subjects</b> | 77         | + | 115   | = 192 |
| Racial Category                               |            |   |       |       |
| American Indian or Alaskan Native             | 1          | + | 2     | = 3   |
| Asian                                         | 2          | + | 2     | = 4   |
| Black or African American                     | 1          | + | 1     | = 2   |
| Native Hawaiian or other Pacific Islander     | 1          | + | 3     | = 4   |
| White                                         | 72         | + | 107   | = 179 |
| <b>Racial Category: Total of all subjects</b> | 77         | + | 115   | = 192 |

551

**Accrual** 555 **Total Expected**

552

**Rate:** 4-6 pts/month 556 **Accrual:** 174 Min 192 Max

553

**Projected Start Date of Study: 07/12/2011**

554

*Version Date: 11/03/14*

557 **17.0 Pathology Considerations/Tissue Biospecimens**

558  
559  
560  
561  
562  
563  
564  
565  
566  
567  
568

17.1 Tissue Biospecimen Submission

**Note:** It is optional that patients consent to submission of the tissue(s) listed in the following table. For optional paraffin-embedded tissues, the site must submit tissue being requested, if tissue is available.

**Note:** As outlined below submission of tissue below requires tissue from *both* the primary cancer and brain metastasis.

17.11 Summary Table of Tissue Biospecimens for This Protocol

| Tissue                                                                                                                                                               | Mandatory or optional | When to submit                    | Reason for submission | Protocol section with specific details |
|----------------------------------------------------------------------------------------------------------------------------------------------------------------------|-----------------------|-----------------------------------|-----------------------|----------------------------------------|
| Formalin-fixed paraffin-embedded (FFPE) tissue blocks with corresponding H&E<br><b>OR</b><br>unstained slides with two corresponding H&Es from primary cancer tissue | Optional              | ≤ 30 days following randomization | Tissue Banking        | <a href="#">Section 17.2</a>           |
| Formalin-fixed paraffin-embedded (FFPE) tissue blocks with corresponding H&E<br><b>OR</b><br>unstained slides with two corresponding H&Es from brain metastasis      | Optional              | ≤ 30 days following randomization | Tissue Banking        | <a href="#">Section 17.2</a>           |

Version Date: 11/03/14

569  
570  
571  
572  
573  
574  
575  
576  
577

17.2 Paraffin Embedded Tissue Blocks/Slides

At time of submitting slides or tissue blocks, the following materials below are required for shipment (please include the *patient study ID number* on all materials):

- All H&E slides, slides and/or blocks from primary cancer tissue and metastatic cancer tissue
- Research Tissue Submission Form
- Surgical Pathology Report
- Operative Report (*optional*)

578 17.21 FFPE Tissue Block and H&E Slide Submission  
 579 Submit one formalin fixed paraffin-embedded (FFPE) tumor tissue block with  
 580 representative tumor from the primary cancer and brain metastasis. **A**  
 581 **corresponding H&E slide for each submitted block must be provided to**  
 582 **permit quality assurance (QA) of each tissue block.** Once the QA is  
 583 completed, all stained slides will be returned. If a block is not available a tissue  
 584 punch (2 mm) of the block is acceptable.

585  
 586 Alternatively, **if the institution is unable to provide a tissue block**, submit  
 587 15 five micron sections mounted on charged glass slides and 5 ten micron  
 588 sections mounted on uncharged glass slides. **Label the slides with patient study**  
 589 **ID number, accession number, and order of sections cut (i.e., 1-15 for the**  
 590 **five micron slides), and thickness of section (i.e., five microns).** H&E stain  
 591 every 10th 5 micron slides that is cut (i.e., slides labeled 1 and 15). These slides  
 592 will be reviewed centrally under the research base's quality assessment protocol.  
 593 For samples containing less than 7 square millimeters of tumor tissue, multiple  
 594 sections should be mounted onto each slide to ensure that the appropriate amount  
 595 of tumor tissue is available. Ideally, each slide must have a minimum of 75%  
 596 tumor tissue on the slide to be deemed adequate for study. **Do not bake or place**  
 597 **covers slips on the slides.**

598  
 599 17.22 Shipping Instructions and Precautions  
 600

601 17.221 The block/slides must be appropriately packed to prevent damage (e.g.,  
 602 slides should be placed in appropriate slide container) and placed in an  
 603 individual plastic bag. Label the bag with the protocol number, patient  
 604 initials and patient study ID number.

605  
 606 17.222 Tissue specimens should be shipped ≤ 30 days after registration.  
 607

608 17.223 Verify that the appropriate sections of the Research Tissue Submission  
 609 Form are completed and filled in correctly. Enter information from the  
 610 Research Tissue Submission Form into the remote data entry system  
 611 on the same day the specimen is submitted (see Forms Packet).  
 612

613 17.23 Shipping Address

614 Ship all block/slide tissue specimens and accompanying materials to the NCCTG  
 615 Research Base at the following address: 53  
 616 NCCTG Operations Office  
 617 Attn: PC Office  
 618 RO\_FF\_03\_24-CC/NW Clinic  
 619 200 First Street SW  
 620 Rochester, MN 55905

Version Date: 11/03/14

621  
 622 17.3 Tissue Banking Procedures

623 If corresponding H&E slides were not submitted with the tissue specimen, the NCCTG  
 624 Operations Office will request a slide to be processed (i.e., cut and H&E stained) from  
 625 the tumor tissue block. Processing will be performed in the NCCTG Research Base  
 626 Pathology Resource Core (PRC), formerly Tissue and Cell Molecular Analysis  
 627 (TACMA) Shared Resource, Mayo Clinic Rochester.

628 The NCCTG Operations Office will forward the blocks and/or H&E slide(s) to Dr.  
 629 Giannini and/or associates, Mayo Clinic Rochester, to be reviewed under the research  
 630 base's protocol for assessing tissue quality for the proposed banking.

631  
 632 After the pathologist assesses the tissue quality, the block and appropriate paperwork will  
 633 be returned to the NCCTG Operations Office.

634  
 635 At the completion of the study, material will be banked in the NCCTG Operations Office  
 636 (Attn: Pathology Coordinator) for future research according to the patient consent  
 637 permission (see [Section 6.155](#)). Potential future research may include  
 638 immunohistochemistry (IHC) analyses, DNA extraction, and/or tissue microarray (TMA)  
 639 construction to analyze predictive biomarkers, changes in expression pattern with  
 640 therapy, and correlation with response and/or adverse events. When a protocol is  
 641 developed, it will be presented for IRB review and approval.

#### 642 17.4 Specimen Registration and Tracking

643  
 644  
 645 USE OF THE ALLIANCE BIOSPECIMEN MANAGEMENT SYSTEM (BioMS) IS  
 646 MANDATORY AND ALL SPECIMENS MUST BE LOGGED AND SHIPPED VIA  
 647 THIS SYSTEM.

648 BioMS is a web-based system for logging and tracking all biospecimens collected on  
 649 Alliance trials. Authorized individuals may access BioMS at the following URL:  
 650 <http://bioms.allianceforclinicaltrialsinoncology.org> using most standard web browsers  
 651 (Safari, Firefox, Internet Explorer). For information on using the BioMS system, please  
 652 refer to the 'Help' links on the BioMS web page to access the on-line user manual, FAQs,  
 653 and training videos. To report technical problems, such as login issues or application  
 654 errors, please contact: 1-855-55-BIOMS or [Bioms@alliancencn.org](mailto:Bioms@alliancencn.org). For assistance in  
 655 using the application or questions or problems related to specific specimen logging, please  
 656 contact: 1-855-55-BIOMS or [Bioms@alliancencn.org](mailto:Bioms@alliancencn.org).

657 After logging collected specimens in BioMS, the system will create a shipping manifest.  
 658 This shipping manifest must be printed and placed in the shipment container with the  
 659 specimens.

660 All submitted specimens must be labeled with the protocol number (N107C), patient ID,  
 661 patient's initials and date and type of specimen collected (e.g., serum, whole blood).

662 A copy of the Shipment Packing Slip produced by BioMS must be printed and placed in  
 663 the shipment with the specimens.

664 *Version Date: 1/1/2014* Please be sure to use a method of shipping that is secure and traceable. Extreme heat  
 665 precautions should be taken when necessary.

666 **18.0 Records and Data Collection Procedures**

667

668 18.1 Submission Timetable

669

670 **Pre-Registration Material(s)**

|                                         |                                                                                                |
|-----------------------------------------|------------------------------------------------------------------------------------------------|
| <b>Case Report Form (CRF)</b>           | <b>Active-Monitoring Phase</b><br>(Compliance with Test Schedule <a href="#">Section 4.0</a> ) |
| Pre-Registration Screening Failure Form | Complete only if patient is NOT randomized after he/she is pre-registered                      |

671

672 **Initial Material(s)**

673

| <b>CRF</b>                                                            | <b>Active-Monitoring Phase</b><br>(Compliance with Test Schedule Section 4.0)                         |
|-----------------------------------------------------------------------|-------------------------------------------------------------------------------------------------------|
| Response Review Material1                                             | Submit ≤ 14 days after randomization if withdrawal/refusal occurs prior to beginning protocol therapy |
| End of Active Treatment /Cancel Notification Form                     |                                                                                                       |
| On-Study Form                                                         | ≤ 14 days after randomization                                                                         |
| Baseline Adverse Event Form                                           |                                                                                                       |
| Pretreatment Measurement Form                                         |                                                                                                       |
| Research Blood Submission Form (See Section 14.0)                     |                                                                                                       |
| Research Urine Submission Form (See Section 14.0)                     |                                                                                                       |
| Patient Questionnaire Booklet Quality of Life (QOL)2,3                |                                                                                                       |
| Functional Independence3                                              |                                                                                                       |
| Neurocognitive Testing Booklet 2,4                                    |                                                                                                       |
| Patient Questionnaire Booklet Quality of Life (QOL) Compliance Form 5 |                                                                                                       |
| Neurocognitive Testing Booklet Compliance Form                        |                                                                                                       |
| Concomitant Steroid and Anticonvulsant Treatment Form                 |                                                                                                       |
| <b>CRF</b>                                                            | <b>Active-Monitoring Phase</b><br>(Compliance with Test Schedule <a href="#">Section 4.0</a> )        |
| Pathology materials (For optional tissue submission)                  | ≤ 30 days after randomization                                                                         |
| Research Tissue Submission Form                                       | ≤ 30 days after randomization                                                                         |

674

- 675 1. Submit the following to **NCCTG Operations Office, Attn: QAS for N107C, NW Clinic 3-24 CC,**
- 676 **200 First Street SW, Rochester MN 55905**

677 Submit the reports **AND** the radiographic images free of marks that may obscure the lesions or bias

678 the evaluation of the independent reviewer(s). Images on CDs are preferred to film but must be

679 DICOM compatible with a viewing tool. The radiographic images must be identified with the

680 NCCTG study number of N107C and the assigned patient identification number. The radiographic

681 images must be identified with the date the image was performed and the corresponding time point in

682 the study (e.g., week 12, month 9 or month 24). As outlined below *all* pre-randomization and

683 completion of therapy MRI or CT scans should be submitted. See [Section 11.8](#) for additional details.

- 684
- 685 a. Pre-randomization MRI or CT scans and reports (reports may not be available with planning  
686 scans but if available should be submitted). **Separate copies of these CDs must be sent to**  
687 **the Radiation Coordinator and the QAS for N107C.**
- 688 b. Post-treatment MRI or CT scans at week 12 and at 6, 9, 12, 16, and 24 months. These studies  
689 will be reviewed by the NCCTG PIs for central review of local control of surgical bed.  
690
- 691 2. Original questionnaire booklets **must** be used; copies are not acceptable for this submission.  
692
- 693 3. Submit original Patient QOL Questionnaire Booklet and Functional Independence form to the  
694 NCCTG Operations Office, Attn: QAS for N107C NW Clinic 3-24 CC, 200 First Street SW,  
695 Rochester MN 55905  
696
- 697 4. Submit **original** Patient Neurocognitive Testing Questionnaire Booklet to NCCTG Operations Office,  
698 Attn: QAS for N107C, NW Clinic 3-24 CC, 200 First Street SW, Rochester MN 55905  
699
- 700 5. This form must be completed **only** if the Patient QOL Questionnaire Booklet contains absolutely **NO**  
701 patient provided assessment information.

702 **Test Schedule Material(s)**  
703

| CRF                                                                                                                              | Active-Monitoring Phase<br>(Compliance with Test Schedule Section 4.0) |                                                                                                |
|----------------------------------------------------------------------------------------------------------------------------------|------------------------------------------------------------------------|------------------------------------------------------------------------------------------------|
|                                                                                                                                  | At end of treatment <sup>10</sup><br>(week 12 follow up)               | At each evaluation during observation <sup>10</sup><br>(6, 9, 12, 16, and 24 month follow ups) |
| Evaluation/Treatment Form                                                                                                        | X <sup>1</sup>                                                         |                                                                                                |
| Evaluation/Observation Form                                                                                                      |                                                                        | X                                                                                              |
| End of Active Treatment/Cancel Notification Form                                                                                 | X                                                                      |                                                                                                |
| Adverse Event Form                                                                                                               | X                                                                      | X                                                                                              |
| Active Monitoring Measurement Form (Resected Surgical Cavity Form or Unresected Brain Metastases Form, whichever is appropriate) | X <sup>2</sup>                                                         | X <sup>2</sup>                                                                                 |
| Radiation Therapy Material                                                                                                       | X <sup>3</sup>                                                         |                                                                                                |
| Response Review Material                                                                                                         | X <sup>4</sup>                                                         | X <sup>4</sup>                                                                                 |
| Research Blood Submission Form                                                                                                   | X <sup>5</sup>                                                         | X <sup>5</sup>                                                                                 |
| Research Urine Submission Form                                                                                                   | X <sup>5</sup>                                                         | X <sup>5</sup>                                                                                 |
| Patient QOL Questionnaire                                                                                                        | X <sup>6,7</sup>                                                       | X <sup>6,7</sup>                                                                               |
| Functional Independence                                                                                                          | X <sup>7</sup>                                                         | X <sup>7</sup>                                                                                 |
| Neurocognitive Testing Booklet                                                                                                   | X <sup>6,8</sup>                                                       | X <sup>6,8</sup>                                                                               |
| Patient QOL Questionnaire Booklet Compliance Form                                                                                | X <sup>9</sup>                                                         | X <sup>9</sup>                                                                                 |
| Neurocognitive Testing Booklet Compliance Form                                                                                   | X                                                                      | X                                                                                              |
| Concomitant Steroid and Anticonvulsant Treatment Form                                                                            | X                                                                      | X                                                                                              |
| Notification Form – Grade 4 or 5 Non-AER Reportable Events/Hospitalization Form                                                  | At each occurrence<br>(see Section 10.0)                               |                                                                                                |
| ADR/AER                                                                                                                          |                                                                        |                                                                                                |
| Late Adverse Event                                                                                                               |                                                                        |                                                                                                |

- 704  
705  
706  
707  
708  
709  
710  
711  
712  
713  
714  
715  
716  
718
1. Cycle 1 only.
  2. Submit copy of documentation of response or progression to the NCCTG Operations Office, Attn: QAS for N107C, NW Clinic 3-24 CC, 200 First Street SW, Rochester MN 55905  
Version Date: 11/03/14 53
  3. **All participating sites submit the following to NCCTG Operations Office**  
For patients who do not receive any scheduled radiation therapy, submit the Radiation Therapy Reporting Form with the reason radiation was not given to the address given at the end of this paragraph. For patients who receive partial or complete radiation therapy, submit the following materials ≤ 14 days after the last day of radiation to the NCCTG Operations Office, RT Coordinator, NW Clinic 3-24 CC, 200 First Street SW, Rochester, MN 55905. **All paperwork and images should be de-identified, and labeled with study number, patient initials and study ID number.**
    - a. RT reporting form. (Arm A only).
    - b. SRS reporting forms for both SRS plan to surgical bed and if applicable SRS to unresected brain metastases:
      - For 1 unresected lesion complete SRS reporting Form Site 1
- 719  
720  
721  
722

- 723                   • For 2 unresected lesions complete SRS reporting Form Site 1 and Site 2.  
 724                   • For 3 unresected lesions complete SRS reporting Form Site 1, Site 2 and Site 3.  
 725           c. Daily treatment records (Arm A Only).  
 726           d. Dosimetry calculations (Arm A only), monitor unit calculations (Arm A only), and color  
 727           copies of the required isodose curves.  
 728           e. Color copies of required DVH's (as applicable and including CTV).  
 729           f. Copies of representative simulation (and/or Beams Eye View, BEV) films of all treated fields  
 730           (Arm A only).  
 731           g. Copies of representative port (and/or Digitally Reconstructed Radiographs, DRR) films of all  
 732           treated fields (Arm A only).  
 733           h. Copies of pre-randomization and planning contrasted MRI or CT brain scans. **Separate**  
 734           **copies of the CD must be sent to the Radiation Coordinator and the QAS for N107C.**  
 735           Note: When images are submitted on CD(s), they **must** include a viewing tool.  
 736  
 737   4. Submit the following to NCCTG Operations Office, Attn: QAS for N107C NW Clinic 3-24, 200 First  
 738   Street SW, Rochester MN 55905  
 739   Submit the reports AND the following radiographic images free of marks that may obscure the  
 740   lesions or bias the evaluation of the independent reviewer(s). Images on CDs are preferred to film but  
 741   must be DICOM compatible with a viewing tool. The radiographic images must be identified with the  
 742   NCCTG study number of N107C and the assigned patient identification number. The radiographic  
 743   images must be identified with the date the image was performed and the corresponding time point in  
 744   the study (e.g., week 12, month 9 or month 24). As outlined below *all* pre-randomization and  
 745   completion of therapy MRI or CT scans should be submitted. See [Section 11.8](#) for additional details.  
 746  
 747           a. Pre-randomization MRI or CT scans and reports (reports may not be available with planning  
 748           scans but if available should be submitted). **Separate copies of these CDs must be sent to**  
 749           **the Radiation Coordinator and the QAS for N107C**  
 750  
 751           b. Post-randomization MRI or CT scans at week 12 and at months 6, 9, 12, 16, and 24. These  
 752           studies will be reviewed by the Alliance PIs for central review of local control of surgical  
 753           bed.  
 754  
 755   5. Submit for the 12 week, 6 month, and 12 month post-randomization visits only.  
 756  
 757   6. Original questionnaire booklets **must** be used; copies are not acceptable for this submission.  
 758  
 759   7. Submit original Patient QOL Questionnaire Booklet and Functional Independence form to the  
 760   NCCTG Operations Office, Attn: QAS for N107C, NW Clinic 3-24, 200 First Street SW, Rochester  
 761   MN 55905  
 762  
 763   8. Submit **original** Patient Neurocognitive Testing Questionnaire Booklet to NCCTG Operations Office,  
 764   Attn: QAS for N107C, NW Clinic 3-24, 200 First Street SW, Rochester MN 55905  
 765  
 766   9. This form must be completed **only** if the Patient QOL Questionnaire Booklet contains absolutely **NO**  
 767   patient provided assessment information.  
 768  
 769   10. **Treatment:**  
 770        Cycle 1 = starts day 1 of treatment and ends at week 12 follow up.

Version Date: 11/05/14



771  
772  
773  
774  
775  
776  
777  
778  
779

**Follow up/Observation:**

- Cycle 2 = starts at 12 weeks and ends at 6 month follow up.
- Cycle 3 = starts at 6 months and ends at 9 month follow up.
- Cycle 4 = starts at 9 months and ends at 12 month follow up.
- Cycle 5 = starts at 12 months and ends at 16 month follow up.
- Cycle 6 = starts at 16 months and ends at 24 month follow up.

**Follow-up Material(s)**

| CRF                   | Event Monitoring Phase <sup>1</sup> |                |                    |
|-----------------------|-------------------------------------|----------------|--------------------|
|                       | Every 6 months                      | Death          | New primary        |
| Event Monitoring Form | X <sup>2</sup>                      | X              | At each occurrence |
| Autopsy Reports       |                                     | X <sup>3</sup> | At each occurrence |

780  
781  
782  
783  
784  
785  
786  
787  
788  
789  
790  
791  
792  
793  
794

1. If a patient is still alive 5 years after randomization, no further follow-up is required.
2. An Event Monitoring Form should be completed for patient withdrawal/refusal, adverse event/side effects/complications, off-treatment for other complicating disease, and death. Patients should also go to event monitoring after 24 months from randomization. Patients in event monitoring should complete an event monitoring form every 6 months until 5 years from randomization.  
**Note:** Patients should *not* go to event monitoring in the event of progressive disease and should continue to be followed using the test schedule for observation (e.g. complete neurocognitive testing, MRI or CT scans, etc.) even in the event of progressive disease (PD) until withdrawal, refusal, death or 24 months from randomization. Submit copy of documentation of progression to the NCCTG Operations Office, Attn: QAS for N107C, NW Clinic 3-24, 200 First Street SW, Rochester MN 55905
3. Submit if available.

795  
796  
797  
798  
799  
800  
801  
802  
803  
804  
805  
806  
807  
808  
809  
810  
811  
812  
813  
814  
815

18.2 Additional Submission Instructions

18.21 Non-NCCTG CTSU Sites

18.211 CTSU sites will fax forms (except Patient and Examiner Questionnaire Booklets, see [Section 18.0](#)) to NCCTG Operations Office, Attn: N107C QAS at (507) 266-7240.

*Version Date: 11/03/14*

18.212 CTSU sites will submit **original** Patient QOL Questionnaire Booklet and Functional Independence form to the NCCTG Operations Office, Attn: QAS for N107C, NW Clinic 3-24, 200 First Street SW, Rochester MN

18.213 CTSU sites will submit original Patient Neurocognitive Testing Questionnaire Booklet to NCCTG Operations Office, Attn: QAS for N107C, NW Clinic 3-24CC, 200 First Street SW, Rochester MN 55905

18.22 Labeling of Submitted Materials

Each site will be responsible for insuring that all materials contain the patient's initials, study ID number, and protocol number. Patient's name must be removed.

- 816 18.23 Incomplete or Missing Materials  
 817 Any materials deemed incomplete by the NCCTG Operations Office will be  
 818 considered “not received” and will not be edited or otherwise processed until the  
 819 missing information is received. A list of the missing documents will be made  
 820 available to the institution responsible for the patient.  
 821  
 822 18.24 Overdue Lists  
 823 A list of overdue materials and forms for study patients will be generated  
 824 monthly. The listings will be sorted by location and will include the patient study  
 825 registration number. NCCTG will contact the patients’ institutions in order to  
 826 obtain the overdue material.  
 827  
 828 834 18.25 Correction Forms  
 829 835 If a correction is made by NCCTG, a correction form will be sent to the  
 830 836 institution to make the correction on the institution’s form. In cases of  
 831 837 disagreement with a given correction, a query letter may be written.  
 832 **19.0 Budget**  
 833  
 839 19.1 Costs Charged to Patient  
 840 Routine clinical care  
 841  
 842 19.2 Tests to be Research Funded  
 843 Correlative research tests of submitted blood and urine specimens.  
 844  
 845 19.3 Paired Tissue Submission Payment  
 846 NCCTG will reimburse sites up to \$300 for the costs associated with contributing the  
 847 paired tissue specimens. Tissue from **both** the primary cancer and brain metastasis **are**  
 848 **required for this reimbursement.**  
 849  
 850 19.4 Other Budget Concerns  
 851 There will be no charges associated with QOL or neurocognitive assessments.

852 **20.0 References**

- 853
- 854 Akama, K. *et al.* (1998). Amyloid beta-peptide stimulates nitric oxide production in astrocytes through an  
855 NFkappaB-dependent mechanism. *PNAS* **95**(10): 5795-800.
- 856
- 857 Aoyama, H. *et al.* (2006). Stereotactic radiosurgery plus whole-brain radiation therapy vs stereotactic  
858 radiosurgery alone for treatment of brain metastases: a randomized controlled trial. *JAMA* **295**(21): 2483-  
859 91.
- 860
- 861 Beal, M. F. (1995). Aging, energy, and oxidative stress in neurodegenerative diseases. *Ann Neurol* **38**(3):  
862 357-66.
- 863
- 864 Benton, A. L. and K. Hamsher (1978). The multilingual aphasia examination. Iowa City.
- 865
- 866 Blonder, L. X. *et al.* (1999). Short-term neuropsychological outcome following Gamma Knife  
867 radiosurgery for arteriovenous malformations: a preliminary report. *App Neurospsychol* **6**(3): 181-6.  
868
- 869 Blum-Degen, D. *et al.* (1995). Interleukin-1 beta and interleukin-6 are elevated in the cerebrospinal fluid  
870 of Alzheimer's and de novo Parkinson's disease patients. *Neurosci Letters* **202**(1-2): 17-20.  
871
- 872 Brandt, J. (1991). The Hopkins verbal learning test: Development of a new memory test with six  
873 equivalent forms. *Clin Neuropsychol* **5**: 125-142  
874 .
- 875 Brazil, L. *et al.* (1997). Verbally administered Barthel Index as functional assessment in brain tumour  
876 patients. *J Neuro Oncol* **34**(2): 187-92.  
877
- 878 Bretscher, M. *et al.* (1999). Quality of life in hospice patients: a pilot study. *Psychosomatics* **40**(4): 309-  
879 13.  
880
- 881 Brown, P. D. *et al.* (2008). Adjuvant whole brain radiotherapy: strong emotions decide but rational  
882 studies are needed. *Intl J Radiat Oncol Biol Phys* **70**(5): 1305-9.  
883
- 884 Brown, P. D. *et al.* (2009). Adjuvant whole brain radiotherapy: strong emotions decide but rationale  
885 studies are needed: in regard to Brown et al. (*Intl J Radiat Oncol Biol Phys* 2008 **70**:1305-1309). In reply  
886 to Drs. Larson and Sahgal. *Intl J Radiat Oncol Biol Phys* **75**(1): 316-7.  
887
- 888 Buchanan, D. R. *et al.* (2005). Research-design issues in cancer-symptom-management trials using  
889 complementary and alternative medicine: lessons from the National Cancer Institute Community Clinical  
890 ~~Oncology Program~~ experience. *J Clin Oncol* **23**(27): 6682-9. 53  
891
- 892 Cacabelos, R., X. *et al.* (1994). Serum tumor necrosis factor (TNF) in Alzheimer's disease and multi-  
893 infarct dementia. *Methods Findings in Exp Clin Pharmacol* **6**(1): 29-35.  
894
- 895 Caselli, R. J. *et al.* (2009). Longitudinal modeling of age-related memory decline and the APOE epsilon4  
896 effect. *NEJM* **361**(3): 255-63.  
897
- 898 Chang, E. L. *et al.* (2009). Neurocognition in patients with brain metastases treated with radiosurgery or  
899 radiosurgery plus whole-brain irradiation: a randomised controlled trial. *Lancet Oncol* **10**(11): 1037-44.  
900
- 901 Crawford, F. *et al.* (2009). Apolipoprotein E-genotype dependent hippocampal and cortical responses to  
902 traumatic brain injury. *Neurosci* **159**(4): 1349-62.

- 903 Curnes, J. T. *et al.* (1986). MRI of radiation injury to the brain. *Am J Roentgenol* **147**(1): 119-24.  
 904
- 905 Ding, Q. *et al.* (2006). Insulin-like growth factor I interfaces with brain-derived neurotrophic factor-  
 906 mediated synaptic plasticity to modulate aspects of exercise-induced cognitive function. *Neurosci* **140**(3):  
 907 823-33  
 908 .
- 909 Do, L. *et al.* (2009). Resection followed by stereotactic radiosurgery to resection cavity for intracranial  
 910 metastases. *Intl J Radiat Oncol Biol Phys* **73**(2): 486-91.  
 911
- 912 Foster, T. C. (2006). Biological markers of age-related memory deficits: treatment of senescent  
 913 physiology. *CNS Drugs* **20**(2): 153-66  
 914 .
- 915 Freidlin, B. *et al.* (2007). Randomized clinical trial design for assessing noninferiority when superiority is  
 916 expected. *J Clin Oncol* **25**(31): 5019-23  
 917
- 918 Grunberg, S. M. *et al.* (1996). Comparison of conditional quality of life terminology and visual analogue  
 919 scale measurements. *Quality of Life Research* **5**(1): 65-72.  
 920
- 921 Gudex, C. *et al.* (1996). Health state valuations from the general public using the visual analogue scale.  
 922 *Quality of Life Research* **5**(6): 521-31.  
 923
- 924 Helbecque, N. and P. Amouyel (2004). Commonalities between genetics of cardiovascular disease and  
 925 neurodegenerative disorders. *Current Opinion in Lipidology* **15**(2): 121-7.  
 926
- 927 Horton, N. J. and S. R. Lipsitz (1999). Review of software to fit generalized estimating equation  
 928 regression models. *Am Statistician* **53**: 160-169.  
 929
- 930 Hwang, S. W. *et al.* (2010). Adjuvant Gamma Knife radiosurgery following surgical resection of brain  
 931 metastases: a 9-year retrospective cohort study. *J Neurooncol* **98**: 77-82.  
 932
- 933 Hyland, M. E. and S. C. Sodergren (1996). Development of a new type of global quality of life scale, and  
 934 comparison of performance and preference for 12 global scales. *Quality of Life Research* **5**(5): 469-80.  
 935
- 936 Jensen, C.A. *et al.* (2010) Cavity-directed radiosurgery as adjuvant therapy after resection of a brain  
 937 metastasis. *J Neurosurgery* [Epub ahead of print].  
 938
- 939 Kinhult, S. *et al.* (2005). Local radiotherapy after resection of single brain metastasis. *Neuro Oncol* **7**(3):  
 940 390.  
 941
- 942 *Version Date: 11/03/14* 53  
 942 Kocher, M. *et al.* (2009). Adjuvant Whole Brain Radiotherapy vs. Observation after Radiosurgery or  
 943 Surgical Resection of 1–3 Cerebral Metastases - Results of the EORTC 22952-26001 Study. *Intl J Radiat*  
 944 *Oncol Biol Phys* **75**(3): S5 (abstract #9).  
 945
- 946 Krabbe, K. S. *et al.* (2004). Inflammatory mediators in the elderly. *Exp Gerontol* **39**(5): 687-99.  
 947
- 948 Li, J. *et al.* (2007). Regression after whole-brain radiation therapy for brain metastases correlates with  
 949 survival and improved neurocognitive function. *J Clin Oncol* **25**(10): 1260-6.  
 950
- 951 Martinez, M. *et al.* (2000). Increased cerebrospinal fluid fas (Apo-1) levels in Alzheimer's disease.  
 952 Relationship with IL-6 concentrations. *Brain Research* **869**(1-2): 216-9.

- 953 McPherson, C. M. *et al.* (2010). Adjuvant whole-brain radiation therapy after surgical resection of single  
954 brain metastases. *Neuro-Oncol* **12**(7): 711-719.  
955
- 956 Mehta, M. P. *et al.* (2009). Motexafin gadolinium combined with prompt whole brain radiotherapy  
957 prolongs time to neurologic progression in non-small-cell lung cancer patients with brain metastases:  
958 results of a phase III trial. *Intl J Radiat Oncol Biol Phys* **73**(4): 1069-76  
959 .
- 960 Meyers, C. A. and P. D. Brown (2006). Role and relevance of neurocognitive assessment in clinical trials  
961 of patients with CNS tumors. *J Clin Oncol* **24**(8): 1305-9.  
962
- 963 Meyers, C. A. *et al.* (2004). Neurocognitive function and progression in patients with brain metastases  
964 treated with whole-brain radiation and motexafin gadolinium: results of a randomized phase III trial. *J*  
965 *Clin Oncol* **22**(1): 157-65.  
966
- 967 Morrow, J. D. *et al.* (1992). Non-cyclooxygenase-derived prostanoids (F2-isoprostanes) are formed in situ  
968 on phospholipids. *PNAS* **89**(22): 10721-5.  
969
- 970 Murray, K. J. *et al.* (1995). Quality-adjusted survival analysis of malignant glioma. Patients treated with  
971 twice-daily radiation (RT) and carmustine: a report of Radiation Therapy Oncology Group (RTOG) 83-  
972 02. *Intl J Radiat Oncol Biol Phys* **31**(3): 453-9.  
973
- 974 Narayana, A. *et al.* (2006). A phase II trial of stereotactic radiosurgery boost following surgical resection  
975 for solitary brain metastases. *J Clin Oncol* **24**(18S): 71s (abstract # 1552).  
976
- 977 Noordijk, E. M. *et al.* (1994). The choice of treatment of single brain metastasis should be based on  
978 extracranial tumor activity and age. *Intl J Radiat Oncol Biol Phys* **9**(4): 711-7.  
979
- 980 O'Brien, P. C. and T. R. Fleming (1979). A multiple testing procedure for clinical trials. *Biometrics* **35**(3):  
981 549-56.  
982
- 983 Patchell, R. A. *et al.* (1998). Postoperative radiotherapy in the treatment of single metastases to the brain:  
984 a randomized trial. *JAMA* **280**(17): 1485-9.  
985
- 986 Patchell, R. A. *et al.* (1990). A randomized trial of surgery in the treatment of single metastases to the  
987 brain. *NEJM* **322**(8): 494-500.  
988
- 989 Pocock, S. J. and R. Simon (1975). Sequential treatment assignment with balancing for prognostic factors  
990 in the controlled clinical trial. *Biometrics* **31**(1): 103-15.  
991 *Version Date: 11/03/14* 53
- 992 Quigley, M. R. *et al.* (2008). Single session stereotactic radiosurgery boost to the post-operative site in  
993 lieu of whole brain radiation in metastatic brain disease. *J Neuro Oncol* **87**(3): 327-32.  
994
- 995 Raber, J. (2010). Unintended effects of cranial irradiation on cognitive function. *Toxicol Pathol* **38**(1):  
996 198-202.  
997
- 998 Reitan, R. M. (1958). Validity of the Trail Making Test as an indicator of organic brain damage.  
999 *Perceptual and Motor Skills* **8**: 271-276.  
1000
- 1001 Roberge, D. *et al.* (2009). Whole-brain radiotherapy and tumor bed radiosurgery following resection of  
1002 solitary brain metastases. *J Neuro Oncol* **95**(1): 95-9.

- 1003 Ryu, S. *et al.* (2009). Surgical resection plus radiotherapy only to the resection cavity for solitary brain  
 1004 metastasis: ten-year experience. *Intl J Radiat Oncol Biol Phys* **75**(3): 102.  
 1005
- 1006 Sloan, J. A. *et al.* (2009). Validation of and normative data for simple single-item numerical analogue  
 1007 self-assessments for quality of life. *J Pain Symptom Management*. Submitted.  
 1008
- 1009 Sloan, J. A. *et al.* (2009). A patient-level pooled analysis of the prognostic significance of baseline fatigue  
 1010 for overall survival (OS) among 3,915 patients participating in 43 North Central Cancer Treatment Group  
 1011 (NCCTG) and Mayo Clinic Cancer Center (MC) oncology clinical trials. *J Clin Oncol* **27**(15S): 507S.  
 1012
- 1013 Soltys, S. G. *et al.* (2008). Stereotactic radiosurgery of the postoperative resection cavity for brain  
 1014 metastases. *Intl J Radiat Oncol Biol Phys* **70**(1): 187-93.  
 1015
- 1016 Soltys, S. G. *et al.* (2010). Stereotactic radiosurgery of the postoperative resection cavity for brain  
 1017 metastases; optimization of the treatment techniques. *Intl J Radiat Oncol Biol Phys* **78**(3S): 7.  
 1018
- 1019 Steinvorth, S. *et al.* (2002). Cognitive function in patients with cerebral arteriovenous malformations after  
 1020 radiosurgery: prospective long-term follow-up. *Intl J Radiat Oncol Biol Phys* **54**(5): 1430-7.  
 1021
- 1022 Tan, A. D. *et al.* (2008). A patient-level meta-analytic investigation of the prognostic significance of  
 1023 baseline quality of life (QOL) for overall survival (OS) among 3,704 patients participating in 24 North  
 1024 Central Cancer Treatment Group (NCCTG) and Mayo Clinic Cancer Center (MC) oncology clinical  
 1025 trials. *J Clin Oncol* **26**(15S): 505S.  
 1026
- 1027 Tarkowski, E. *et al.* (1999). Intracerebral production of tumor necrosis factor-alpha, a local  
 1028 neuroprotective agent, in Alzheimer disease and vascular dementia. *J Clin Immunol* **19**(4): 223-30.  
 1029
- 1030 Teunissen, C. E. *et al.* (2002). Biochemical markers related to Alzheimer's dementia in serum and  
 1031 cerebrospinal fluid. *Neurobiol Aging* **23**(4): 485-508.  
 1032
- 1033 Tomura, N. *et al.* (2006). Diffusion changes in a tumor and peritumoral tissue after stereotactic irradiation  
 1034 for brain tumors: possible prediction of treatment response. *J Computer Asst Tomography* **30**(3): 496-500.  
 1035
- 1036 Tuszynski, M. H. *et al.* (2005). A phase 1 clinical trial of nerve growth factor gene therapy for Alzheimer  
 1037 disease. *Nature Medicine* **11**(5): 551-5.  
 1038
- 1039 Villasana, L. *et al.* (2008). Passive avoidance learning and memory of <sup>56</sup>Fe sham-irradiated and irradiated  
 1040 human apoE transgenic mice. *Radiationnaia Biologiya, Radioecologia* **48**(2): 167-70.  
 1041 *Version Date: 11/03/14* 53
- 1042 Vogelbaum, M. A. (2009). Ongoing Controversies in Cranial Radiosurgery. Third Annual International  
 1043 Symposium on Stereotactic Body Radiation Therapy and Stereotactic Radiosurgery.  
 1044
- 1045 Wade, D. T. (1992). Measurement in neurological rehabilitation. *Current Opinion in Neurology &*  
 1046 *Neurosurgery* **5**(5): 682-6.  
 1047
- 1048 Weitzner, M. A. *et al.* (1995). The Functional Assessment of Cancer Therapy (FACT) scale.  
 1049 Development of a brain subscale and revalidation of the general version (FACT-G) in patients with  
 1050 primary brain tumors. *Cancer* **75**(5): 1151-61.  
 1051
- 1052 Yaffe, K. *et al.* (2003). Inflammatory markers and cognition in well-functioning African-American and  
 1053 white elders. *Neurol* **61**(1): 76-80.

1054  
1055  
1056  
1057

**Appendix I: ECOG Performance Status Criteria**

| <b>ECOG Performance Status Criteria</b> |                                                                                                                                                                                       |
|-----------------------------------------|---------------------------------------------------------------------------------------------------------------------------------------------------------------------------------------|
| <b>Description</b>                      |                                                                                                                                                                                       |
| <b>Grade 0</b>                          | Normal activity. Fully active, able to carry on all pre-disease performance without restriction.                                                                                      |
| <b>Grade 1</b>                          | Symptoms, but ambulatory. Restricted in physically strenuous activity, but ambulatory and able to carry out work of a light or sedentary nature (e.g., light housework, office work). |
| <b>Grade 2</b>                          | In bed <50% of the time. Ambulatory and capable of all self-care, but unable to carry out any work activities. Up and about more than 50% of waking hours.                            |
| <b>Grade 3</b>                          | In bed >50% of the time. Capable of only limited self-care, confined to bed or chair more than 50% of waking hours.                                                                   |
| <b>Grade 4</b>                          | 100% bedridden. Completely disabled. Cannot carry on any self-care. Totally confined to bed or chair.                                                                                 |
| <b>Grade 5</b>                          | Dead.                                                                                                                                                                                 |

1058 **Appendix II: Administration of Quality of Life (QOL) Patient Questionnaire Booklet**

1058  
1059  
1060

1061 **Instructions for Study Staff**

1062 The instructions given below are intended to serve as a guide for the administration of the Quality of Life  
1063 (QOL) questionnaire booklet. This booklet contains three QOL assessment tools: FACT-BR,  
1064 Fatigue/Uniscale, and Linear Analogue Self-Assessment (LASA) Scale. The QOL questionnaire should  
1065 be self-administered by the patient.

1066

- 1067 1. Following patient's check-in at clinic, the patient should be taken to a quiet area where he/she may  
1068 complete the questionnaire without interruption. Adequate time should be provided to the patient so  
1069 that the questionnaire can be completed at the beginning of the clinic visit.
- 1070 2. The patient will be given the questionnaire **prior to** being seen by the physician or nursing staff or  
1071 having any tests/procedures done at the clinic visit, as indicated in the protocol.
- 1072 3. The patient should be instructed to read the brief directions at the top of the page. After the patient's  
1073 correct understanding has been confirmed, he/she should be encouraged to complete every item in  
1074 order. Some patients may feel that a given question is not applicable to them and will therefore skip  
1075 the item altogether. **Patients should be encouraged to check the response that is most applicable.**  
1076 If, for example, a patient is not currently receiving any treatment, the patient should check "not at all"  
1077 to the question "I am bothered by side effects of treatment."

1078

- 1079 4. The QOL questionnaire must be completed by the patient alone, without coaching or suggestions as  
1080 to the "correct" answer by health care personnel, relatives, or anyone else.

1081 **OR**

1082 If the patient has experienced cognitive deterioration during treatment, a 'significant other' (e.g., a  
1083 spouse) should complete the QOL questionnaire on behalf of the patient, without coaching or  
1084 suggestions as to the "correct" answer by health care personnel, other relatives, or anyone else. The  
1085 respondent must sign the back of the questionnaire.

1086

- 1087 5. The study staff may provide clarification but should not rephrase questions, suggest answers, or  
1088 discuss answers.
- 1089 6. The study staff will collect the questionnaire as soon as it has been completed, check to see that each  
1090 question has been answered, and remind the patient/respondent to answer any questions that may  
1091 have been missed. If the patient/responder declines to answer some or any of the questions, the study  
1092 staff should enter an explanatory comment on the questionnaire.

1093 *Version Date: 11/03/14*

53

- 1094 7. The questionnaire must be completed in the clinic, **at the beginning of the visit**. The questionnaire  
1095 **may not be taken home nor may it be completed at a later time.** **Note:** Varying the environment in  
1096 which the questionnaire is completed by allowing completion at other times than the time of the clinic  
1097 visit introduces unnecessary variables into the study.
- 1098 8. The information provided by the patient in the completed questionnaire is confidential and should not  
1099 be discussed with, or shown to, anyone who is not a member of the study team.
- 1100
- 1101
- 1102
- 1103



1104 **Appendix III: Patient Quality of Life (QOL) Questionnaire Booklet**

1105  
1106

1107 **You have been given a booklet to complete for this study. The booklet contains some questions**  
1108 **about your quality of life and health status as a patient receiving treatment for cancer. Your**  
1109 **answers will help us to better understand how the treatment you are receiving is affecting the way**  
1110 **you feel and tolerate treatment.**

- 1111
- 1112 1. The booklet contains three sets of questions:
    - 1113 a. FACT-BR (50 questions)
    - 1114 b. Fatigue/Uniscale Assessments (2 questions)
    - 1115 c. Linear Analogue Self-Assessment Scale (4 questions)
  - 1116
  - 1117 2. Directions on how to complete each set of questions are written on the top of each set.
  - 1118
  - 1119 3. Please complete the booklet during your scheduled clinic visit and return it to your nurse or your
  - 1120 physician.

1121  
1122

1123 **Thank you for taking the time to help us.**

1124  
1125  
1126  
1127  
1128  
1129  
1130  
1131  
1132  
1133  
1134  
1135  
1136  
1137  
1138  
1139  
1140  
1141  
1142  
1143  
1144  
1145  
1146  
1147  
1148  
1149  
1150  
1151  
1152  
1153  
1154  
1155  
1156  
1157  
1158  
1159  
1160  
1161  
1162  
1163  
1164  
1165  
1166  
1167  
1168  
1169  
1170  
1171

**Appendix IV: Administration Procedures for the Neurocognitive Tests**

1. Testing should be completed in one session. Test instructions must be followed verbatim with every patient at every study visit. All tests should be completed in black pen. On follow-up visits, it is preferred that patients complete the neurocognitive test battery before seeing the physician since the emotional impact of the results of their follow-up brain scan may influence the patient’s performance on the neurocognitive assessments.
2. Two of the tests to be administered have alternate forms or versions in order to reduce the effects of practice. These versions will be alternated in the testing booklets provided. Always try to use the correct booklet labeled for the patient’s visit number (this number is identified on the title page of each booklet).
3. You may fill the delay interval between COWA and HVLTR Part B (Delayed Recall) with QOL questionnaires.
4. **Originals** of the test booklets should be mailed to NCCTG Operations Office, Attn: QAS for N107C, , NW Clinic 3-24 CC, 200 First Street SW, Rochester, MN 55905.
5. Please keep copies of all completed original test booklets. In the event of questions, contact Dr. Cerhan at the telephone number and email address listed on the Protocol Resources page of the protocol.
6. Patients should **not** be given copies of their tests to avoid learning the material between test administrations.
7. Before dismissing the patient, thank the patient for his/her cooperation. Remind the patient of his/her next appointment and that these tests will be repeated

**Setting up for Neuropsychological Testing**

- Private room
- Door that closes
- Quiet
- Alone with just the patient-- No family members
- May want to hang a sign that says “do not disturb”
- Some tests are timed – it is very important not to be interrupted
- Desk for you both to write on (clipboard works in a pinch)
- Stopwatch
- Black ink pens (one for you and one for the patient)

Version Date: 11/03/14

Testing tips:

- Do not indicate to the patient how well they are doing
- Hide your writing from the patient so they cannot get feedback on how they are performing
- However, it is OK to be generically encouraging (make sure you make the same response whether patient is performing well or not)
- **Please do not assist them in any way if they struggle with a task; we need an accurate view of what they can do themselves**

1172  
1173**Test Instructions***Administer the tests in the following order to every patient at every visit*

1176

**1. HOPKINS VERBAL LEARNING TEST - REVISED (HVLТ-R)**

1177

This test has three parts and six alternate forms:

1178

1179

**1. Part A – Learning Trials:** Complete the three learning trials first

1180

1181

**2. Part B - Delayed Recall:** Complete after a 20-minute delay that includes administration of Trail Making Tests and COWA.

1182

1183

1184

**3. Part C - Delayed Recognition:** Complete immediately after Delayed Recall

1185

1186

**Part A – Learning Trials: Trial 1**

1187

**Examiner:** *“I am going to read a list of words to you. Listen carefully, because when I am through, I’d like you to tell me as many of the words as you can remember. You can tell them to me in any order. Are you ready?”*

1188

1189

1190

1191

1192

- Read the words at the rate of one word every 2 seconds.

*Examiner: “OK. Now tell me as many of those words as you can remember.”*

1193

1194

- Check off the words the patient recalls on the form.
- If a word is said that is not in the list (*for example, “intrusion”*), do not write that word on the form and say nothing to the patient about the word not being on the list.
- There is no time limit for each recall trial. However, if the patient does not produce any words for 10-15 seconds, ask the patient if he/she can remember any more words.
- If not, move on to trial 2.
- Never tell the patient whether a word is correct, and don’t tell them how many words are left on the list (e.g., don’t say “there are three more.”).

1195

1196

1197

1198

1199

1200

**Part A – Learning Trials: Trial 2**

1204

**Examiner:** *“Now we are going to try it again. I am going to read the same list of words to you. Listen carefully, and tell me as many of the words as you can remember, in any order, including the words you told me the first time.”*

1206

1207

Version Date: 11/6/14

53

1208

1209

1210

- Read the words at the rate of one word every 2 seconds.
- Check off the words the patient recalls on the form.
- If a word is said that is not in the list (*for example, “intrusion”*), do not write that word on the form and say nothing to the patient about the word not being on the list.
- There is no time limit for each recall trial. However, if the patient does not produce any words for 10-15 seconds, ask the patient if he/she can remember any more words.
- If not, move on to trial 3.

1211

1212

1213

1214

1215

1216

1217  
1218  
1219

**Part A – Learning Trials: Trial 3**

1220  
1221  
1222

**Examiner:** *“I am going to read the list one more time. As before, I’d like you to tell me as many of the words as you can remember, in any order, including all the words you’ve already told me.”*

1223  
1224

- Read the words at the rate of one word every 2 seconds.

1225

- Check off the words the patient recalls on the form.

1226  
1227

- If a word is said that is not in the list (for example, “intrusion”), do not write that word on the form and say nothing to the patient about the word not being on the list.

1228  
1229

- There is no time limit for each recall trial. However, if the patient does not produce any words for 10-15 seconds, ask the patient if he/she can remember any more words.

1230

- Do not tell the respondent that recall of the words will be tested later.

1231  
1232

- Record the time on the clock that you complete ‘Part A – Free Recall’ (for example, 10:00 am) on the designated space on the HVLT-R form.

1233

1234

**2. TRAIL MAKING TEST [Timed Test]**

1235

1236

**Part A – Sample:** The Sample for Part A must be completed/attempted by each patient at every assessment. Place the Sample A worksheet flat on the table, directly in front of the patient (*the bottom of the worksheet should be approximately six inches from the edge of the table*). Give the patient a black pen and say:

1237

1238

1239

1240

1241

**Examiner:** *“On this page (point) are some numbers. Begin at number 1 (point to 1) and draw a line from 1 to 2 (point to 2), 2 to 3 (point to 3), 3 to 4 (point to 4), and so on, in order, until you reach the end (point to the circle marked END). Draw the lines as fast as you can. Ready, begin.”*

1242

1243

1244

1245

1246

If the patient completes Sample A correctly and in a manner demonstrating that s/he understands what to do, proceed immediately to Test A. If the patient makes a mistake on Sample A, point out the error and explain it.

1247

1248

1249

1250

The following explanations of mistakes serve as illustrations:

1251

- *“This is where you start (point to number 1)”*

1252

*Version Date: 11/03/14*      *“You skipped this circle (point to the circle omitted)”*      53

1253

- *“You should go from number 1 to 2, 2 to 3, and so on, until you reach the circle marked END”*

1254

1255

1256

If it is clear that the patient intended to touch a circle but missed it, do not count it as an omission. Remind the patient, however, to be sure to touch the circles. If the patient still cannot complete Sample A, take his/her hand and guide him/her through the trail using the opposite end of the pen, lightly touching the worksheet to avoid making marks on the copy. Then say:

1257

1258

1259

1260

1261

**Examiner:** *“Remember, begin at number 1 (point to 1) and draw a line from 1 to 2 (point to 2), 2 to 3 (point to 3), 3 to 4 (point to 4) and so on, in order, until you reach the circle marked END (point). Do not skip around, but go from one number to the next in proper order.”*

1262

1263

1264

1265  
1266  
1267  
1268  
1269  
1270  
1271  
1272  
1273  
1274  
1275  
1276  
1277  
1278  
1279  
1280  
1281  
1282  
1283  
1284  
1285  
1286  
1287  
1288  
1289  
1290  
1291  
1292  
1293  
1294  
1295  
1296  
1297  
1298  
1299  
1300  
1301  
1302  
1303  
1304  
1305  
1306  
1307  
1308  
1309  
1310

***Remember to work as fast as you can. Ready, begin.***

If the patient does not succeed, or it becomes evident that s/he cannot do the task, DISCONTINUE testing and indicate the corresponding reason on the Trail Making A & B Scoring (TMABS) sheet. If the patient completes Sample A correctly and appears to understand what to do, proceed immediately to Part A.

**Part A – Test:** After the patient has completed Sample A, place the Part A test worksheet directly in front of the patient and say:

**Examiner:** *“Good! Let’s try the next one. On this page are numbers from 1 to 25. Do this the same way. Begin at number 1 (point) and draw a line from 1 to 2 (point to 2), 2 to 3 (point to 3), 3 to 4 (point to 4) and so on, in order, until you reach the circle marked END (point). Do not skip around, but go from one number to the next in proper order. Remember to work as fast as you can. Ready, begin.”*

- Start timing as soon as the instruction is given to “begin.”
- Watch closely in order to catch any errors as soon as they are made. If the patient makes an error, call it to his/her attention immediately and have him/her proceed from the point the mistake occurred.
- The patient must complete the test in 3 minutes or less
- DO NOT STOP TIMING UNTIL HE/SHE REACHES THE CIRCLE MARKED “END.”
- If the patient does not complete the test within 3 minutes terminate the testing. The test can also be discontinued if the patient is extremely confused and is unable to perform the task. Complete the Trail Making A & B Scoring (TMABS) sheet indicating the reason the test was terminated and the last correct number reached on the test.
- If the patient successfully completes the test, record the time to completion on the Trail Making A & B Scoring (TMABS) sheet in minutes and seconds. Then say, *“That’s fine. Now we’ll try another one.”*

**Part B – Sample:** The Sample for Part B must be completed/attempted by each patient at every assessment. Place the Sample B worksheet flat on the table, directly in front of the patient (the bottom of the worksheet should be approximately six inches from the edge of the table) and say:

**Examiner:** *“On this page (point) are some numbers and letters. Begin at number 1 (point to 1) and draw a line from 1 to A (point), A to 2 (point to 2), 2 to B (point to B), B to 3 (point to 3), 3 to C (point to C) and so on, in order, until you reach the end (point to the circle marked END). Remember, first you have a number (point to 1), then a letter (point to A), then a number (point to 2), then a letter (point to B), and so on. Draw the lines as fast as you can. Ready, begin.”*

If the patient completes Sample B correctly, and in a manner demonstrating that s/he understands what to do, proceed immediately to Part B. If the patient makes a mistake on Sample B, point out the error and explain it.

1311  
1312  
1313  
1314  
1315  
1316  
1317  
1318  
1319  
1320  
1321  
1322  
1323  
1324  
1325  
1326  
1327  
1328  
1329  
1330  
1331  
1332  
1333  
1334  
1335  
1336  
1337  
1338  
1339  
1340  
1341  
1342  
1343  
1344  
1345  
1346  
1347  
1348  
1349  
1350  
1351  
1352  
1353  
1354  
1355  
1356

The following explanations of mistakes serve as illustrations:

- *“You started with the wrong circle. This is where you start (point to number 1)”*
- *“You skipped this circle (point to the circle omitted)”*
- *“You should go from number 1 (point) to A (point), A to 2 (point to 2), 2 to B (point to B), B to 3 (point to 3) and so on, until you reach the circle marked END (point)”*

If it is clear the patient intended to touch a circle but missed it, do not count it as an omission. Remind the patient, however, to be sure to touch the circles. If the patient still cannot complete Sample B, take their hand and guide them through the trail using the opposite end of the pen, lightly touching the worksheet to avoid making marks on the copy. Then say:

**Examiner:** *“Now you try it. Remember, begin at number 1 (point to 1) and draw a line from 1 to A (point to A), A to 2 (point to 2), 2 to B (point to B), B to 3 (point to 3) and so on, in order, until you reach the circle marked END (point). Ready, begin.”*

If the patient does not succeed or it becomes evident that s/he cannot do the task, DISCONTINUE testing and indicate the corresponding reason on the Trail Making A & B Scoring (TMABS) sheet. If the patient completes Sample B correctly and appears to understand what to do, proceed immediately to Part B.

**Part B – Test:** After the patient has completed Sample B, place the Part B Worksheet directly in front of the patient and say:

**Examiner:** *“Good! Let’s try the next one. On this page are both numbers and letters. Do this the same way. Begin at number 1 (point) and draw a line from 1 to A (point to A), A to 2 (point to 2), 2 to B (point to B), B to 3 (point to 3), 3 to C (point to C) and so on, in order, until you reach the circle marked END (point). Remember, first you have a number (point to 1), then a letter (point to A), then a number (point to 2), then a letter (point to B), and so on. Do not skip around, but go from one circle to the next in the proper order. Draw the lines as fast as you can. Ready, begin.”*

- Start timing as soon as the instruction is given to “begin.”
- Watch closely in order to catch any errors as soon as they are made. If the patient makes an error, call it to his/her attention immediately and have him/her proceed from the point the mistake occurred.
- The patient must complete the test in 5 minutes or less.
- **DO NOT STOP TIMING UNTIL HE/SHE REACHES THE CIRCLE MARKED “END.”**
- Record the time to completion on the Trail Making A & B Scoring (TMABS) in minutes and seconds.
- If the patient does not complete the test within 5 minutes terminate the testing. The test can also be discontinued if the patient is extremely confused and is unable to perform the task. Complete the Trail Making A & B Scoring (TMABS) sheet indicating the reason the test was terminated and the last correct number or letter reached on the test.
- If the patient successfully completes the test, record the time to completion on the Trail Making A & B Scoring (TMABS) sheet in minutes and seconds.

Version Date: 11/03/14

53

1357  
1358 3. **CONTROLLED ORAL WORD ASSOCIATION (COWA) [Timed Test]**

1359 This test has three parts (letters).  
1360

1361 **Examiner:** *“I am going to say a letter of the alphabet, and I want you to say as quickly as you*  
1362 *can all of the words that you can think of that begin with that letter. You may say any words at*  
1363 *all, except proper names such as the names of people or places. So you would not say*  
1364 *‘Rochester’ or ‘Robert’. Also, do not use the same word again with a different ending, such as*  
1365 *‘Eat,’ and ‘Eating.’*

1366  
1367 *“For example, if I say ‘s,’ you could say ‘son’, ‘sit,’ ‘shoe,’ or ‘slow.’ Can you think of other*  
1368 *words beginning with the letter ‘s’?”*

1369  
1370 Wait for the patient to give a word. If it is a correct response, say **“good”**, and ask for another  
1371 word beginning with the letter “s.” If a second appropriate word is given, proceed to the test  
1372 itself.

1373  
1374 If the patient gives an inappropriate word on either occasion, correct the patient, and repeat the  
1375 instructions. If the patient then succeeds, proceed to the test.  
1376

1377 If the patient fails to respond, repeat the instructions. If it becomes clear that the patient does not  
1378 understand the instructions or cannot associate, stop the procedure, and indicate the reason(s) on  
1379 the scoring sheet.  
1380

1381 If the patient has succeeded in giving two appropriate words beginning with the demonstration  
1382 letter, say:

1383  
1384 **Examiner:** *“That is fine. Now I am going to give you another letter and again you say all of*  
1385 *the words beginning with that letter that you can think of. Remember, no names of people or*  
1386 *places, just ordinary words. Also, if you should draw a blank, I want you to keep on trying until*  
1387 *the time limit is up and I say STOP.”*

1388  
1389 *“You will have a minute for each letter. The first letter is ‘\_\_\_’ (see scoring sheet).*  
1390

1391 **Allow exactly one minute for each letter**

- 1392 • If the patient discontinues before the end of the time period, encourage him/her to try to  
1393 think of more words.  
1394 *Version Date: 11/05/14* • If he/she is silent for 15 seconds, repeat the basic instruction and the letter (e.g., **“Tell me**  
1395 **all the words you can think of that begin with a “c”**).  
1396 • No extension on the time limit is made in the event that instructions are repeated.  
1397 • Continue the evaluation with the remaining two letters, allowing one minute for each.  
1398

1399 **Recording and Scoring:**

- 1400 • The COWA provides lines on which the patient’s responses can be entered (*e.g., write in*  
1401 *the word that is said by the patient*). If his/her speed of word production is too fast to  
1402 permit verbatim recording, a “+” should be entered to indicate a correct response.  
1403 • Incorrect responses should be struck through with a line. It is usually easiest to record  
1404 each response and incorrect responses can be crossed out later during scoring.  
1405

- 1406 • If the patient provides more responses than there are lines on the record sheet, place  
1407 check marks in the boxes to indicate correct responses only. • Count all the correct  
1408 responses. The number of correct words should be indicated below each column.

1409 Comments on scoring:

- 1411 • Note: It can be helpful for the first several patients and for patients known to be fast with  
1412 their word production to tape record the session for transcription at a later time.
- 1413 • The instructions include a specific prohibition against giving proper names or different  
1414 forms of the same word. Therefore, inflections of the same word (e.g., *eat-eating; mouse-*  
1415 *mouse; loose-loosely; ran-run-runs*) are not considered correct responses.
- 1416 • Patients often give both a verb and a word derived from the verb or adjective (e.g., *fun-*  
1417 *funny; sad-sadness*). These are not considered correct responses. On the other hand, if the  
1418 word refers to a specific object (e.g., *foot-footstool; hang-hanger*), it would be counted as  
1419 a correct answer.
- 1420 • Many words have two or more meanings (e.g., *foot; can; catch; hand*). A repetition of  
1421 the word is acceptable IF the patient definitely indicates the alternative meaning to you.
- 1422 • Slang terms are OK if they are in general use.
- 1423 • Foreign words can be counted as correct if they can be considered part of the lexicon (*for*  
1424 *example, pasta; passé; lasagna*), the criterion being their listing in a standard dictionary.  
1425 All incorrect and repeated responses MUST be crossed out with one single line.  
1426 Additionally, all duplicate entries that have been verified to have different meanings must  
1427 be marked “ok” Refer to the descriptions above for guidelines for acceptability. Add the  
1428 total number of correct responses in each column and input the totals where indicated on  
1429 the COWA worksheet.
- 1430 • If the test is discontinued or omitted, please mark this on the bottom of the test form.

1431

1432 **HOPKINS VERBAL LEARNING TEST - REVISED (HVLTR)**

1433

1434 **Part B – Delayed Recall**

1435

1436 ***DO NOT READ THE WORD LIST AGAIN.***

1437 Record the time on the clock that you *start* ‘Part B – Delayed Recall’ (for example, 10:20 am) on  
1438 the designated space on the HVLTR form.

1439 Administer ‘Part B – Delayed Recall’ after completing all Trail Making Tests and the COWA.

1440 *Version D* There should be at least 20 minutes between ‘Part A’ and ‘Part B’ of the HVLTR. If the time is  
1441 too short, allow the patients to complete a questionnaire.

1442

1443 **Examiner: “Do you remember that list of words you tried to learn before? Tell me as many of  
1444 those words as you can remember.”**

- 1445 • Check the box on the corresponding line of the HVLTR worksheet for each word the  
1446 patient accurately recalls.
- 1447 • If a word is said that is not in the list (for example, “intrusion”), do not write that word  
1448 on the form and say nothing to the patient about the word not being on the list.



- 1451
- 1452
- 1453
- There is no time limit for each recall trial. However, if the patient does not produce any words for 10-15 seconds, ask the patient if he/she can remember any more words.
  - If not, record the number of words that were correctly recalled on the summary form.

1454

1455

**Part C – Delayed Recognition**

1456

1457 **Examiner:** *“Now I’m going to read a longer list of words to you. Some of them are words from*  
 1458 *the original list, and some are not. After I read each word, I’d like you to say “Yes” if it was on*  
 1459 *the original list or “No” if it was not. Was [word] on the list?”*

1460

1461

1462

1463

1464

1465

1466

1467

1468

1469

1470

1471

- Read the words from the top of the columns down.
- Check either the “Y” (Yes) or “N” (No) box next to each word to indicate the patient’s response.
- Guessing is allowed.
- If the test is discontinued or omitted, please mark this on the bottom of the test form and indicate the reason.
- The score for this portion of the HVLT-R is the number of list words (i.e., words that in CAPS) correctly identified (“yes” response) minus the number of non-list words (i.e., words in lower case) incorrectly identified (“yes” response). Therefore, the actual score can range from –12 (*no list words identified and all non-list words identified*) to +12 (*all list words identified and no non-list words identified*).

1472  
1473  
1474  
1475  
1476  
1477  
1478  
1479  
1480  
1481  
1482  
1483  
1484  
1485  
1486  
1487  
1488  
1489  
1490  
1491  
1492  
1493  
1494  
1495  
1496  
1497

**Appendix V: Patient and Examiner Neurocognitive Testing Questionnaire Booklet**

Page 1 of 1

**This booklet is to be completed by the certified test administrator on behalf of the patient. This booklet also contains two tests (Trail Making Test A and B), which will be administered by the certified test administrator to the patient during the neurocognitive evaluations.**

1. The tests and battery format that will be done in this booklet includes the following and will take approximately 20 to 30 minutes to complete:
  - a. *Memory* (4.5 minutes): Hopkins Verbal Learning Test (HVLТ) (Brandt 1991).
  - b. *Verbal Fluency* (3.5 minutes): Controlled Oral Word Association Test from the Multilingual Aphasia Examination (COWAT) (Benton and Hamsher 1978).
  - c. *Visual Attention* (5 minutes): Trail Making Test A (Reitan 1958)
  - d. *Executive Function* (5 minutes): Trail Making Test B(Reitan 1958)
  - e. *Delayed Memory* (1.5 minutes): Recall and Recognition of Word List encoded from the HVLТ (Brandt 1991).
2. Directions on how to complete these tests is provided in the Administration Procedures for the Neurocognitive Test Battery (see Forms Packet).
3. The certified test administrator will provide verbal instruction to the patient for completing the patient completed portion of the neurocognitive evaluations (i.e., Trail Making Test A and B).

**Thank you for taking the time to help us.**

1498 **Appendix VI: Neurocognitive Testing Submission Fax Form**

1499  
1500  
1501  
1502  
1503

Fax completed form to:  
QAS for N107C  
Telefax (507) 266-7240

1504  
1505  
1506  
1507  
1508  
1509  
1510

From: \_\_\_\_\_

1511  
1512

Date: \_\_\_\_\_

1513  
1514  
1515

Re: Neurocognitive Evaluations Booklet Submission

1516  
1517  
1518

**Attention: 2 Completed Neurocognitive Evaluations booklets** (completed Patient and Examiner Questionnaire Booklets) have been sent to you via surface mail, as of \_\_\_\_\_ (date).

|                            |  |
|----------------------------|--|
| Contact Information:       |  |
| Person administering test: |  |
| Name of site:              |  |
| Phone:                     |  |
| Email:                     |  |
| Patient's study ID #:      |  |

1519 **Appendix VII: Radiation Therapy Quality Control Guidelines for SRS and WBRT**

1520  
1521 **SRS Guidelines**

1522 **1. SRS Compliance Criteria**

1523 A final review of the stereotactic radiotherapy treatment will be performed by the community  
1524 NCCTG Radiation Oncology co-Chair and the study chair. The review process will include all  
1525 Response Review Materials as outlined in [Section 18.0](#). Based on the evaluation and verification of  
1526 data submitted, the Quality Assurance scores will be assigned to each case.

1531 **2. SRS Target Coverage QA**

1532 The ‘target’ as outlined below is by definition the CTV (regarding SRS to surgical cavity, target is  
1533 defined as CTV2).

1534 95% of the prescribed dose should completely encompass the target. For example if 18 Gy is  
1535 prescribed to the 50 % isodose then the minimum dose to the target should be 17.1 Gy.

1536 **Minor Deviation:** 90% of the prescribed dose completely encompasses the target.

1537 **Major Deviation:** < 90% of the prescribed dose completely encompasses the target.

1540 **3. SRS Dose prescription**

1541 If the prescribed dose is not within 90% of the dose corresponding with the maximum dimension of  
1542 the target as outlined in the protocol is a Major Deviation.

1544 **4. SRS Dose Conformity QA**

1545 **For lesions 5 mm or greater,** the ratio of the prescription isodose volume to the target volume  
1546 (CTV) should be between 1.0 and 2.0.

1547 **Minor Deviation:** If the ratio is  $\geq 0.9$  but  $< 1.0$  or  $> 2.0$  but  $\leq 3.0$ .

1548 **Major Deviation:** If the ratio is above 3.0 it is a major deviation.

1549 **For lesions less than 5 mm,** a ratio up to 3.0 is acceptable.

1550 **Minor Deviation:** If the ratio is  $> 3.0$  but  $\leq 3.5$ .

1551 **Major Deviation:** If the ratio is above 3.5.

1554 **5. SRS Normal Tissue/Critical Structures**

1555 **Minor Deviation:** If maximum point dose to the optic chiasm is  $> 9$  Gy but  $< 12$  Gy.

1556 If 1cc of the brain stem is  $> 12$  Gy but  $< 14$  Gy.

1557 **Major Deviation:** If maximum point dose to the optic chiasm is 12 Gy or greater.

1558 If 1cc of the brain stem is 14 Gy or greater.

1560 *Version Date: 11/03/14*

53

1561  
1562 **WBRT Guidelines**

1563 **1. Target Volume Coverage**

1564 **No deviation:** Coverage  $+ < 1$  cm of specified.

1565 **Minor deviation:** Coverage  $+ > 1$  to 2 cm of specified or failure to cover tumor volume  $+ > \frac{1}{2}$   
1566 specified margin.

1567 **Major deviation:**  $> 2$  cm of specified or failure to cover the target (i.e. brain) as defined in the  
1568 protocol.

1569  
1570  
1571  
1572  
1573  
1574  
1575  
1576  
1577  
1578  
1579  
1580  
1581  
1582  
1583  
1584  
1585  
1586  
1587  
1588  
1589  
1590  
1591  
1592  
1593  
1594  
1595  
1596  
1597  
1598  
1599  
1600  
1601  
1602  
1603  
1604  
1605  
1606  
1607

## 2. Isodoses

Initial volume isodose plots are required on a minimum of three contours; one at central axis (CA), one superior to CA (2 cm below the superior field edge) and one inferior to CA (2 cm above the inferior field edge).

**No deviation:** Isodoses submitted as required, and inhomogeneity across the target volume shall be no greater than + 10%.

**Minor deviation\*:** Isodose information incomplete or inhomogeneity across the target volume >10 but < 15%.

**Major deviation\*:** No isodoses submitted or inhomogeneity across the target volume > 15%.

\* Deviations would occur only if isodose information is incomplete or not submitted after there has been a request to submit complete isodose information.

## 3. Normal Tissues

Normal structures are only to be included within the radiation field in as much as this is necessary to treat the primary tumor volume. A minor deviation will result when normal structures are unnecessarily included, but this is not felt to result in unacceptable toxicity that would interfere with the scientific aims of the protocol. A major deviation will result when normal structures are unnecessarily included in the radiation therapy field and such inclusion is felt likely to result in a major increase in toxicity which would potentially compromise the scientific goals of the study.

## 4. Other Parameters

Dose per fraction, total dose, overall treatment time and portal films unless there are extraordinary circumstances such as significant patient illness requiring hospitalization, etc.

**No deviation:** +/- < 5% of protocol specification.

**Minor deviation:** +/- > 5% to 10% of protocol specification.

**Major deviation:** +/- > 10% of protocol specification or incomplete data (i.e. no portal or sim films, etc.) available for review (after additional request has been made).

## 5. Scoring of Deviations

Any individual minor deviation will result in an overall score of minor deviation; any major deviation will result in an overall score of a major deviation. Multiple minor deviations will not add up to a major deviation.
