# Supplementary material
Source: PubMed Central journal article supplement (PMC9585461)
Supplement: jamaoncol-e225049-s002.pdf [file jamaoncol-e225049-s002.pdf]

## Supplemental Online Content

Palmer JD, Klamer BG, Ballman KV, et al. Association of long-term outcomes with stereotactic radiosurgery vs whole-brain radiotherapy for resected brain metastasis: a secondary analysis of N107C/CEC.3 (Alliance for Clinical Trials in Oncology/Canadian Cancer Trials Group) randomized clinical trial. *JAMA Oncol*. Published online October 20, 2022. doi:10.1001/jamaoncol.2022.5049

**eTable 1.** Intracranial control rates based on treatment arm

**eTable 2.** Adverse Events Summary for Long-term Survivors

**eTable 3.** Changes in Quality of Life from baseline for long-term survivors comparing SRS vs WBRT

**eFigure 1.** Consort Diagram

**eFigure 2.** Number of Patients With a 3 SD. Decline in 3 or More Cognitive Tests Based on Treatment Arm

**eFigure 3A.** Categorical Change in QOL From Baseline Comparing SRS vs WBRT

**eFigure 3B.** Categorical Change From Baseline for QOL and Functional Independence Comparing SRS vs WBRT

This supplemental material has been provided by the authors to give readers additional information about their work.

**eTable 1. Intracranial control rates based on treatment arm**

|                                                     | Number of patients without tumor failure/Total (%) |               | Difference (95% CI)  |  |
|-----------------------------------------------------|----------------------------------------------------|---------------|----------------------|--|
|                                                     | <b>SRS</b>                                         | <b>WBRT</b>   |                      |  |
| <b>Surgical Bed Control</b>                         |                                                    |               |                      |  |
| <b>at 3 months</b>                                  | 26/27 (96.3%)                                      | 27/27 (100%)  | -3.7 (-14.5, 7.1)    |  |
| <b>at 6 months</b>                                  | 22/27 (81.5%)                                      | 25/27 (92.6%) | -11.1 (-32.5, 10.3)  |  |
| <b>at 12 months</b>                                 | 13/27 (48.1%)                                      | 23/27 (85.2%) | -37 (-63.9, -10.2)   |  |
| <b>Local Control of Unresected Brain Metastases</b> |                                                    |               |                      |  |
| <b>at 3 months</b>                                  | 24/27 (88.9%)                                      | 27/27 (100%)  | -11.1 (-26.7, 4.5)   |  |
| <b>at 6 months</b>                                  | 22/27 (81.5%)                                      | 26/27 (96.3%) | -14.8 (-34.8, 5.2)   |  |
| <b>at 12 months</b>                                 | 19/27 (70.4%)                                      | 24/26 (92.3%) | -21.9 (-45.8, 1.9)   |  |
| <b>Distant Brain Control</b>                        |                                                    |               |                      |  |
| <b>at 3 months</b>                                  | 25/27 (92.6%)                                      | 27/27 (100%)  | -7.4 (-21, 6.2)      |  |
| <b>at 6 months</b>                                  | 21/27 (77.8%)                                      | 27/27 (100%)  | -22.2 (-41.6, -2.8)  |  |
| <b>at 12 months</b>                                 | 17/27 (63%)                                        | 24/26 (92.3%) | -29.3 (-54, -4.7)    |  |
| <b>Total Intracranial Brain Control</b>             |                                                    |               |                      |  |
| <b>at 3 months</b>                                  | 24/27 (88.9%)                                      | 27/27 (100%)  | -11.1 (-26.7, 4.5)   |  |
| <b>at 6 months</b>                                  | 19/27 (70.4%)                                      | 25/27 (92.6%) | -22.2 (-45.8, 1.3)   |  |
| <b>at 12 months</b>                                 | 11/27 (40.7%)                                      | 22/27 (81.5%) | -40.7 (-68.1, -13.4) |  |

**eTable 2. Adverse Events Summary for Long-term survivors**

| ARM          | Any attribution |              |              |              |            |              |
|--------------|-----------------|--------------|--------------|--------------|------------|--------------|
|              | Grade 0         | Grade 1      | Grade 2      | Grade 3      | Grade 4    | Total        |
| WBRT         | 1<br>3.70%      | 9<br>33.33%  | 9<br>33.33%  | 8<br>29.63%  | 0<br>0.00% | 27<br>50.00% |
| SRS          | 5<br>18.52%     | 8<br>29.63%  | 9<br>33.33%  | 4<br>14.81%  | 1<br>3.70% | 27<br>50.00% |
| <b>Total</b> | 6<br>11.11%     | 17<br>31.48% | 18<br>33.33% | 12<br>22.22% | 1<br>1.85% | 54<br>100.0% |

| WBRT arm              | Any attribution |       |
|-----------------------|-----------------|-------|
|                       | Grade 3         | Total |
| Hearing impaired      | 13              | 13    |
| Anorexia              | 2               | 2     |
| Thromboembolic event  | 2               | 2     |
| Weight loss           | 2               | 2     |
| Cognitive disturbance | 1               | 1     |
| Myalgia               | 1               | 1     |
| Tooth infection       | 1               | 1     |
| <b>Total</b>          | 22              | 22    |

| <b>SRS arm</b>                                           | <b>Any attribution</b> |                |              |
|----------------------------------------------------------|------------------------|----------------|--------------|
|                                                          | <b>Grade 3</b>         | <b>Grade 4</b> | <b>Total</b> |
| <b>Frequency</b>                                         |                        |                |              |
| <b>Central nervous system necrosis</b>                   | 3                      | 0              | 3            |
| <b>Bone pain</b>                                         | 1                      | 0              | 1            |
| <b>Dyspnea</b>                                           | 1                      | 0              | 1            |
| <b>Fatigue</b>                                           | 1                      | 0              | 1            |
| <b>Hearing impaired</b>                                  | 1                      | 0              | 1            |
| <b>Neutrophil count decreased</b>                        | 0                      | 1              | 1            |
| <b>Otitis media</b>                                      | 1                      | 0              | 1            |
| <b>Reversible posterior leukoencephalopathy syndrome</b> | 1                      | 0              | 1            |
| <b>Weight loss</b>                                       | 1                      | 0              | 1            |
| <b>Total</b>                                             | 10                     | 1              | 11           |

**eTable 3. Changes in Quality of Life from baseline for long-term survivors comparing SRS vs WBRT**

| <b>FACT-BR Physical Well-Being Subscore<br/>Change from Baseline</b> |                       |                        |                   |                         |                     |
|----------------------------------------------------------------------|-----------------------|------------------------|-------------------|-------------------------|---------------------|
|                                                                      | <b>SRS<br/>(N=27)</b> | <b>WBRT<br/>(N=27)</b> |                   | <b>Total<br/>(N=54)</b> | <b>p value</b>      |
| <b>FACT-BR Physical Well-Being Subscore: 3-Months</b>                |                       |                        |                   |                         |                     |
| N                                                                    | 27                    | 25                     |                   | 52                      |                     |
| Mean (SD)                                                            | -0.1 (26.1)           | -20.1 (20.9)           |                   | -9.8 (25.6)             |                     |
| Median                                                               | 0.0                   | -17.9                  |                   | -7.1                    |                     |
| Q1, Q3                                                               | -14.3, 10.7           | -35.7, -3.0            |                   | -32.1, 3.6              |                     |
| Range                                                                | (-50.0-57.1)          | (-60.7-21.4)           |                   | (-60.7-57.1)            |                     |
| <b>Difference (95% CI)</b>                                           |                       |                        | 20 (7.2, 32.8)    |                         | 0.0036 <sup>1</sup> |
| <b>FACT-BR Physical Well-Being Subscore: 6-Months</b>                |                       |                        |                   |                         |                     |
| N                                                                    | 26                    | 25                     |                   | 51                      |                     |
| Mean (SD)                                                            | -1.2 (24.0)           | -9.7 (20.5)            |                   | -5.4 (22.5)             |                     |
| Median                                                               | 1.8                   | -3.6                   |                   | -3.6                    |                     |
| Q1, Q3                                                               | -10.7, 10.7           | -25.0, 4.2             |                   | -25.0, 7.1              |                     |
| Range                                                                | (-46.4-60.7)          | (-46.4-26.8)           |                   | (-46.4-60.7)            |                     |
| <b>Difference (95% CI)</b>                                           |                       |                        | 8.5 (-3.7, 20.7)  |                         | 0.1791 <sup>1</sup> |
| <b>FACT-BR Physical Well-Being Subscore: 9-Months</b>                |                       |                        |                   |                         |                     |
| N                                                                    | 25                    | 26                     |                   | 51                      |                     |
| Mean (SD)                                                            | -9.4 (25.5)           | -6.1 (19.0)            |                   | -7.7 (22.3)             |                     |
| Median                                                               | -17.9                 | -3.6                   |                   | -7.1                    |                     |
| Q1, Q3                                                               | -21.4, 3.6            | -21.4, 3.6             |                   | -21.4, 3.6              |                     |
| Range                                                                | (-67.9-64.3)          | (-46.4-29.2)           |                   | (-67.9-64.3)            |                     |
| <b>Difference (95% CI)</b>                                           |                       |                        | -3.3 (-15.7, 9.1) |                         | 0.6076 <sup>1</sup> |
| <b>FACT-BR Physical Well-Being Subscore: 12-Months</b>               |                       |                        |                   |                         |                     |
| N                                                                    | 25                    | 22                     |                   | 47                      |                     |
| Mean (SD)                                                            | -9.7 (12.5)           | -1.8 (19.0)            |                   | -6.0 (16.2)             |                     |
| Median                                                               | -10.7                 | -1.8                   |                   | -7.1                    |                     |
| Q1, Q3                                                               | -14.3, 0.0            | -14.3, 14.3            |                   | -14.3, 3.6              |                     |
| Range                                                                | (-35.7-10.7)          | (-35.7-35.1)           |                   | (-35.7-35.1)            |                     |
| <b>Difference (95% CI)</b>                                           |                       |                        | -7.9 (-17.2, 1.4) |                         | 0.1051 <sup>1</sup> |
| (report generated on 07MAR2017)                                      |                       |                        |                   |                         |                     |
| <sup>1</sup> Unequal Variance T-Test                                 |                       |                        |                   |                         |                     |

| FACT-BR Physical Well-Being Subscore<br>Categorical Change from Baseline   |               |                |                     |                 |                     |
|----------------------------------------------------------------------------|---------------|----------------|---------------------|-----------------|---------------------|
|                                                                            | SRS<br>(N=27) | WBRT<br>(N=27) |                     | Total<br>(N=54) | p value             |
| <b>FACT-BR Physical Well-Being Subscore: 3-Months</b>                      |               |                |                     |                 | 0.0245 <sup>1</sup> |
| Missing                                                                    | 0             | 1              |                     | 1               |                     |
| At least 10% drop                                                          | 9 (33.3%)     | 17 (65.4%)     |                     | 26 (49.1%)      |                     |
| Stable                                                                     | 11 (40.7%)    | 8 (30.8%)      |                     | 19 (35.8%)      |                     |
| At least 10% improvement                                                   | 7 (25.9%)     | 1 (3.8%)       |                     | 8 (15.1%)       |                     |
| <b>Difference (95% CI) *</b>                                               |               |                | 22.1 (9.3, 34.8)    |                 |                     |
| <b>FACT-BR Physical Well-Being Subscore: 6-Months</b>                      |               |                |                     |                 | 0.2597 <sup>1</sup> |
| Missing                                                                    | 1             | 1              |                     | 2               |                     |
| At least 10% drop                                                          | 7 (26.9%)     | 12 (46.2%)     |                     | 19 (36.5%)      |                     |
| Stable                                                                     | 11 (42.3%)    | 10 (38.5%)     |                     | 21 (40.4%)      |                     |
| At least 10% improvement                                                   | 8 (30.8%)     | 4 (15.4%)      |                     | 12 (23.1%)      |                     |
| <b>Difference (95% CI) *</b>                                               |               |                | 15.4 (-0.2, 31)     |                 |                     |
| <b>FACT-BR Physical Well-Being Subscore: 9-Months</b>                      |               |                |                     |                 | 0.1160 <sup>1</sup> |
| Missing                                                                    | 2             | 0              |                     | 2               |                     |
| At least 10% drop                                                          | 16 (64.0%)    | 10 (37.0%)     |                     | 26 (50.0%)      |                     |
| Stable                                                                     | 5 (20.0%)     | 12 (44.4%)     |                     | 17 (32.7%)      |                     |
| At least 10% improvement                                                   | 4 (16.0%)     | 5 (18.5%)      |                     | 9 (17.3%)       |                     |
| <b>Difference (95% CI) *</b>                                               |               |                | -2.5 (-16.8, 11.7)  |                 |                     |
| <b>FACT-BR Physical Well-Being Subscore: 12-Months</b>                     |               |                |                     |                 | 0.1035 <sup>1</sup> |
| Missing                                                                    | 2             | 4              |                     | 6               |                     |
| At least 10% drop                                                          | 13 (52.0%)    | 11 (47.8%)     |                     | 24 (50.0%)      |                     |
| Stable                                                                     | 10 (40.0%)    | 5 (21.7%)      |                     | 15 (31.3%)      |                     |
| At least 10% improvement                                                   | 2 (8.0%)      | 7 (30.4%)      |                     | 9 (18.8%)       |                     |
| <b>Difference (95% CI) *</b>                                               |               |                | -22.4 (-36.7, -8.2) |                 |                     |
| (report generated on 07MAR2017)                                            |               |                |                     |                 |                     |
| <sup>1</sup> Chi-Square                                                    |               |                |                     |                 |                     |
| * difference in proportion in the last category (At least 10% improvement) |               |                |                     |                 |                     |

**FACT-BR Social/Family Well-Being Subscore  
Change from Baseline**

|                                                             | SRS<br>(N=27) | WBRT<br>(N=27) |                   | Total<br>(N=54) | p value             |
|-------------------------------------------------------------|---------------|----------------|-------------------|-----------------|---------------------|
| <b>FACT-BR Social/Family Well-Being Subscore: 3-Months</b>  |               |                |                   |                 | 0.8705 <sup>1</sup> |
| N                                                           | 27            | 25             |                   | 52              |                     |
| Mean (SD)                                                   | -2.2 (15.4)   | -1.4 (16.0)    |                   | -1.8 (15.6)     |                     |
| Median                                                      | -3.6          | -3.6           |                   | -3.6            |                     |
| Q1, Q3                                                      | -14.3, 7.1    | -10.7, 10.7    |                   | -11.9, 7.7      |                     |
| Range                                                       | (-28.6-33.3)  | (-29.2-27.7)   |                   | (-29.2-33.3)    |                     |
| <b>Difference (95% CI)</b>                                  |               |                | -0.8 (-9.3, 7.7)  |                 |                     |
| <b>FACT-BR Social/Family Well-Being Subscore: 6-Months</b>  |               |                |                   |                 | 0.8243 <sup>1</sup> |
| N                                                           | 26            | 25             |                   | 51              |                     |
| Mean (SD)                                                   | -1.4 (16.2)   | -0.3 (19.8)    |                   | -0.8 (17.9)     |                     |
| Median                                                      | -1.8          | 0.0            |                   | 0.0             |                     |
| Q1, Q3                                                      | -14.3, 10.7   | -12.5, 10.7    |                   | -14.3, 10.7     |                     |
| Range                                                       | (-28.6-28.6)  | (-42.9-35.7)   |                   | (-42.9-35.7)    |                     |
| <b>Difference (95% CI)</b>                                  |               |                | -1.1 (-11.1, 8.9) |                 |                     |
| <b>FACT-BR Social/Family Well-Being Subscore: 9-Months</b>  |               |                |                   |                 | 0.8113 <sup>1</sup> |
| N                                                           | 25            | 26             |                   | 51              |                     |
| Mean (SD)                                                   | -3.0 (19.2)   | -1.8 (17.3)    |                   | -2.4 (18.1)     |                     |
| Median                                                      | -4.2          | -3.6           |                   | -3.6            |                     |
| Q1, Q3                                                      | -10.7, 10.7   | -16.7, 8.3     |                   | -14.3, 10.7     |                     |
| Range                                                       | (-53.6-30.4)  | (-40.0-34.5)   |                   | (-53.6-34.5)    |                     |
| <b>Difference (95% CI)</b>                                  |               |                | -1.2 (-11.2, 8.8) |                 |                     |
| <b>FACT-BR Social/Family Well-Being Subscore: 12-Months</b> |               |                |                   |                 | 0.3885 <sup>1</sup> |
| N                                                           | 25            | 22             |                   | 47              |                     |
| Mean (SD)                                                   | -7.2 (13.7)   | -3.1 (18.2)    |                   | -5.3 (15.9)     |                     |
| Median                                                      | -7.1          | -5.7           |                   | -7.1            |                     |
| Q1, Q3                                                      | -14.3, 0.0    | -17.3, 5.8     |                   | -17.3, 3.6      |                     |
| Range                                                       | (-33.3-28.6)  | (-28.6-41.7)   |                   | (-33.3-41.7)    |                     |
| <b>Difference (95% CI)</b>                                  |               |                | -4.1 (-13.4, 5.2) |                 |                     |

(report generated on 07MAR2017)

<sup>1</sup>Unequal Variance T-Test

| FACT-BR Social/Family Well-Being Subscore<br>Categorical Change from Baseline |               |                |                     |                 |                     |
|-------------------------------------------------------------------------------|---------------|----------------|---------------------|-----------------|---------------------|
|                                                                               | SRS<br>(N=27) | WBRT<br>(N=27) |                     | Total<br>(N=54) | p value             |
| <b>FACT-BR Social/Family Well-Being Subscore: 3-Months</b>                    |               |                |                     |                 | 0.6742 <sup>1</sup> |
| Missing                                                                       | 0             | 1              |                     | 1               |                     |
| At least 10% drop                                                             | 11 (40.7%)    | 8 (30.8%)      |                     | 19 (35.8%)      |                     |
| Stable                                                                        | 11 (40.7%)    | 11 (42.3%)     |                     | 22 (41.5%)      |                     |
| At least 10% improvement                                                      | 5 (18.5%)     | 7 (26.9%)      |                     | 12 (22.6%)      |                     |
| <b>Difference (95% CI)*</b>                                                   |               |                | -8.4 (-24.1, 7.3)   |                 |                     |
| <b>FACT-BR Social/Family Well-Being Subscore: 6-Months</b>                    |               |                |                     |                 | 0.6227 <sup>1</sup> |
| Missing                                                                       | 1             | 1              |                     | 2               |                     |
| At least 10% drop                                                             | 11 (42.3%)    | 8 (30.8%)      |                     | 19 (36.5%)      |                     |
| Stable                                                                        | 8 (30.8%)     | 11 (42.3%)     |                     | 19 (36.5%)      |                     |
| At least 10% improvement                                                      | 7 (26.9%)     | 7 (26.9%)      |                     | 14 (26.9%)      |                     |
| <b>Difference (95% CI)*</b>                                                   |               |                | 0 (-16.7, 16.7)     |                 |                     |
| <b>FACT-BR Social/Family Well-Being Subscore: 9-Months</b>                    |               |                |                     |                 | 0.8865 <sup>1</sup> |
| Missing                                                                       | 2             | 0              |                     | 2               |                     |
| At least 10% drop                                                             | 8 (32.0%)     | 9 (33.3%)      |                     | 17 (32.7%)      |                     |
| Stable                                                                        | 10 (40.0%)    | 12 (44.4%)     |                     | 22 (42.3%)      |                     |
| At least 10% improvement                                                      | 7 (28.0%)     | 6 (22.2%)      |                     | 13 (25.0%)      |                     |
| <b>Difference (95% CI)*</b>                                                   |               |                | 5.8 (-10.5, 22.1)   |                 |                     |
| <b>FACT-BR Social/Family Well-Being Subscore: 12-Months</b>                   |               |                |                     |                 | 0.2350 <sup>1</sup> |
| Missing                                                                       | 2             | 4              |                     | 6               |                     |
| At least 10% drop                                                             | 9 (36.0%)     | 10 (43.5%)     |                     | 19 (39.6%)      |                     |
| Stable                                                                        | 14 (56.0%)    | 8 (34.8%)      |                     | 22 (45.8%)      |                     |
| At least 10% improvement                                                      | 2 (8.0%)      | 5 (21.7%)      |                     | 7 (14.6%)       |                     |
| <b>Difference (95% CI)*</b>                                                   |               |                | -13.7 (-26.9, -0.6) |                 |                     |

(report generated on 07MAR2017)

<sup>1</sup>Chi-Square

\* difference in proportion in the last category (At least 10% improvement)



**FACT-BR Emotional Well-Being Subscore  
Change from Baseline**

|                                                         | SRS<br>(N=27) | WBRT<br>(N=27) |                     | Total<br>(N=54) | p value             |
|---------------------------------------------------------|---------------|----------------|---------------------|-----------------|---------------------|
| <b>FACT-BR Emotional Well-Being Subscore: 3-Months</b>  |               |                |                     |                 |                     |
| N                                                       | 25            | 27             |                     | 52              | 0.7085 <sup>1</sup> |
| Mean (SD)                                               | -1.5 (16.4)   | 0.6 (23.2)     |                     | -0.4 (20.1)     |                     |
| Median                                                  | 0.0           | 12.5           |                     | 0.0             |                     |
| Q1, Q3                                                  | -8.3, 9.2     | -12.5, 16.7    |                     | -8.3, 16.7      |                     |
| Range                                                   | (-41.7-29.2)  | (-58.3-25.0)   |                     | (-58.3-29.2)    |                     |
| <b>Difference (95% CI)</b>                              |               |                | -2.1 (-13, 8.8)     |                 |                     |
| <b>FACT-BR Emotional Well-Being Subscore: 6-Months</b>  |               |                |                     |                 |                     |
| N                                                       | 26            | 26             |                     | 52              | 0.0223 <sup>1</sup> |
| Mean (SD)                                               | -0.1 (14.0)   | 10.7 (18.7)    |                     | 5.3 (17.2)      |                     |
| Median                                                  | 0.0           | 12.5           |                     | 6.3             |                     |
| Q1, Q3                                                  | -8.3, 12.5    | 0.0, 20.8      |                     | -5.8, 16.7      |                     |
| Range                                                   | (-33.3-20.8)  | (-41.7-45.8)   |                     | (-41.7-45.8)    |                     |
| <b>Difference (95% CI)</b>                              |               |                | -10.8 (-19.8, -1.8) |                 |                     |
| <b>FACT-BR Emotional Well-Being Subscore: 9-Months</b>  |               |                |                     |                 |                     |
| N                                                       | 24            | 27             |                     | 51              | 0.0020 <sup>1</sup> |
| Mean (SD)                                               | -4.5 (19.1)   | 12.8 (18.6)    |                     | 4.7 (20.6)      |                     |
| Median                                                  | 0.0           | 12.5           |                     | 4.2             |                     |
| Q1, Q3                                                  | -12.5, 4.2    | 0.0, 20.8      |                     | -8.3, 16.7      |                     |
| Range                                                   | (-75.0-29.2)  | (-20.8-50.0)   |                     | (-75.0-50.0)    |                     |
| <b>Difference (95% CI)</b>                              |               |                | -17.3 (-27.7, -6.9) |                 |                     |
| <b>FACT-BR Emotional Well-Being Subscore: 12-Months</b> |               |                |                     |                 |                     |
| N                                                       | 24            | 22             |                     | 46              | 0.0130 <sup>1</sup> |
| Mean (SD)                                               | -6.0 (15.4)   | 6.6 (17.6)     |                     | 0.0 (17.5)      |                     |
| Median                                                  | -6.3          | 8.3            |                     | 0.0             |                     |
| Q1, Q3                                                  | -16.7, 8.3    | 0.0, 12.5      |                     | -15.8, 8.3      |                     |
| Range                                                   | (-37.5-20.8)  | (-33.3-45.8)   |                     | (-37.5-45.8)    |                     |
| <b>Difference (95% CI)</b>                              |               |                | -12.6 (-22.2, -3)   |                 |                     |

(report generated on 07MAR2017)

<sup>1</sup>Unequal Variance T-Test

**FACT-BR Emotional Well-Being Subscore  
Categorical Change from Baseline**

|                                                         | SRS<br>(N=27) | WBRT<br>(N=27) |                      | Total<br>(N=54) | p value             |
|---------------------------------------------------------|---------------|----------------|----------------------|-----------------|---------------------|
| <b>FACT-BR Emotional Well-Being Subscore: 3-Months</b>  |               |                |                      |                 | 0.0396 <sup>1</sup> |
| Missing                                                 | 1             | 0              |                      | 1               |                     |
| At least 10% drop                                       | 6 (23.1%)     | 7 (25.9%)      |                      | 13 (24.5%)      |                     |
| Stable                                                  | 14 (53.8%)    | 6 (22.2%)      |                      | 20 (37.7%)      |                     |
| At least 10% improvement                                | 6 (23.1%)     | 14 (51.9%)     |                      | 20 (37.7%)      |                     |
| <b>Difference (95% CI)*</b>                             |               |                | -28.8 (-46.2, -11.3) |                 |                     |
| <b>FACT-BR Emotional Well-Being Subscore: 6-Months</b>  |               |                |                      |                 | 0.0408 <sup>1</sup> |
| Missing                                                 | 0             | 1              |                      | 1               |                     |
| At least 10% drop                                       | 7 (25.9%)     | 2 (7.7%)       |                      | 9 (17.0%)       |                     |
| Stable                                                  | 13 (48.1%)    | 9 (34.6%)      |                      | 22 (41.5%)      |                     |
| At least 10% improvement                                | 7 (25.9%)     | 15 (57.7%)     |                      | 22 (41.5%)      |                     |
| <b>Difference (95% CI)*</b>                             |               |                | -31.8 (-49.4, -14.2) |                 |                     |
| <b>FACT-BR Emotional Well-Being Subscore: 9-Months</b>  |               |                |                      |                 | 0.0014 <sup>1</sup> |
| Missing                                                 | 2             | 0              |                      | 2               |                     |
| At least 10% drop                                       | 8 (32.0%)     | 2 (7.4%)       |                      | 10 (19.2%)      |                     |
| Stable                                                  | 15 (60.0%)    | 11 (40.7%)     |                      | 26 (50.0%)      |                     |
| At least 10% improvement                                | 2 (8.0%)      | 14 (51.9%)     |                      | 16 (30.8%)      |                     |
| <b>Difference (95% CI)*</b>                             |               |                | -43.9 (-59, -28.7)   |                 |                     |
| <b>FACT-BR Emotional Well-Being Subscore: 12-Months</b> |               |                |                      |                 | 0.0391 <sup>1</sup> |
| Missing                                                 | 2             | 5              |                      | 7               |                     |
| At least 10% drop                                       | 12 (48.0%)    | 3 (13.6%)      |                      | 15 (31.9%)      |                     |
| Stable                                                  | 9 (36.0%)     | 12 (54.5%)     |                      | 21 (44.7%)      |                     |
| At least 10% improvement                                | 4 (16.0%)     | 7 (31.8%)      |                      | 11 (23.4%)      |                     |
| <b>Difference (95% CI)*</b>                             |               |                | -15.8 (-31.6, 0)     |                 |                     |

(report generated on 07MAR2017)  
<sup>1</sup>Chi-Square  
\* difference in proportion in the last category (At least 10% improvement)

**FACT-BR Functional Well-Being Subscore  
Change from Baseline**

|                                                          | SRS<br>(N=27) | WBRT<br>(N=27) |                   | Total<br>(N=54) | p value             |
|----------------------------------------------------------|---------------|----------------|-------------------|-----------------|---------------------|
| <b>FACT-BR Functional Well-Being Subscore: 3-Months</b>  |               |                |                   |                 |                     |
| N                                                        | 25            | 27             |                   | 52              |                     |
| Mean (SD)                                                | 7.0 (26.4)    | -7.7 (13.9)    |                   | -0.6 (21.9)     |                     |
| Median                                                   | 14.3          | -3.6           |                   | -3.6            |                     |
| Q1, Q3                                                   | -3.6, 25.0    | -17.9, 0.0     |                   | -14.3, 14.3     |                     |
| Range                                                    | (-60.7-57.1)  | (-46.4-17.9)   |                   | (-60.7-57.1)    |                     |
| <b>Difference (95% CI)</b>                               |               |                | 14.7 (3.1, 26.3)  |                 |                     |
| <b>FACT-BR Functional Well-Being Subscore: 6-Months</b>  |               |                |                   |                 |                     |
| N                                                        | 26            | 26             |                   | 52              | 0.0723 <sup>1</sup> |
| Mean (SD)                                                | 6.3 (20.8)    | -2.7 (13.7)    |                   | 1.8 (18.0)      |                     |
| Median                                                   | 5.4           | -3.6           |                   | 0.0             |                     |
| Q1, Q3                                                   | -7.1, 14.3    | -14.3, 10.7    |                   | -8.9, 14.3      |                     |
| Range                                                    | (-35.7-53.6)  | (-25.0-21.4)   |                   | (-35.7-53.6)    |                     |
| <b>Difference (95% CI)</b>                               |               |                | 9 (-0.6, 18.6)    |                 |                     |
| <b>FACT-BR Functional Well-Being Subscore: 9-Months</b>  |               |                |                   |                 |                     |
| N                                                        | 24            | 27             |                   | 51              | 0.3034 <sup>1</sup> |
| Mean (SD)                                                | 1.2 (24.8)    | 7.7 (19.1)     |                   | 4.6 (22.0)      |                     |
| Median                                                   | -1.8          | 10.7           |                   | 3.6             |                     |
| Q1, Q3                                                   | -14.3, 12.5   | -7.1, 21.4     |                   | -10.7, 17.9     |                     |
| Range                                                    | (-40.0-53.6)  | (-25.0-57.1)   |                   | (-40.0-57.1)    |                     |
| <b>Difference (95% CI)</b>                               |               |                | -6.5 (-18.8, 5.8) |                 |                     |
| <b>FACT-BR Functional Well-Being Subscore: 12-Months</b> |               |                |                   |                 |                     |
| N                                                        | 24            | 22             |                   | 46              | 0.3874 <sup>1</sup> |
| Mean (SD)                                                | -3.4 (20.1)   | 1.9 (20.9)     |                   | -0.9 (20.4)     |                     |
| Median                                                   | -3.6          | -2.4           |                   | -3.6            |                     |
| Q1, Q3                                                   | -10.7, 5.4    | -14.3, 10.7    |                   | -10.7, 7.1      |                     |
| Range                                                    | (-53.6-53.6)  | (-32.1-39.3)   |                   | (-53.6-53.6)    |                     |
| <b>Difference (95% CI)</b>                               |               |                | -5.3 (-17.2, 6.6) |                 |                     |

(report generated on 07MAR2017)

<sup>1</sup>Unequal Variance T-Test

| FACT-BR Functional Well-Being Subscore<br>Categorical Change from Baseline |               |                |                     |                 |                     |
|----------------------------------------------------------------------------|---------------|----------------|---------------------|-----------------|---------------------|
|                                                                            | SRS<br>(N=27) | WBRT<br>(N=27) |                     | Total<br>(N=54) | p value             |
| <b>FACT-BR Functional Well-Being Subscore: 3-Months</b>                    |               |                |                     |                 |                     |
| Missing                                                                    | 1             | 0              |                     | 1               | 0.0084 <sup>1</sup> |
| At least 10% drop                                                          | 6 (23.1%)     | 12 (44.4%)     |                     | 18 (34.0%)      |                     |
| Stable                                                                     | 7 (26.9%)     | 12 (44.4%)     |                     | 19 (35.8%)      |                     |
| At least 10% improvement                                                   | 13 (50.0%)    | 3 (11.1%)      |                     | 16 (30.2%)      |                     |
| <b>Difference (95% CI)*</b>                                                |               |                | 38.9 (23.1, 54.6)   |                 |                     |
| <b>FACT-BR Functional Well-Being Subscore: 6-Months</b>                    |               |                |                     |                 |                     |
| Missing                                                                    | 0             | 1              |                     | 1               | 0.3568 <sup>1</sup> |
| At least 10% drop                                                          | 5 (18.5%)     | 9 (34.6%)      |                     | 14 (26.4%)      |                     |
| Stable                                                                     | 11 (40.7%)    | 10 (38.5%)     |                     | 21 (39.6%)      |                     |
| At least 10% improvement                                                   | 11 (40.7%)    | 7 (26.9%)      |                     | 18 (34.0%)      |                     |
| <b>Difference (95% CI)*</b>                                                |               |                | 13.8 (-3.8, 31.5)   |                 |                     |
| <b>FACT-BR Functional Well-Being Subscore: 9-Months</b>                    |               |                |                     |                 |                     |
| Missing                                                                    | 2             | 0              |                     | 2               | 0.2584 <sup>1</sup> |
| At least 10% drop                                                          | 9 (36.0%)     | 5 (18.5%)      |                     | 14 (26.9%)      |                     |
| Stable                                                                     | 8 (32.0%)     | 8 (29.6%)      |                     | 16 (30.8%)      |                     |
| At least 10% improvement                                                   | 8 (32.0%)     | 14 (51.9%)     |                     | 22 (42.3%)      |                     |
| <b>Difference (95% CI)*</b>                                                |               |                | -19.9 (-38.1, -1.6) |                 |                     |
| <b>FACT-BR Functional Well-Being Subscore: 12-Months</b>                   |               |                |                     |                 |                     |
| Missing                                                                    | 2             | 5              |                     | 7               | 0.3734 <sup>1</sup> |
| At least 10% drop                                                          | 8 (32.0%)     | 7 (31.8%)      |                     | 15 (31.9%)      |                     |
| Stable                                                                     | 14 (56.0%)    | 9 (40.9%)      |                     | 23 (48.9%)      |                     |
| At least 10% improvement                                                   | 3 (12.0%)     | 6 (27.3%)      |                     | 9 (19.1%)       |                     |
| <b>Difference (95% CI)*</b>                                                |               |                | -15.3 (-30, -0.6)   |                 |                     |
| (report generated on 07MAR2017)                                            |               |                |                     |                 |                     |
| <sup>1</sup> Chi-Square                                                    |               |                |                     |                 |                     |
| * difference in proportion in the last category (At least 10% improvement) |               |                |                     |                 |                     |

| <b>FACT-BR General Score<br/>Change from Baseline</b> |               |                |                   |                 |                     |
|-------------------------------------------------------|---------------|----------------|-------------------|-----------------|---------------------|
|                                                       | SRS<br>(N=27) | WBRT<br>(N=27) |                   | Total<br>(N=54) | p value             |
| <b>FACT-BR General Score: 3-Months</b>                |               |                |                   |                 |                     |
| N                                                     | 25            | 25             |                   | 50              |                     |
| Mean (SD)                                             | 0.6 (17.2)    | -7.5 (12.6)    |                   | -3.5 (15.5)     |                     |
| Median                                                | 3.7           | -4.6           |                   | -1.5            |                     |
| Q1, Q3                                                | -7.4, 9.4     | -13.1, 1.4     |                   | -13.0, 5.6      |                     |
| Range                                                 | (-28.7-41.7)  | (-35.3-11.1)   |                   | (-35.3-41.7)    |                     |
| <b>Difference (95% CI)</b>                            |               |                | 8.1 (-0.3, 16.5)  |                 |                     |
| <b>FACT-BR General Score: 6-Months</b>                |               |                |                   |                 |                     |
| N                                                     | 25            | 25             |                   | 50              | 0.5649 <sup>1</sup> |
| Mean (SD)                                             | 1.2 (13.8)    | -0.9 (11.3)    |                   | 0.1 (12.5)      |                     |
| Median                                                | 3.1           | 0.9            |                   | 1.1             |                     |
| Q1, Q3                                                | -8.3, 6.5     | -10.2, 7.1     |                   | -10.2, 7.1      |                     |
| Range                                                 | (-20.4-39.8)  | (-18.2-21.8)   |                   | (-20.4-39.8)    |                     |
| <b>Difference (95% CI)</b>                            |               |                | 2.1 (-4.9, 9.1)   |                 |                     |
| <b>FACT-BR General Score: 9-Months</b>                |               |                |                   |                 |                     |
| N                                                     | 24            | 26             |                   | 50              | 0.0993 <sup>1</sup> |
| Mean (SD)                                             | -4.1 (16.6)   | 3.1 (12.9)     |                   | -0.4 (15.1)     |                     |
| Median                                                | -2.3          | 3.4            |                   | -1.2            |                     |
| Q1, Q3                                                | -16.7, 4.6    | -2.8, 11.1     |                   | -8.0, 7.3       |                     |
| Range                                                 | (-38.0-41.7)  | (-29.8-28.7)   |                   | (-38.0-41.7)    |                     |
| <b>Difference (95% CI)</b>                            |               |                | -7.2 (-15.5, 1.1) |                 |                     |
| <b>FACT-BR General Score: 12-Months</b>               |               |                |                   |                 |                     |
| N                                                     | 24            | 21             |                   | 45              | 0.0396 <sup>1</sup> |
| Mean (SD)                                             | -6.6 (10.5)   | 1.2 (13.7)     |                   | -3.0 (12.6)     |                     |
| Median                                                | -9.2          | 1.5            |                   | -3.7            |                     |
| Q1, Q3                                                | -12.3, -1.9   | -11.1, 11.1    |                   | -12.0, 6.3      |                     |
| Range                                                 | (-26.9-23.1)  | (-20.2-23.0)   |                   | (-26.9-23.1)    |                     |
| <b>Difference (95% CI)</b>                            |               |                | -7.8 (-15, -0.6)  |                 |                     |
| (report generated on 07MAR2017)                       |               |                |                   |                 |                     |
| <sup>1</sup> Unequal Variance T-Test                  |               |                |                   |                 |                     |

| <b>FACT-BR General Score<br/>Categorical Change from Baseline</b>          |               |                |                      |                 |                     |
|----------------------------------------------------------------------------|---------------|----------------|----------------------|-----------------|---------------------|
|                                                                            | SRS<br>(N=27) | WBRT<br>(N=27) |                      | Total<br>(N=54) | p value             |
| <b>FACT-BR General Score: 3-Months</b>                                     |               |                |                      |                 | 0.0606 <sup>1</sup> |
| Missing                                                                    | 1             | 1              |                      | 2               |                     |
| At least 10% drop                                                          | 6 (23.1%)     | 12 (46.2%)     |                      | 18 (34.6%)      |                     |
| Stable                                                                     | 14 (53.8%)    | 13 (50.0%)     |                      | 27 (51.9%)      |                     |
| At least 10% improvement                                                   | 6 (23.1%)     | 1 (3.8%)       |                      | 7 (13.5%)       |                     |
| <b>Difference (95% CI)*</b>                                                |               |                | 19.2 (6.9, 31.6)     |                 |                     |
| <b>FACT-BR General Score: 6-Months</b>                                     |               |                |                      |                 | 0.9481 <sup>1</sup> |
| Missing                                                                    | 1             | 1              |                      | 2               |                     |
| At least 10% drop                                                          | 7 (26.9%)     | 8 (30.8%)      |                      | 15 (28.8%)      |                     |
| Stable                                                                     | 13 (50.0%)    | 12 (46.2%)     |                      | 25 (48.1%)      |                     |
| At least 10% improvement                                                   | 6 (23.1%)     | 6 (23.1%)      |                      | 12 (23.1%)      |                     |
| <b>Difference (95% CI)*</b>                                                |               |                | 0 (-15.9, 15.9)      |                 |                     |
| <b>FACT-BR General Score: 9-Months</b>                                     |               |                |                      |                 | 0.4042 <sup>1</sup> |
| Missing                                                                    | 2             | 0              |                      | 2               |                     |
| At least 10% drop                                                          | 8 (32.0%)     | 6 (22.2%)      |                      | 14 (26.9%)      |                     |
| Stable                                                                     | 14 (56.0%)    | 14 (51.9%)     |                      | 28 (53.8%)      |                     |
| At least 10% improvement                                                   | 3 (12.0%)     | 7 (25.9%)      |                      | 10 (19.2%)      |                     |
| <b>Difference (95% CI)*</b>                                                |               |                | -13.9 (-28.5, 0.6)   |                 |                     |
| <b>FACT-BR General Score: 12-Months</b>                                    |               |                |                      |                 | 0.0763 <sup>1</sup> |
| Missing                                                                    | 2             | 5              |                      | 7               |                     |
| At least 10% drop                                                          | 12 (48.0%)    | 7 (31.8%)      |                      | 19 (40.4%)      |                     |
| Stable                                                                     | 12 (48.0%)    | 9 (40.9%)      |                      | 21 (44.7%)      |                     |
| At least 10% improvement                                                   | 1 (4.0%)      | 6 (27.3%)      |                      | 7 (14.9%)       |                     |
| <b>Difference (95% CI)*</b>                                                |               |                | -23.3 (-36.3, -10.3) |                 |                     |
| (report generated on 07MAR2017)                                            |               |                |                      |                 |                     |
| <sup>1</sup> Chi-Square                                                    |               |                |                      |                 |                     |
| * difference in proportion in the last category (At least 10% improvement) |               |                |                      |                 |                     |

| FACT-BR Additional Concerns<br>Change from Baseline |               |                |                  |                 |         |
|-----------------------------------------------------|---------------|----------------|------------------|-----------------|---------|
|                                                     | SRS<br>(N=27) | WBRT<br>(N=27) |                  | Total<br>(N=54) | p value |
| <b>FACT-BR Additional Concerns: 3-Months</b>        |               |                |                  |                 |         |
| N                                                   | 26            | 27             |                  | 53              |         |
| Mean (SD)                                           | 6.3 (18.1)    | -4.1 (13.6)    |                  | 1.0 (16.6)      |         |
| Median                                              | 2.7           | -1.1           |                  | 0.3             |         |
| Q1, Q3                                              | -1.1, 10.9    | -10.9, 3.3     |                  | -5.4, 7.6       |         |
| Range                                               | (-21.7-62.0)  | (-40.2-20.3)   |                  | (-40.2-62.0)    |         |
| <b>Difference (95% CI)</b>                          |               |                | 10.4 (1.8, 19)   |                 |         |
| <b>FACT-BR Additional Concerns: 6-Months</b>        |               |                |                  |                 |         |
| N                                                   | 25            | 25             |                  | 50              |         |
| Mean (SD)                                           | 6.9 (15.8)    | -1.0 (12.7)    |                  | 3.0 (14.7)      |         |
| Median                                              | 6.5           | 3.6            |                  | 4.3             |         |
| Q1, Q3                                              | -1.1, 10.9    | -8.7, 6.5      |                  | -5.4, 9.8       |         |
| Range                                               | (-21.7-59.8)  | (-25.3-25.0)   |                  | (-25.3-59.8)    |         |
| <b>Difference (95% CI)</b>                          |               |                | 7.9 (0, 15.8)    |                 |         |
| <b>FACT-BR Additional Concerns: 9-Months</b>        |               |                |                  |                 |         |
| N                                                   | 24            | 27             |                  | 51              |         |
| Mean (SD)                                           | 4.8 (16.0)    | -1.6 (11.7)    |                  | 1.4 (14.1)      |         |
| Median                                              | 1.1           | -1.1           |                  | 0.0             |         |
| Q1, Q3                                              | -4.3, 10.0    | -9.8, 6.5      |                  | -6.5, 7.6       |         |
| Range                                               | (-18.5-53.3)  | (-23.9-29.3)   |                  | (-23.9-53.3)    |         |
| <b>Difference (95% CI)</b>                          |               |                | 6.4 (-1.4, 14.2) |                 |         |
| <b>FACT-BR Additional Concerns: 12-Months</b>       |               |                |                  |                 |         |
| N                                                   | 24            | 23             |                  | 47              |         |
| Mean (SD)                                           | -0.7 (14.7)   | -2.9 (15.1)    |                  | -1.8 (14.8)     |         |
| Median                                              | -2.2          | -3.3           |                  | -3.3            |         |
| Q1, Q3                                              | -12.5, 7.6    | -12.0, 6.1     |                  | -12.0, 7.6      |         |
| Range                                               | (-22.7-35.9)  | (-39.4-22.5)   |                  | (-39.4-35.9)    |         |
| <b>Difference (95% CI)</b>                          |               |                | 2.2 (-6.3, 10.7) |                 |         |
| (report generated on 07MAR2017)                     |               |                |                  |                 |         |
| <sup>1</sup> Unequal Variance T-Test                |               |                |                  |                 |         |

| <b>FACT-BR Additional Concerns<br/>Categorical Change from Baseline</b>    |               |                |                    |                 |                     |
|----------------------------------------------------------------------------|---------------|----------------|--------------------|-----------------|---------------------|
|                                                                            | SRS<br>(N=27) | WBRT<br>(N=27) |                    | Total<br>(N=54) | p value             |
| <b>FACT-BR Additional Concerns: 3-Months</b>                               |               |                |                    |                 | 0.0610 <sup>1</sup> |
| At least 10% drop                                                          | 5 (18.5%)     | 7 (25.9%)      |                    | 12 (22.2%)      |                     |
| Stable                                                                     | 13 (48.1%)    | 18 (66.7%)     |                    | 31 (57.4%)      |                     |
| At least 10% improvement                                                   | 9 (33.3%)     | 2 (7.4%)       |                    | 11 (20.4%)      |                     |
| <b>Difference (95% CI)*</b>                                                |               |                | 25.9 (11.5, 40.3)  |                 |                     |
| <b>FACT-BR Additional Concerns: 6-Months</b>                               |               |                |                    |                 | 0.1933 <sup>1</sup> |
| Missing                                                                    | 1             | 2              |                    | 3               |                     |
| At least 10% drop                                                          | 3 (11.5%)     | 6 (24.0%)      |                    | 9 (17.6%)       |                     |
| Stable                                                                     | 15 (57.7%)    | 16 (64.0%)     |                    | 31 (60.8%)      |                     |
| At least 10% improvement                                                   | 8 (30.8%)     | 3 (12.0%)      |                    | 11 (21.6%)      |                     |
| <b>Difference (95% CI)*</b>                                                |               |                | 18.8 (3.7, 33.8)   |                 |                     |
| <b>FACT-BR Additional Concerns: 9-Months</b>                               |               |                |                    |                 | 0.3599 <sup>1</sup> |
| Missing                                                                    | 2             | 0              |                    | 2               |                     |
| At least 10% drop                                                          | 3 (12.0%)     | 6 (22.2%)      |                    | 9 (17.3%)       |                     |
| Stable                                                                     | 16 (64.0%)    | 18 (66.7%)     |                    | 34 (65.4%)      |                     |
| At least 10% improvement                                                   | 6 (24.0%)     | 3 (11.1%)      |                    | 9 (17.3%)       |                     |
| <b>Difference (95% CI)*</b>                                                |               |                | 12.9 (-1.3, 27)    |                 |                     |
| <b>FACT-BR Additional Concerns: 12-Months</b>                              |               |                |                    |                 | 0.9036 <sup>1</sup> |
| Missing                                                                    | 2             | 4              |                    | 6               |                     |
| At least 10% drop                                                          | 8 (32.0%)     | 6 (26.1%)      |                    | 14 (29.2%)      |                     |
| Stable                                                                     | 12 (48.0%)    | 12 (52.2%)     |                    | 24 (50.0%)      |                     |
| At least 10% improvement                                                   | 5 (20.0%)     | 5 (21.7%)      |                    | 10 (20.8%)      |                     |
| <b>Difference (95% CI)*</b>                                                |               |                | -1.7 (-17.1, 13.6) |                 |                     |
| (report generated on 07MAR2017)                                            |               |                |                    |                 |                     |
| <sup>1</sup> Chi-Square                                                    |               |                |                    |                 |                     |
| * difference in proportion in the last category (At least 10% improvement) |               |                |                    |                 |                     |



| <b>FACT-BR Total Score<br/>Change from Baseline</b> |               |                |                   |                 |                     |
|-----------------------------------------------------|---------------|----------------|-------------------|-----------------|---------------------|
|                                                     | SRS<br>(N=27) | WBRT<br>(N=27) |                   | Total<br>(N=54) | p value             |
| <b>FACT-BR Total Score: 3-Months</b>                |               |                |                   |                 | 0.0310 <sup>1</sup> |
| N                                                   | 24            | 25             |                   | 49              |                     |
| Mean (SD)                                           | 2.9 (16.7)    | -6.1 (10.9)    |                   | -1.7 (14.6)     |                     |
| Median                                              | 0.1           | -6.1           |                   | -1.0            |                     |
| Q1, Q3                                              | -4.3, 7.9     | -12.0, 2.0     |                   | -11.0, 3.9      |                     |
| Range                                               | (-25.5-51.0)  | (-31.5-12.5)   |                   | (-31.5-51.0)    |                     |
| <b>Difference (95% CI)</b>                          |               |                | 9 (1.1, 16.9)     |                 |                     |
| <b>FACT-BR Total Score: 6-Months</b>                |               |                |                   |                 | 0.2578 <sup>1</sup> |
| N                                                   | 24            | 24             |                   | 48              |                     |
| Mean (SD)                                           | 3.4 (13.6)    | -0.7 (10.8)    |                   | 1.3 (12.3)      |                     |
| Median                                              | 1.3           | -1.3           |                   | 0.9             |                     |
| Q1, Q3                                              | -6.0, 8.3     | -6.4, 7.3      |                   | -6.4, 8.0       |                     |
| Range                                               | (-19.5-49.0)  | (-20.5-19.2)   |                   | (-20.5-49.0)    |                     |
| <b>Difference (95% CI)</b>                          |               |                | 4.1 (-2.8, 11)    |                 |                     |
| <b>FACT-BR Total Score: 9-Months</b>                |               |                |                   |                 | 0.9344 <sup>1</sup> |
| N                                                   | 23            | 26             |                   | 49              |                     |
| Mean (SD)                                           | 0.7 (14.7)    | 1.0 (11.2)     |                   | 0.9 (12.8)      |                     |
| Median                                              | -1.8          | -1.6           |                   | -1.7            |                     |
| Q1, Q3                                              | -8.3, 5.9     | -5.6, 9.5      |                   | -7.0, 6.9       |                     |
| Range                                               | (-23.0-47.0)  | (-22.1-29.0)   |                   | (-23.0-47.0)    |                     |
| <b>Difference (95% CI)</b>                          |               |                | -0.3 (-7.7, 7.1)  |                 |                     |
| <b>FACT-BR Total Score: 12-Months</b>               |               |                |                   |                 | 0.3251 <sup>1</sup> |
| N                                                   | 23            | 21             |                   | 44              |                     |
| Mean (SD)                                           | -4.4 (11.2)   | -0.7 (13.6)    |                   | -2.6 (12.4)     |                     |
| Median                                              | -7.0          | 2.0            |                   | -4.8            |                     |
| Q1, Q3                                              | -10.5, -2.0   | -10.0, 8.4     |                   | -10.3, 5.0      |                     |
| Range                                               | (-25.0-29.0)  | (-28.7-22.4)   |                   | (-28.7-29.0)    |                     |
| <b>Difference (95% CI)</b>                          |               |                | -3.7 (-11.1, 3.7) |                 |                     |
| (report generated on 07MAR2017)                     |               |                |                   |                 |                     |
| <sup>1</sup> Unequal Variance T-Test                |               |                |                   |                 |                     |

| FACT-BR Total Score<br>Categorical Change from Baseline                    |               |                |                    |                 |                     |
|----------------------------------------------------------------------------|---------------|----------------|--------------------|-----------------|---------------------|
|                                                                            | SRS<br>(N=27) | WBRT<br>(N=27) |                    | Total<br>(N=54) | p value             |
| <b>FACT-BR Total Score: 3-Months</b>                                       |               |                |                    |                 | 0.4278 <sup>1</sup> |
| Missing                                                                    | 1             | 1              |                    | 2               |                     |
| At least 10% drop                                                          | 7 (26.9%)     | 11 (42.3%)     |                    | 18 (34.6%)      |                     |
| Stable                                                                     | 15 (57.7%)    | 13 (50.0%)     |                    | 28 (53.8%)      |                     |
| At least 10% improvement                                                   | 4 (15.4%)     | 2 (7.7%)       |                    | 6 (11.5%)       |                     |
| <b>Difference (95% CI)*</b>                                                |               |                | 7.7 (-4.3, 19.7)   |                 |                     |
| <b>FACT-BR Total Score: 6-Months</b>                                       |               |                |                    |                 | 0.6341 <sup>1</sup> |
| Missing                                                                    | 1             | 2              |                    | 3               |                     |
| At least 10% drop                                                          | 4 (15.4%)     | 6 (24.0%)      |                    | 10 (19.6%)      |                     |
| Stable                                                                     | 17 (65.4%)    | 16 (64.0%)     |                    | 33 (64.7%)      |                     |
| At least 10% improvement                                                   | 5 (19.2%)     | 3 (12.0%)      |                    | 8 (15.7%)       |                     |
| <b>Difference (95% CI)*</b>                                                |               |                | 7.2 (-6.4, 20.9)   |                 |                     |
| <b>FACT-BR Total Score: 9-Months</b>                                       |               |                |                    |                 | 0.8895 <sup>1</sup> |
| Missing                                                                    | 2             | 0              |                    | 2               |                     |
| At least 10% drop                                                          | 7 (28.0%)     | 6 (22.2%)      |                    | 13 (25.0%)      |                     |
| Stable                                                                     | 13 (52.0%)    | 15 (55.6%)     |                    | 28 (53.8%)      |                     |
| At least 10% improvement                                                   | 5 (20.0%)     | 6 (22.2%)      |                    | 11 (21.2%)      |                     |
| <b>Difference (95% CI)*</b>                                                |               |                | -2.2 (-17.6, 13.2) |                 |                     |
| <b>FACT-BR Total Score: 12-Months</b>                                      |               |                |                    |                 | 0.5800 <sup>1</sup> |
| Missing                                                                    | 2             | 5              |                    | 7               |                     |
| At least 10% drop                                                          | 9 (36.0%)     | 7 (31.8%)      |                    | 16 (34.0%)      |                     |
| Stable                                                                     | 14 (56.0%)    | 11 (50.0%)     |                    | 25 (53.2%)      |                     |
| At least 10% improvement                                                   | 2 (8.0%)      | 4 (18.2%)      |                    | 6 (12.8%)       |                     |
| <b>Difference (95% CI)*</b>                                                |               |                | -10.2 (-22.8, 2.4) |                 |                     |
| (report generated on 07MAR2017)                                            |               |                |                    |                 |                     |
| <sup>1</sup> Chi-Square                                                    |               |                |                    |                 |                     |
| * difference in proportion in the last category (At least 10% improvement) |               |                |                    |                 |                     |

| <b>Barthel ADL Index<br/>Change from Baseline</b> |               |                |                 |                 |                     |
|---------------------------------------------------|---------------|----------------|-----------------|-----------------|---------------------|
|                                                   | SRS<br>(N=27) | WBRT<br>(N=27) |                 | Total<br>(N=54) | p value             |
| <b>Barthel ADL Index: 3-Months</b>                |               |                |                 |                 | 0.0261 <sup>1</sup> |
| N                                                 | 26            | 27             |                 | 53              |                     |
| Mean (SD)                                         | 3.3 (7.2)     | -0.2 (2.2)     |                 | 1.5 (5.5)       |                     |
| Median                                            | 0.0           | 0.0            |                 | 0.0             |                     |
| Q1, Q3                                            | 0.0, 0.0      | 0.0, 0.0       |                 | 0.0, 0.0        |                     |
| Range                                             | (0.0-25.0)    | (-5.0-5.0)     |                 | (-5.0-25.0)     |                     |
| <b>Difference (95% CI)</b>                        |               |                | 3.5 (0.6, 6.4)  |                 |                     |
| <b>Barthel ADL Index: 6-Months</b>                |               |                |                 |                 | 0.1077 <sup>1</sup> |
| N                                                 | 26            | 26             |                 | 52              |                     |
| Mean (SD)                                         | 2.1 (6.5)     | -0.4 (4.2)     |                 | 0.9 (5.6)       |                     |
| Median                                            | 0.0           | 0.0            |                 | 0.0             |                     |
| Q1, Q3                                            | 0.0, 0.0      | 0.0, 0.0       |                 | 0.0, 0.0        |                     |
| Range                                             | (-5.0-25.0)   | (-20.0-5.0)    |                 | (-20.0-25.0)    |                     |
| <b>Difference (95% CI)</b>                        |               |                | 2.5 (-0.5, 5.5) |                 |                     |
| <b>Barthel ADL Index: 9-Months</b>                |               |                |                 |                 | 0.0537 <sup>1</sup> |
| N                                                 | 24            | 27             |                 | 51              |                     |
| Mean (SD)                                         | 3.1 (8.3)     | -1.7 (9.0)     |                 | 0.6 (8.9)       |                     |
| Median                                            | 0.0           | 0.0            |                 | 0.0             |                     |
| Q1, Q3                                            | 0.0, 0.0      | 0.0, 0.0       |                 | 0.0, 0.0        |                     |
| Range                                             | (-5.0-25.0)   | (-45.0-5.0)    |                 | (-45.0-25.0)    |                     |
| <b>Difference (95% CI)</b>                        |               |                | 4.8 (0.1, 9.5)  |                 |                     |
| <b>Barthel ADL Index: 12-Months</b>               |               |                |                 |                 | 0.0654 <sup>1</sup> |
| N                                                 | 26            | 23             |                 | 49              |                     |
| Mean (SD)                                         | 2.5 (8.2)     | -2.4 (9.8)     |                 | 0.2 (9.2)       |                     |
| Median                                            | 0.0           | 0.0            |                 | 0.0             |                     |
| Q1, Q3                                            | 0.0, 0.0      | 0.0, 0.0       |                 | 0.0, 0.0        |                     |
| Range                                             | (-15.0-25.0)  | (-45.0-5.0)    |                 | (-45.0-25.0)    |                     |
| <b>Difference (95% CI)</b>                        |               |                | 4.9 (-0.2, 10)  |                 |                     |
| (report generated on 07MAR2017)                   |               |                |                 |                 |                     |
| <sup>1</sup> Unequal Variance T-Test              |               |                |                 |                 |                     |

| <b>Barthel ADL Index<br/>Categorical Change from Baseline</b>              |               |                |                  |                 |                     |
|----------------------------------------------------------------------------|---------------|----------------|------------------|-----------------|---------------------|
|                                                                            | SRS<br>(N=27) | WBRT<br>(N=27) |                  | Total<br>(N=54) | p value             |
| <b>Barthel ADL Index: 3-Months</b>                                         |               |                |                  |                 | 0.0340 <sup>1</sup> |
| Missing                                                                    | 1             | 0              |                  | 1               |                     |
| Stable                                                                     | 22 (84.6%)    | 27 (100.0%)    |                  | 49 (92.5%)      |                     |
| At least 10% improvement                                                   | 4 (15.4%)     | 0 (0.0%)       |                  | 4 (7.5%)        |                     |
| <b>Difference (95% CI)*</b>                                                |               |                | 15.4 (5.8, 25)   |                 |                     |
| <b>Barthel ADL Index: 6-Months</b>                                         |               |                |                  |                 | 0.1298 <sup>1</sup> |
| Missing                                                                    | 1             | 1              |                  | 2               |                     |
| At least 10% drop                                                          | 0 (0.0%)      | 1 (3.8%)       |                  | 1 (1.9%)        |                     |
| Stable                                                                     | 23 (88.5%)    | 25 (96.2%)     |                  | 48 (92.3%)      |                     |
| At least 10% improvement                                                   | 3 (11.5%)     | 0 (0.0%)       |                  | 3 (5.8%)        |                     |
| <b>Difference (95% CI)*</b>                                                |               |                | 11.5 (3, 20.1)   |                 |                     |
| <b>Barthel ADL Index: 9-Months</b>                                         |               |                |                  |                 | 0.0407 <sup>1</sup> |
| Missing                                                                    | 3             | 0              |                  | 3               |                     |
| At least 10% drop                                                          | 0 (0.0%)      | 2 (7.4%)       |                  | 2 (3.9%)        |                     |
| Stable                                                                     | 20 (83.3%)    | 25 (92.6%)     |                  | 45 (88.2%)      |                     |
| At least 10% improvement                                                   | 4 (16.7%)     | 0 (0.0%)       |                  | 4 (7.8%)        |                     |
| <b>Difference (95% CI)*</b>                                                |               |                | 16.7 (6.7, 26.6) |                 |                     |
| <b>Barthel ADL Index: 12-Months</b>                                        |               |                |                  |                 | 0.1246 <sup>1</sup> |
| Missing                                                                    | 1             | 4              |                  | 5               |                     |
| At least 10% drop                                                          | 1 (3.8%)      | 2 (8.7%)       |                  | 3 (6.1%)        |                     |
| Stable                                                                     | 21 (80.8%)    | 21 (91.3%)     |                  | 42 (85.7%)      |                     |
| At least 10% improvement                                                   | 4 (15.4%)     | 0 (0.0%)       |                  | 4 (8.2%)        |                     |
| <b>Difference (95% CI)*</b>                                                |               |                | 15.4 (5.8, 25)   |                 |                     |
| (report generated on 07MAR2017)                                            |               |                |                  |                 |                     |
| <sup>1</sup> Chi-Square                                                    |               |                |                  |                 |                     |
| * difference in proportion in the last category (At least 10% improvement) |               |                |                  |                 |                     |

| Overall QOL Uniscale<br>Change from Baseline |               |                |                   |                 |                     |
|----------------------------------------------|---------------|----------------|-------------------|-----------------|---------------------|
|                                              | SRS<br>(N=27) | WBRT<br>(N=27) |                   | Total<br>(N=54) | p value             |
| <b>Overall QOL Uniscale: 3-Months</b>        |               |                |                   |                 | 0.0836 <sup>1</sup> |
| N                                            | 27            | 26             |                   | 53              |                     |
| Mean (SD)                                    | 10.7 (28.1)   | -1.9 (24.0)    |                   | 4.5 (26.7)      |                     |
| Median                                       | 0.0           | -5.0           |                   | 0.0             |                     |
| Q1, Q3                                       | 0.0, 30.0     | -20.0, 10.0    |                   | -10.0, 20.0     |                     |
| Range                                        | (-50.0-80.0)  | (-40.0-60.0)   |                   | (-50.0-80.0)    |                     |
| <b>Difference (95% CI)</b>                   |               |                | 12.6 (-1.5, 26.7) |                 |                     |
|                                              |               |                |                   |                 |                     |
| <b>Overall QOL Uniscale: 6-Months</b>        |               |                |                   |                 | 0.3686 <sup>1</sup> |
| N                                            | 27            | 25             |                   | 52              |                     |
| Mean (SD)                                    | 10.4 (33.5)   | 3.2 (22.9)     |                   | 6.9 (28.8)      |                     |
| Median                                       | 10.0          | 0.0            |                   | 0.0             |                     |
| Q1, Q3                                       | 0.0, 20.0     | -10.0, 20.0    |                   | -10.0, 20.0     |                     |
| Range                                        | (-80.0-100.0) | (-30.0-60.0)   |                   | (-80.0-100.0)   |                     |
| <b>Difference (95% CI)</b>                   |               |                | 7.2 (-8.3, 22.7)  |                 |                     |
|                                              |               |                |                   |                 |                     |
| <b>Overall QOL Uniscale: 9-Months</b>        |               |                |                   |                 | 0.1618 <sup>1</sup> |
| N                                            | 24            | 26             |                   | 50              |                     |
| Mean (SD)                                    | 9.2 (26.0)    | -1.5 (27.2)    |                   | 3.6 (26.9)      |                     |
| Median                                       | 0.0           | 0.0            |                   | 0.0             |                     |
| Q1, Q3                                       | -10.0, 20.0   | -20.0, 10.0    |                   | -10.0, 20.0     |                     |
| Range                                        | (-30.0-90.0)  | (-60.0-80.0)   |                   | (-60.0-90.0)    |                     |
| <b>Difference (95% CI)</b>                   |               |                | 10.7 (-4, 25.4)   |                 |                     |
|                                              |               |                |                   |                 |                     |
| <b>Overall QOL Uniscale: 12-Months</b>       |               |                |                   |                 | 0.6476 <sup>1</sup> |
| N                                            | 25            | 22             |                   | 47              |                     |
| Mean (SD)                                    | 2.0 (22.5)    | -1.4 (27.0)    |                   | 0.4 (24.5)      |                     |
| Median                                       | 0.0           | -5.0           |                   | 0.0             |                     |
| Q1, Q3                                       | -10.0, 10.0   | -10.0, 10.0    |                   | -10.0, 10.0     |                     |
| Range                                        | (-40.0-60.0)  | (-70.0-70.0)   |                   | (-70.0-70.0)    |                     |
| <b>Difference (95% CI)</b>                   |               |                | 3.4 (-10.9, 17.7) |                 |                     |
| (report generated on 07MAR2017)              |               |                |                   |                 |                     |
| <sup>1</sup> Unequal Variance T-Test         |               |                |                   |                 |                     |

| Overall QOL Uniscale<br>Categorical Change from Baseline                   |               |                |                   |                 |                     |
|----------------------------------------------------------------------------|---------------|----------------|-------------------|-----------------|---------------------|
|                                                                            | SRS<br>(N=27) | WBRT<br>(N=27) |                   | Total<br>(N=54) | p value             |
| <b>Overall QOL Uniscale: 3-Months</b>                                      |               |                |                   |                 | 0.0315 <sup>1</sup> |
| At least 10% drop                                                          | 5 (18.5%)     | 14 (51.9%)     |                   | 19 (35.2%)      |                     |
| Stable                                                                     | 9 (33.3%)     | 4 (14.8%)      |                   | 13 (24.1%)      |                     |
| At least 10% improvement                                                   | 13 (48.1%)    | 9 (33.3%)      |                   | 22 (40.7%)      |                     |
| <b>Difference (95% CI)*</b>                                                |               |                | 14.8 (-3.5, 33.1) |                 |                     |
| <b>Overall QOL Uniscale: 6-Months</b>                                      |               |                |                   |                 | 0.1682 <sup>1</sup> |
| Missing                                                                    | 0             | 1              |                   | 1               |                     |
| At least 10% drop                                                          | 5 (18.5%)     | 11 (42.3%)     |                   | 16 (30.2%)      |                     |
| Stable                                                                     | 7 (25.9%)     | 5 (19.2%)      |                   | 12 (22.6%)      |                     |
| At least 10% improvement                                                   | 15 (55.6%)    | 10 (38.5%)     |                   | 25 (47.2%)      |                     |
| <b>Difference (95% CI)*</b>                                                |               |                | 17.1 (-1.5, 35.6) |                 |                     |
| <b>Overall QOL Uniscale: 9-Months</b>                                      |               |                |                   |                 | 0.3827 <sup>1</sup> |
| Missing                                                                    | 3             | 0              |                   | 3               |                     |
| At least 10% drop                                                          | 7 (29.2%)     | 13 (48.1%)     |                   | 20 (39.2%)      |                     |
| Stable                                                                     | 6 (25.0%)     | 5 (18.5%)      |                   | 11 (21.6%)      |                     |
| At least 10% improvement                                                   | 11 (45.8%)    | 9 (33.3%)      |                   | 20 (39.2%)      |                     |
| <b>Difference (95% CI)*</b>                                                |               |                | 12.5 (-5.8, 30.8) |                 |                     |
| <b>Overall QOL Uniscale: 12-Months</b>                                     |               |                |                   |                 | 0.2578 <sup>1</sup> |
| Missing                                                                    | 2             | 4              |                   | 6               |                     |
| At least 10% drop                                                          | 8 (32.0%)     | 12 (52.2%)     |                   | 20 (41.7%)      |                     |
| Stable                                                                     | 9 (36.0%)     | 4 (17.4%)      |                   | 13 (27.1%)      |                     |
| At least 10% improvement                                                   | 8 (32.0%)     | 7 (30.4%)      |                   | 15 (31.3%)      |                     |
| <b>Difference (95% CI)*</b>                                                |               |                | 1.6 (-15.9, 19)   |                 |                     |
| (report generated on 07MAR2017)                                            |               |                |                   |                 |                     |
| <sup>1</sup> Chi-Square                                                    |               |                |                   |                 |                     |
| * difference in proportion in the last category (At least 10% improvement) |               |                |                   |                 |                     |

| <b>Level of Fatigue Uniscale<br/>Change from Baseline</b> |               |                |                    |                 |                     |
|-----------------------------------------------------------|---------------|----------------|--------------------|-----------------|---------------------|
|                                                           | SRS<br>(N=27) | WBRT<br>(N=27) |                    | Total<br>(N=54) | p value             |
| <b>Level of Fatigue Uniscale: 3-Months</b>                |               |                |                    |                 |                     |
| N                                                         | 27            | 26             |                    | 53              |                     |
| Mean (SD)                                                 | 5.6 (25.9)    | -15.4 (28.6)   |                    | -4.7 (29.0)     |                     |
| Median                                                    | 0.0           | -10.0          |                    | 0.0             |                     |
| Q1, Q3                                                    | -10.0, 30.0   | -40.0, 0.0     |                    | -30.0, 10.0     |                     |
| Range                                                     | (-30.0-70.0)  | (-60.0-60.0)   |                    | (-60.0-70.0)    |                     |
| <b>Difference (95% CI)</b>                                |               |                | 21 (6.3, 35.7)     |                 |                     |
| <b>Level of Fatigue Uniscale: 6-Months</b>                |               |                |                    |                 |                     |
| N                                                         | 27            | 25             |                    | 52              | 0.5751 <sup>1</sup> |
| Mean (SD)                                                 | 0.7 (27.6)    | -4.0 (32.5)    |                    | -1.5 (29.9)     |                     |
| Median                                                    | 0.0           | 0.0            |                    | 0.0             |                     |
| Q1, Q3                                                    | -20.0, 20.0   | -30.0, 10.0    |                    | -20.0, 10.0     |                     |
| Range                                                     | (-40.0-80.0)  | (-70.0-70.0)   |                    | (-70.0-80.0)    |                     |
| <b>Difference (95% CI)</b>                                |               |                | 4.7 (-11.8, 21.2)  |                 |                     |
| <b>Level of Fatigue Uniscale: 9-Months</b>                |               |                |                    |                 |                     |
| N                                                         | 24            | 26             |                    | 50              | 0.5758 <sup>1</sup> |
| Mean (SD)                                                 | -1.3 (29.2)   | 3.1 (24.6)     |                    | 1.0 (26.7)      |                     |
| Median                                                    | -5.0          | 0.0            |                    | 0.0             |                     |
| Q1, Q3                                                    | -20.0, 20.0   | -10.0, 20.0    |                    | -20.0, 20.0     |                     |
| Range                                                     | (-50.0-80.0)  | (-40.0-70.0)   |                    | (-50.0-80.0)    |                     |
| <b>Difference (95% CI)</b>                                |               |                | -4.4 (-19.4, 10.6) |                 |                     |
| <b>Level of Fatigue Uniscale: 12-Months</b>               |               |                |                    |                 |                     |
| N                                                         | 25            | 22             |                    | 47              | 0.8695 <sup>1</sup> |
| Mean (SD)                                                 | -4.0 (22.0)   | -5.5 (35.7)    |                    | -4.7 (28.9)     |                     |
| Median                                                    | 0.0           | 5.0            |                    | 0.0             |                     |
| Q1, Q3                                                    | -20.0, 10.0   | -40.0, 20.0    |                    | -20.0, 20.0     |                     |
| Range                                                     | (-40.0-40.0)  | (-70.0-60.0)   |                    | (-70.0-60.0)    |                     |
| <b>Difference (95% CI)</b>                                |               |                | 1.5 (-15.7, 18.7)  |                 |                     |
| (report generated on 07MAR2017)                           |               |                |                    |                 |                     |
| <sup>1</sup> Unequal Variance T-Test                      |               |                |                    |                 |                     |

| Level of Fatigue Uniscale<br>Categorical Change from Baseline |               |                |                     |                 |                     |
|---------------------------------------------------------------|---------------|----------------|---------------------|-----------------|---------------------|
|                                                               | SRS<br>(N=27) | WBRT<br>(N=27) |                     | Total<br>(N=54) | p value             |
| <b>Level of Fatigue Uniscale: 3-Months</b>                    |               |                |                     |                 | 0.0481 <sup>1</sup> |
| At least 10% drop                                             | 9 (33.3%)     | 18 (66.7%)     |                     | 27 (50.0%)      |                     |
| Stable                                                        | 7 (25.9%)     | 4 (14.8%)      |                     | 11 (20.4%)      |                     |
| At least 10% improvement                                      | 11 (40.7%)    | 5 (18.5%)      |                     | 16 (29.6%)      |                     |
| <b>Difference (95% CI)*</b>                                   |               |                | 22.2 (5.5, 38.9)    |                 |                     |
| <b>Level of Fatigue Uniscale: 6-Months</b>                    |               |                |                     |                 | 0.9833 <sup>1</sup> |
| Missing                                                       | 0             | 1              |                     | 1               |                     |
| At least 10% drop                                             | 12 (44.4%)    | 12 (46.2%)     |                     | 24 (45.3%)      |                     |
| Stable                                                        | 5 (18.5%)     | 5 (19.2%)      |                     | 10 (18.9%)      |                     |
| At least 10% improvement                                      | 10 (37.0%)    | 9 (34.6%)      |                     | 19 (35.8%)      |                     |
| <b>Difference (95% CI)*</b>                                   |               |                | 2.4 (-15.7, 20.5)   |                 |                     |
| <b>Level of Fatigue Uniscale: 9-Months</b>                    |               |                |                     |                 | 0.6434 <sup>1</sup> |
| Missing                                                       | 3             | 0              |                     | 3               |                     |
| At least 10% drop                                             | 12 (50.0%)    | 10 (37.0%)     |                     | 22 (43.1%)      |                     |
| Stable                                                        | 4 (16.7%)     | 6 (22.2%)      |                     | 10 (19.6%)      |                     |
| At least 10% improvement                                      | 8 (33.3%)     | 11 (40.7%)     |                     | 19 (37.3%)      |                     |
| <b>Difference (95% CI)*</b>                                   |               |                | -7.4 (-25.6, 10.8)  |                 |                     |
| <b>Level of Fatigue Uniscale: 12-Months</b>                   |               |                |                     |                 | 0.1093 <sup>1</sup> |
| Missing                                                       | 2             | 4              |                     | 6               |                     |
| At least 10% drop                                             | 12 (48.0%)    | 11 (47.8%)     |                     | 23 (47.9%)      |                     |
| Stable                                                        | 6 (24.0%)     | 1 (4.3%)       |                     | 7 (14.6%)       |                     |
| At least 10% improvement                                      | 7 (28.0%)     | 11 (47.8%)     |                     | 18 (37.5%)      |                     |
| <b>Difference (95% CI)*</b>                                   |               |                | -19.8 (-37.7, -1.9) |                 |                     |

(report generated on 07MAR2017)

<sup>1</sup>Chi-Square

\* difference in proportion in the last category (At least 10% improvement)



| <b>LASA: Overall QOL<br/>Change from Baseline</b> |               |                |                    |                 |                     |
|---------------------------------------------------|---------------|----------------|--------------------|-----------------|---------------------|
|                                                   | SRS<br>(N=27) | WBRT<br>(N=27) |                    | Total<br>(N=54) | p value             |
| <b>LASA: Overall QOL: 3-Months</b>                |               |                |                    |                 | 0.0225 <sup>1</sup> |
| N                                                 | 27            | 24             |                    | 51              |                     |
| Mean (SD)                                         | 6.3 (24.7)    | -7.9 (18.2)    |                    | -0.4 (22.8)     |                     |
| Median                                            | 0.0           | -5.0           |                    | 0.0             |                     |
| Q1, Q3                                            | -10.0, 20.0   | -15.0, 0.0     |                    | -10.0, 10.0     |                     |
| Range                                             | (-40.0-80.0)  | (-50.0-20.0)   |                    | (-50.0-80.0)    |                     |
| <b>Difference (95% CI)</b>                        |               |                | 14.2 (2.4, 26)     |                 |                     |
| <b>LASA: Overall QOL: 6-Months</b>                |               |                |                    |                 | 0.2281 <sup>1</sup> |
| N                                                 | 26            | 25             |                    | 51              |                     |
| Mean (SD)                                         | 9.2 (25.8)    | 0.4 (25.9)     |                    | 4.9 (26.0)      |                     |
| Median                                            | 5.0           | 0.0            |                    | 0.0             |                     |
| Q1, Q3                                            | 0.0, 20.0     | -10.0, 10.0    |                    | -10.0, 20.0     |                     |
| Range                                             | (-30.0-100.0) | (-60.0-60.0)   |                    | (-60.0-100.0)   |                     |
| <b>Difference (95% CI)</b>                        |               |                | 8.8 (-5.4, 23)     |                 |                     |
| <b>LASA: Overall QOL: 9-Months</b>                |               |                |                    |                 | 0.7846 <sup>1</sup> |
| N                                                 | 23            | 25             |                    | 48              |                     |
| Mean (SD)                                         | 1.3 (29.1)    | -0.8 (23.3)    |                    | 0.2 (26.0)      |                     |
| Median                                            | 0.0           | 0.0            |                    | 0.0             |                     |
| Q1, Q3                                            | -20.0, 20.0   | -10.0, 10.0    |                    | -20.0, 10.0     |                     |
| Range                                             | (-40.0-90.0)  | (-60.0-60.0)   |                    | (-60.0-90.0)    |                     |
| <b>Difference (95% CI)</b>                        |               |                | 2.1 (-12.9, 17.1)  |                 |                     |
| <b>LASA: Overall QOL: 12-Months</b>               |               |                |                    |                 | 0.9631 <sup>1</sup> |
| N                                                 | 25            | 23             |                    | 48              |                     |
| Mean (SD)                                         | -1.2 (23.5)   | -0.9 (25.6)    |                    | -1.0 (24.3)     |                     |
| Median                                            | 0.0           | 0.0            |                    | 0.0             |                     |
| Q1, Q3                                            | -10.0, 10.0   | -10.0, 10.0    |                    | -10.0, 10.0     |                     |
| Range                                             | (-50.0-60.0)  | (-70.0-50.0)   |                    | (-70.0-60.0)    |                     |
| <b>Difference (95% CI)</b>                        |               |                | -0.3 (-14.2, 13.6) |                 |                     |
| (report generated on 07MAR2017)                   |               |                |                    |                 |                     |
| <sup>1</sup> Unequal Variance T-Test              |               |                |                    |                 |                     |

| <b>LASA: Overall QOL<br/>Categorical Change from Baseline</b>              |               |                |                    |                 |                     |
|----------------------------------------------------------------------------|---------------|----------------|--------------------|-----------------|---------------------|
|                                                                            | SRS<br>(N=27) | WBRT<br>(N=27) |                    | Total<br>(N=54) | p value             |
| <b>LASA: Overall QOL: 3-Months</b>                                         |               |                |                    |                 | 0.0457 <sup>1</sup> |
| Missing                                                                    | 0             | 2              |                    | 2               |                     |
| At least 10% drop                                                          | 8 (29.6%)     | 13 (52.0%)     |                    | 21 (40.4%)      |                     |
| Stable                                                                     | 6 (22.2%)     | 8 (32.0%)      |                    | 14 (26.9%)      |                     |
| At least 10% improvement                                                   | 13 (48.1%)    | 4 (16.0%)      |                    | 17 (32.7%)      |                     |
| <b>Difference (95% CI)*</b>                                                |               |                | 32.1 (15.6, 48.7)  |                 |                     |
| <b>LASA: Overall QOL: 6-Months</b>                                         |               |                |                    |                 | 0.2165 <sup>1</sup> |
| Missing                                                                    | 1             | 1              |                    | 2               |                     |
| At least 10% drop                                                          | 6 (23.1%)     | 12 (46.2%)     |                    | 18 (34.6%)      |                     |
| Stable                                                                     | 7 (26.9%)     | 5 (19.2%)      |                    | 12 (23.1%)      |                     |
| At least 10% improvement                                                   | 13 (50.0%)    | 9 (34.6%)      |                    | 22 (42.3%)      |                     |
| <b>Difference (95% CI)*</b>                                                |               |                | 15.4 (-3, 33.8)    |                 |                     |
| <b>LASA: Overall QOL: 9-Months</b>                                         |               |                |                    |                 | 0.9976 <sup>1</sup> |
| Missing                                                                    | 4             | 1              |                    | 5               |                     |
| At least 10% drop                                                          | 9 (39.1%)     | 10 (38.5%)     |                    | 19 (38.8%)      |                     |
| Stable                                                                     | 6 (26.1%)     | 7 (26.9%)      |                    | 13 (26.5%)      |                     |
| At least 10% improvement                                                   | 8 (34.8%)     | 9 (34.6%)      |                    | 17 (34.7%)      |                     |
| <b>Difference (95% CI)*</b>                                                |               |                | 0.2 (-17.8, 18.1)  |                 |                     |
| <b>LASA: Overall QOL: 12-Months</b>                                        |               |                |                    |                 | 0.8725 <sup>1</sup> |
| Missing                                                                    | 2             | 4              |                    | 6               |                     |
| At least 10% drop                                                          | 10 (40.0%)    | 8 (34.8%)      |                    | 18 (37.5%)      |                     |
| Stable                                                                     | 8 (32.0%)     | 7 (30.4%)      |                    | 15 (31.3%)      |                     |
| At least 10% improvement                                                   | 7 (28.0%)     | 8 (34.8%)      |                    | 15 (31.3%)      |                     |
| <b>Difference (95% CI)*</b>                                                |               |                | -6.8 (-24.2, 10.7) |                 |                     |
| (report generated on 07MAR2017)                                            |               |                |                    |                 |                     |
| <sup>1</sup> Chi-Square                                                    |               |                |                    |                 |                     |
| * difference in proportion in the last category (At least 10% improvement) |               |                |                    |                 |                     |

**LASA: Overall Mental Well-Being  
Change from Baseline**

|                                                   | SRS<br>(N=27) | WBRT<br>(N=27) |                   | Total<br>(N=54) | p value             |
|---------------------------------------------------|---------------|----------------|-------------------|-----------------|---------------------|
| <b>LASA: Overall Mental Well-Being: 3-Months</b>  |               |                |                   |                 | 0.2094 <sup>1</sup> |
| N                                                 | 27            | 24             |                   | 51              |                     |
| Mean (SD)                                         | 2.2 (15.8)    | -5.0 (23.4)    |                   | -1.2 (19.9)     |                     |
| Median                                            | 0.0           | 0.0            |                   | 0.0             |                     |
| Q1, Q3                                            | -10.0, 10.0   | -20.0, 10.0    |                   | -10.0, 10.0     |                     |
| Range                                             | (-30.0-40.0)  | (-70.0-40.0)   |                   | (-70.0-40.0)    |                     |
| <b>Difference (95% CI)</b>                        |               |                | 7.2 (-3.9, 18.3)  |                 |                     |
| <b>LASA: Overall Mental Well-Being: 6-Months</b>  |               |                |                   |                 | 0.3447 <sup>1</sup> |
| N                                                 | 26            | 25             |                   | 51              |                     |
| Mean (SD)                                         | 4.2 (14.5)    | -0.8 (22.2)    |                   | 1.8 (18.6)      |                     |
| Median                                            | 0.0           | 0.0            |                   | 0.0             |                     |
| Q1, Q3                                            | 0.0, 10.0     | -10.0, 10.0    |                   | -10.0, 10.0     |                     |
| Range                                             | (-30.0-40.0)  | (-40.0-60.0)   |                   | (-40.0-60.0)    |                     |
| <b>Difference (95% CI)</b>                        |               |                | 5 (-5.3, 15.3)    |                 |                     |
| <b>LASA: Overall Mental Well-Being: 9-Months</b>  |               |                |                   |                 | 0.3349 <sup>1</sup> |
| N                                                 | 23            | 25             |                   | 48              |                     |
| Mean (SD)                                         | -5.7 (22.9)   | 0.8 (22.9)     |                   | -2.3 (22.9)     |                     |
| Median                                            | 0.0           | 0.0            |                   | 0.0             |                     |
| Q1, Q3                                            | -10.0, 0.0    | -10.0, 10.0    |                   | -10.0, 5.0      |                     |
| Range                                             | (-60.0-30.0)  | (-40.0-60.0)   |                   | (-60.0-60.0)    |                     |
| <b>Difference (95% CI)</b>                        |               |                | -6.5 (-19.5, 6.5) |                 |                     |
| <b>LASA: Overall Mental Well-Being: 12-Months</b> |               |                |                   |                 | 0.9484 <sup>1</sup> |
| N                                                 | 25            | 23             |                   | 48              |                     |
| Mean (SD)                                         | -6.0 (23.5)   | -6.5 (31.1)    |                   | -6.3 (27.1)     |                     |
| Median                                            | 0.0           | 0.0            |                   | 0.0             |                     |
| Q1, Q3                                            | -10.0, 10.0   | -20.0, 10.0    |                   | -15.0, 10.0     |                     |
| Range                                             | (-70.0-40.0)  | (-90.0-50.0)   |                   | (-90.0-50.0)    |                     |
| <b>Difference (95% CI)</b>                        |               |                | 0.5 (-15.2, 16.2) |                 |                     |

(report generated on 07MAR2017)

<sup>1</sup>Unequal Variance T-Test

| <b>LASA: Overall Mental Well-Being<br/>Categorical Change from Baseline</b> |               |                |                   |                 |         |
|-----------------------------------------------------------------------------|---------------|----------------|-------------------|-----------------|---------|
|                                                                             | SRS<br>(N=27) | WBRT<br>(N=27) |                   | Total<br>(N=54) | p value |
| <b>LASA: Overall Mental Well-Being: 3-Months</b>                            |               |                |                   |                 |         |
| Missing                                                                     | 0             | 2              |                   | 2               |         |
| At least 10% drop                                                           | 7 (25.9%)     | 11 (44.0%)     |                   | 18 (34.6%)      |         |
| Stable                                                                      | 11 (40.7%)    | 7 (28.0%)      |                   | 18 (34.6%)      |         |
| At least 10% improvement                                                    | 9 (33.3%)     | 7 (28.0%)      |                   | 16 (30.8%)      |         |
| <b>Difference (95% CI)*</b>                                                 |               |                | 5.3 (-12, 22.7)   |                 |         |
| <b>LASA: Overall Mental Well-Being: 6-Months</b>                            |               |                |                   |                 |         |
| Missing                                                                     | 1             | 1              |                   | 2               |         |
| At least 10% drop                                                           | 5 (19.2%)     | 11 (42.3%)     |                   | 16 (30.8%)      |         |
| Stable                                                                      | 10 (38.5%)    | 8 (30.8%)      |                   | 18 (34.6%)      |         |
| At least 10% improvement                                                    | 11 (42.3%)    | 7 (26.9%)      |                   | 18 (34.6%)      |         |
| <b>Difference (95% CI)*</b>                                                 |               |                | 15.4 (-2.3, 33.1) |                 |         |
| <b>LASA: Overall Mental Well-Being: 9-Months</b>                            |               |                |                   |                 |         |
| Missing                                                                     | 4             | 1              |                   | 5               |         |
| At least 10% drop                                                           | 7 (30.4%)     | 13 (50.0%)     |                   | 20 (40.8%)      |         |
| Stable                                                                      | 11 (47.8%)    | 6 (23.1%)      |                   | 17 (34.7%)      |         |
| At least 10% improvement                                                    | 5 (21.7%)     | 7 (26.9%)      |                   | 12 (24.5%)      |         |
| <b>Difference (95% CI)*</b>                                                 |               |                | -5.2 (-21.3, 11)  |                 |         |
| <b>LASA: Overall Mental Well-Being: 12-Months</b>                           |               |                |                   |                 |         |
| Missing                                                                     | 2             | 4              |                   | 6               |         |
| At least 10% drop                                                           | 11 (44.0%)    | 11 (47.8%)     |                   | 22 (45.8%)      |         |
| Stable                                                                      | 7 (28.0%)     | 6 (26.1%)      |                   | 13 (27.1%)      |         |
| At least 10% improvement                                                    | 7 (28.0%)     | 6 (26.1%)      |                   | 13 (27.1%)      |         |
| <b>Difference (95% CI)*</b>                                                 |               |                | 1.9 (-14.8, 18.7) |                 |         |
| (report generated on 07MAR2017)                                             |               |                |                   |                 |         |
| <sup>1</sup> Chi-Square                                                     |               |                |                   |                 |         |
| * difference in proportion in the last category (At least 10% improvement)  |               |                |                   |                 |         |

**LASA: Overall Physical Well-Being  
Change from Baseline**

|                                                     | SRS<br>(N=27) | WBRT<br>(N=27) |                    | Total<br>(N=54) | p value             |
|-----------------------------------------------------|---------------|----------------|--------------------|-----------------|---------------------|
| <b>LASA: Overall Physical Well-Being: 3-Months</b>  |               |                |                    |                 |                     |
| N                                                   | 27            | 24             |                    | 51              |                     |
| Mean (SD)                                           | 3.3 (25.9)    | -7.5 (18.0)    |                    | -1.8 (23.0)     |                     |
| Median                                              | 0.0           | -10.0          |                    | 0.0             |                     |
| Q1, Q3                                              | -10.0, 10.0   | -15.0, 0.0     |                    | -10.0, 10.0     |                     |
| Range                                               | (-40.0-80.0)  | (-50.0-30.0)   |                    | (-50.0-80.0)    |                     |
| <b>Difference (95% CI)</b>                          |               |                | 10.8 (-1.3, 22.9)  |                 |                     |
| <b>LASA: Overall Physical Well-Being: 6-Months</b>  |               |                |                    |                 |                     |
| N                                                   | 26            | 25             |                    | 51              | 0.7201 <sup>1</sup> |
| Mean (SD)                                           | 3.1 (24.9)    | 0.8 (20.0)     |                    | 2.0 (22.5)      |                     |
| Median                                              | 0.0           | 0.0            |                    | 0.0             |                     |
| Q1, Q3                                              | -10.0, 10.0   | -10.0, 10.0    |                    | -10.0, 10.0     |                     |
| Range                                               | (-40.0-70.0)  | (-50.0-40.0)   |                    | (-50.0-70.0)    |                     |
| <b>Difference (95% CI)</b>                          |               |                | 2.3 (-10.1, 14.7)  |                 |                     |
| <b>LASA: Overall Physical Well-Being: 9-Months</b>  |               |                |                    |                 |                     |
| N                                                   | 23            | 25             |                    | 48              | 0.6993 <sup>1</sup> |
| Mean (SD)                                           | -3.0 (23.0)   | -0.4 (24.1)    |                    | -1.7 (23.4)     |                     |
| Median                                              | 0.0           | 0.0            |                    | 0.0             |                     |
| Q1, Q3                                              | -20.0, 10.0   | -10.0, 10.0    |                    | -10.0, 10.0     |                     |
| Range                                               | (-50.0-60.0)  | (-50.0-50.0)   |                    | (-50.0-60.0)    |                     |
| <b>Difference (95% CI)</b>                          |               |                | -2.6 (-15.9, 10.7) |                 |                     |
| <b>LASA: Overall Physical Well-Being: 12-Months</b> |               |                |                    |                 |                     |
| N                                                   | 25            | 23             |                    | 48              | 0.1128 <sup>1</sup> |
| Mean (SD)                                           | -6.8 (23.6)   | 3.0 (18.4)     |                    | -2.1 (21.6)     |                     |
| Median                                              | 0.0           | 0.0            |                    | 0.0             |                     |
| Q1, Q3                                              | -20.0, 0.0    | -10.0, 10.0    |                    | -10.0, 10.0     |                     |
| Range                                               | (-50.0-60.0)  | (-30.0-40.0)   |                    | (-50.0-60.0)    |                     |
| <b>Difference (95% CI)</b>                          |               |                | -9.8 (-21.7, 2.1)  |                 |                     |

(report generated on 07MAR2017)

<sup>1</sup>Unequal Variance T-Test

| <b>LASA: Overall Physical Well-Being<br/>Categorical Change from Baseline</b> |               |                |                    |                 |                     |
|-------------------------------------------------------------------------------|---------------|----------------|--------------------|-----------------|---------------------|
|                                                                               | SRS<br>(N=27) | WBRT<br>(N=27) |                    | Total<br>(N=54) | p value             |
| <b>LASA: Overall Physical Well-Being: 3-Months</b>                            |               |                |                    |                 |                     |
| Missing                                                                       | 0             | 2              |                    | 2               | 0.0377 <sup>1</sup> |
| At least 10% drop                                                             | 8 (29.6%)     | 16 (64.0%)     |                    | 24 (46.2%)      |                     |
| Stable                                                                        | 6 (22.2%)     | 4 (16.0%)      |                    | 10 (19.2%)      |                     |
| At least 10% improvement                                                      | 13 (48.1%)    | 5 (20.0%)      |                    | 18 (34.6%)      |                     |
| <b>Difference (95% CI)*</b>                                                   |               |                | 28.1 (11.1, 45.2)  |                 |                     |
| <b>LASA: Overall Physical Well-Being: 6-Months</b>                            |               |                |                    |                 |                     |
| Missing                                                                       | 1             | 1              |                    | 2               | 0.9482 <sup>1</sup> |
| At least 10% drop                                                             | 8 (30.8%)     | 9 (34.6%)      |                    | 17 (32.7%)      |                     |
| Stable                                                                        | 7 (26.9%)     | 7 (26.9%)      |                    | 14 (26.9%)      |                     |
| At least 10% improvement                                                      | 11 (42.3%)    | 10 (38.5%)     |                    | 21 (40.4%)      |                     |
| <b>Difference (95% CI)*</b>                                                   |               |                | 3.8 (-14.6, 22.3)  |                 |                     |
| <b>LASA: Overall Physical Well-Being: 9-Months</b>                            |               |                |                    |                 |                     |
| Missing                                                                       | 4             | 1              |                    | 5               | 0.4660 <sup>1</sup> |
| At least 10% drop                                                             | 9 (39.1%)     | 13 (50.0%)     |                    | 22 (44.9%)      |                     |
| Stable                                                                        | 8 (34.8%)     | 5 (19.2%)      |                    | 13 (26.5%)      |                     |
| At least 10% improvement                                                      | 6 (26.1%)     | 8 (30.8%)      |                    | 14 (28.6%)      |                     |
| <b>Difference (95% CI)*</b>                                                   |               |                | -4.7 (-21.7, 12.3) |                 |                     |
| <b>LASA: Overall Physical Well-Being: 12-Months</b>                           |               |                |                    |                 |                     |
| Missing                                                                       | 2             | 4              |                    | 6               | 0.6053 <sup>1</sup> |
| At least 10% drop                                                             | 12 (48.0%)    | 8 (34.8%)      |                    | 20 (41.7%)      |                     |
| Stable                                                                        | 7 (28.0%)     | 7 (30.4%)      |                    | 14 (29.2%)      |                     |
| At least 10% improvement                                                      | 6 (24.0%)     | 8 (34.8%)      |                    | 14 (29.2%)      |                     |
| <b>Difference (95% CI)*</b>                                                   |               |                | -10.8 (-27.8, 6.3) |                 |                     |
| (report generated on 07MAR2017)                                               |               |                |                    |                 |                     |
| <sup>1</sup> Chi-Square                                                       |               |                |                    |                 |                     |
| * difference in proportion in the last category (At least 10% improvement)    |               |                |                    |                 |                     |

**LASA: Overall Emotional Well-Being  
Change from Baseline**

|                                                      | SRS<br>(N=27) | WBRT<br>(N=27) |                    | Total<br>(N=54) | p value             |
|------------------------------------------------------|---------------|----------------|--------------------|-----------------|---------------------|
| <b>LASA: Overall Emotional Well-Being: 3-Months</b>  |               |                |                    |                 |                     |
| N                                                    | 27            | 24             |                    | 51              |                     |
| Mean (SD)                                            | 9.3 (28.7)    | -12.5 (29.4)   |                    | -1.0 (30.7)     |                     |
| Median                                               | 10.0          | -10.0          |                    | 0.0             |                     |
| Q1, Q3                                               | -10.0, 20.0   | -30.0, 10.0    |                    | -20.0, 10.0     |                     |
| Range                                                | (-50.0-100.0) | (-80.0-40.0)   |                    | (-80.0-100.0)   |                     |
| <b>Difference (95% CI)</b>                           |               |                | 21.8 (5.8, 37.8)   |                 |                     |
| <b>LASA: Overall Emotional Well-Being: 6-Months</b>  |               |                |                    |                 |                     |
| N                                                    | 26            | 25             |                    | 51              | 0.9566 <sup>1</sup> |
| Mean (SD)                                            | -1.9 (28.1)   | -2.4 (33.7)    |                    | -2.2 (30.7)     |                     |
| Median                                               | -5.0          | -10.0          |                    | -10.0           |                     |
| Q1, Q3                                               | -20.0, 10.0   | -30.0, 20.0    |                    | -20.0, 10.0     |                     |
| Range                                                | (-40.0-90.0)  | (-60.0-70.0)   |                    | (-60.0-90.0)    |                     |
| <b>Difference (95% CI)</b>                           |               |                | 0.5 (-16.6, 17.6)  |                 |                     |
| <b>LASA: Overall Emotional Well-Being: 9-Months</b>  |               |                |                    |                 |                     |
| N                                                    | 23            | 25             |                    | 48              | 0.1737 <sup>1</sup> |
| Mean (SD)                                            | -1.7 (32.8)   | 10.0 (25.0)    |                    | 4.4 (29.3)      |                     |
| Median                                               | -10.0         | 10.0           |                    | 5.0             |                     |
| Q1, Q3                                               | -20.0, 10.0   | -10.0, 20.0    |                    | -15.0, 20.0     |                     |
| Range                                                | (-70.0-90.0)  | (-30.0-70.0)   |                    | (-70.0-90.0)    |                     |
| <b>Difference (95% CI)</b>                           |               |                | -11.7 (-28.3, 4.9) |                 |                     |
| <b>LASA: Overall Emotional Well-Being: 12-Months</b> |               |                |                    |                 |                     |
| N                                                    | 25            | 23             |                    | 48              | 0.0790 <sup>1</sup> |
| Mean (SD)                                            | -9.6 (26.4)   | 6.1 (33.3)     |                    | -2.1 (30.6)     |                     |
| Median                                               | -10.0         | 10.0           |                    | 0.0             |                     |
| Q1, Q3                                               | -20.0, 10.0   | -30.0, 30.0    |                    | -25.0, 10.0     |                     |
| Range                                                | (-60.0-40.0)  | (-40.0-70.0)   |                    | (-60.0-70.0)    |                     |
| <b>Difference (95% CI)</b>                           |               |                | -15.7 (-32.8, 1.4) |                 |                     |

(report generated on 07MAR2017)

<sup>1</sup>Unequal Variance T-Test

| <b>LASA: Overall Emotional Well-Being<br/>Categorical Change from Baseline</b> |               |                |                     |                 |         |
|--------------------------------------------------------------------------------|---------------|----------------|---------------------|-----------------|---------|
|                                                                                | SRS<br>(N=27) | WBRT<br>(N=27) |                     | Total<br>(N=54) | p value |
| <b>LASA: Overall Emotional Well-Being: 3-Months</b>                            |               |                |                     |                 |         |
| Missing                                                                        | 0             | 2              |                     | 2               |         |
| At least 10% drop                                                              | 8 (29.6%)     | 14 (56.0%)     |                     | 22 (42.3%)      |         |
| Stable                                                                         | 5 (18.5%)     | 4 (16.0%)      |                     | 9 (17.3%)       |         |
| At least 10% improvement                                                       | 14 (51.9%)    | 7 (28.0%)      |                     | 21 (40.4%)      |         |
| <b>Difference (95% CI)*</b>                                                    |               |                | 23.9 (5.9, 41.8)    |                 |         |
| <b>LASA: Overall Emotional Well-Being: 6-Months</b>                            |               |                |                     |                 |         |
| Missing                                                                        | 1             | 1              |                     | 2               |         |
| At least 10% drop                                                              | 13 (50.0%)    | 14 (53.8%)     |                     | 27 (51.9%)      |         |
| Stable                                                                         | 3 (11.5%)     | 3 (11.5%)      |                     | 6 (11.5%)       |         |
| At least 10% improvement                                                       | 10 (38.5%)    | 9 (34.6%)      |                     | 19 (36.5%)      |         |
| <b>Difference (95% CI)*</b>                                                    |               |                | 3.8 (-14.3, 22)     |                 |         |
| <b>LASA: Overall Emotional Well-Being: 9-Months</b>                            |               |                |                     |                 |         |
| Missing                                                                        | 4             | 1              |                     | 5               |         |
| At least 10% drop                                                              | 14 (60.9%)    | 9 (34.6%)      |                     | 23 (46.9%)      |         |
| Stable                                                                         | 0 (0.0%)      | 2 (7.7%)       |                     | 2 (4.1%)        |         |
| At least 10% improvement                                                       | 9 (39.1%)     | 15 (57.7%)     |                     | 24 (49.0%)      |         |
| <b>Difference (95% CI)*</b>                                                    |               |                | -18.6 (-37.1, 0)    |                 |         |
| <b>LASA: Overall Emotional Well-Being: 12-Months</b>                           |               |                |                     |                 |         |
| Missing                                                                        | 2             | 4              |                     | 6               |         |
| At least 10% drop                                                              | 13 (52.0%)    | 8 (34.8%)      |                     | 21 (43.8%)      |         |
| Stable                                                                         | 5 (20.0%)     | 3 (13.0%)      |                     | 8 (16.7%)       |         |
| At least 10% improvement                                                       | 7 (28.0%)     | 12 (52.2%)     |                     | 19 (39.6%)      |         |
| <b>Difference (95% CI)*</b>                                                    |               |                | -24.2 (-42.1, -6.3) |                 |         |
| (report generated on 07MAR2017)                                                |               |                |                     |                 |         |
| <sup>1</sup> Chi-Square                                                        |               |                |                     |                 |         |
| * difference in proportion in the last category (At least 10% improvement)     |               |                |                     |                 |         |



|                                         | SRS<br>(N=27) | WBRT<br>(N=27) | Total<br>(N=54) | p value             |
|-----------------------------------------|---------------|----------------|-----------------|---------------------|
| <b>Subsequent Treatment Reported</b>    |               |                |                 | 0.5796 <sup>1</sup> |
| No                                      | 12 (44.4%)    | 10 (37.0%)     | 22 (40.7%)      |                     |
| Yes                                     | 15 (55.6%)    | 17 (63.0%)     | 32 (59.3%)      |                     |
|                                         |               |                |                 |                     |
| <b>Subsequent Treatment</b>             |               |                |                 | 0.1128 <sup>1</sup> |
| Missing                                 | 12            | 10             | 22              |                     |
| Chemo                                   | 8 (53.3%)     | 9 (52.9%)      | 17 (53.1%)      |                     |
| Chemo, SRS                              | 0 (0.0%)      | 1 (5.9%)       | 1 (3.1%)        |                     |
| Chemo, SRS, WBRT,<br>Surgical Resection | 1 (6.7%)      | 0 (0.0%)       | 1 (3.1%)        |                     |
| Other                                   | 2 (13.3%)     | 0 (0.0%)       | 2 (6.3%)        |                     |
| SRS                                     | 1 (6.7%)      | 5 (29.4%)      | 6 (18.8%)       |                     |
| SRS, Surgical Resection                 | 0 (0.0%)      | 1 (5.9%)       | 1 (3.1%)        |                     |
| Surgical Resection                      | 0 (0.0%)      | 1 (5.9%)       | 1 (3.1%)        |                     |
| WBRT                                    | 3 (20.0%)     | 0 (0.0%)       | 3 (9.4%)        |                     |

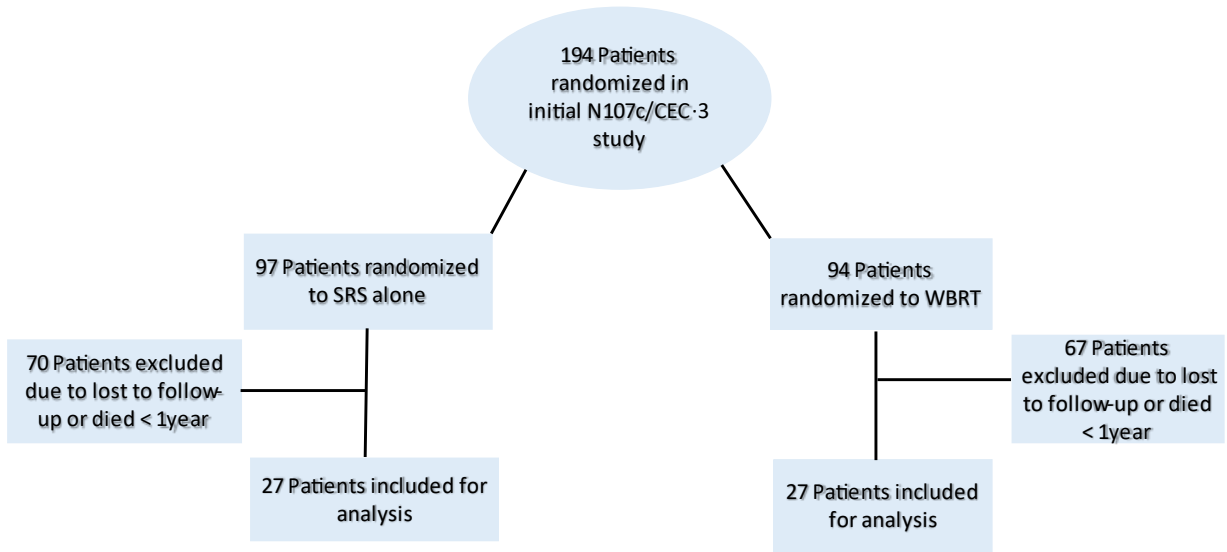

**Supplemental Figure 1. Consort Diagram**

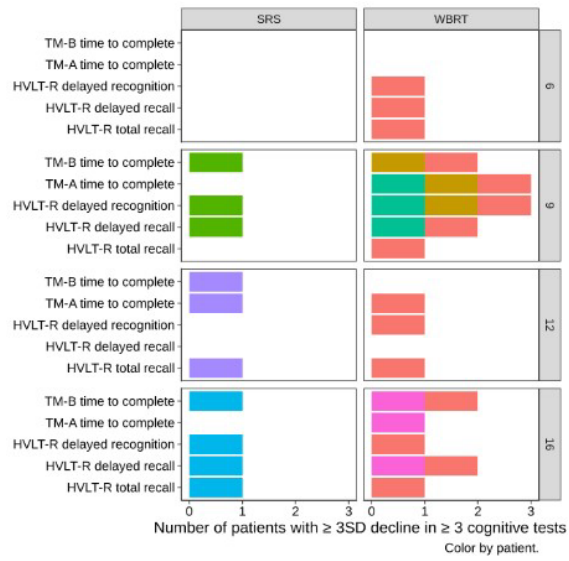

**Supplemental Figure 2: Number of patients with a 3 SD decline in 3 or more cognitive tests based on treatment arm .**

Abbreviations: HVL-R, Hopkins Verbal Learning Test -Revised; TM -A, Trail Making Test Part A; TM -B, Trail Making Test Part B; COW AT, Controlled Oral Word Association Test

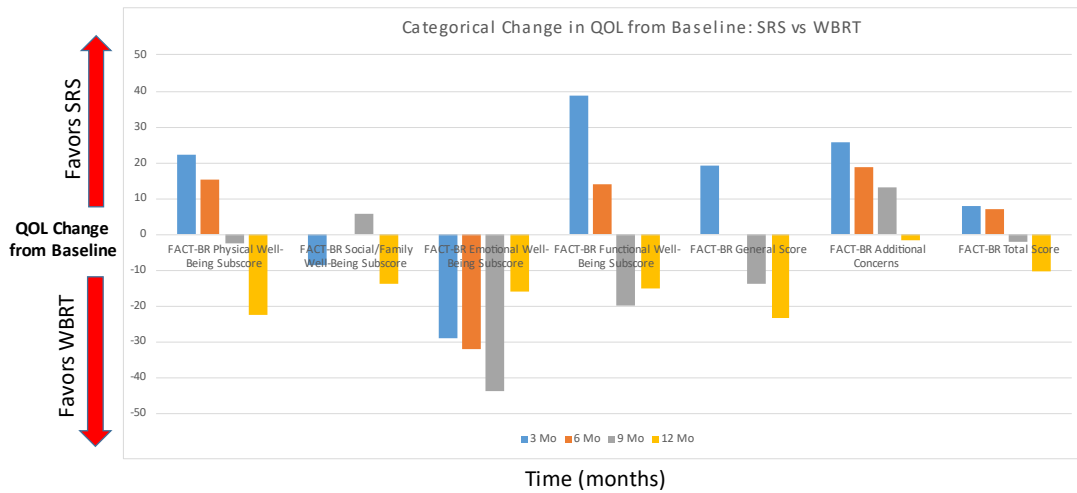

**Supplemental Figure 3A. Categorical Change in QOL from baseline comparing SRS vs WBRT.**

**(Numbers above 0 indicate % difference in favor of SRS alone)**

Abbreviations: FACT -Br, Functional Assessment of Cancer Therapy -Brain; Barthel ADL Index, Barthel Index of Activities of Daily Living; LASA, Linear Analog Self Assessments; QOL, quality of life.

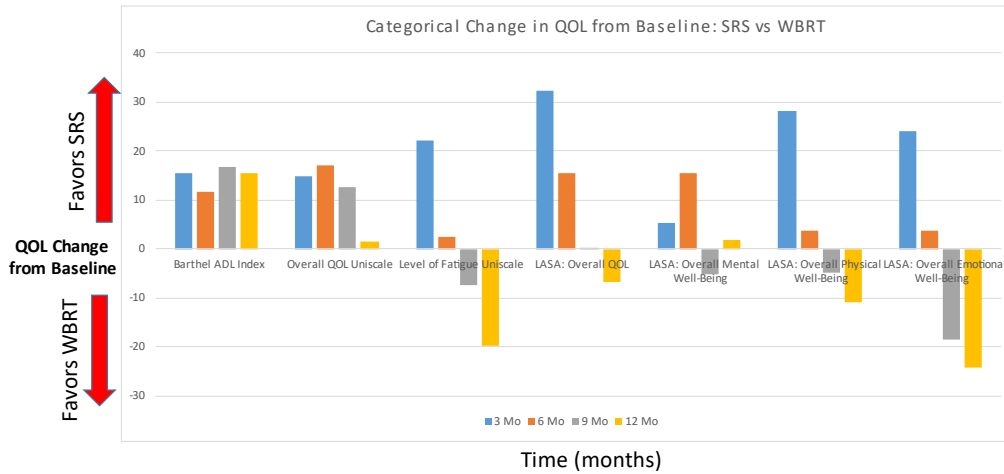

**Supplemental Figure 3B. Categorical Change from Baseline for QOL and Functional Independence Comparing**

**SRS vs WBRT. (Numbers above 0 indicate % difference in favor of SRS alone)**

Abbreviations: Barthel ADL Index, Barthel Index of Activities of Daily Living; LASA, Linear Analog Self Assessments; QOL, quality of life.
