# Supplementary material
Source: PubMed Central journal article supplement (PMC9585461)
Supplement: jamaoncol-e225049-s003.pdf [file jamaoncol-e225049-s003.pdf]

## Data Sharing Statement

Palmer. Association of Long-term Outcomes with Stereotactic Radiosurgery vs Whole-Brain Radiotherapy for Resected Brain Metastasis. *JAMA Oncol.* Published October 20, 2022.  
doi:10.1001/jamaoncol.2022.5049

### Data

**Data available:** No

### Additional Information

**Explanation for why data not available:** Data will be made available through the Alliance data requisition process
